# Supplementary material for: Anticancer activity of a novel methylated analogue of L-mimosine against an in vitro model of human malignant melanoma
Source: PubMed Central journal article supplement (PMC7211211; doi:10.1007/s10637-019-00809-0), 2019-06-26
Supplement: 10637_2019_809_MOESM1_ESM.pdf [file 10637_2019_809_MOESM1_ESM.pdf]

# **SUPPLEMENTARY MATERIAL**

**Anticancer activity of a novel methylated analogue of *L*-mimosine against an *in vitro* model of human malignant melanoma**

Sotiris Kyriakou<sup>1</sup>, Melina Mitsiogianni<sup>1</sup>, Theodora Mantso<sup>1</sup>, William Cheung<sup>1</sup>, Stephen Todryk<sup>1</sup>,  
Stephany Veuger<sup>1</sup>, Aglaia Pappa<sup>2</sup>, David Tetard<sup>\*1</sup> and Mihalis I. Panayiotidis<sup>\*1</sup>

<sup>1</sup>Department of Applied Sciences, Northumbria University, Ellison Building, NE1 8ST, Newcastle Upon Tyne, UK; <sup>2</sup>Department of Molecular Biology & Genetics, Democritus University of Thrace, Alexandroupolis, 68100, Greece

## TABLE OF CONTENTS

|                                                                                                                                                                                                                                                                                                                                                                                                                                                                                                |    |
|------------------------------------------------------------------------------------------------------------------------------------------------------------------------------------------------------------------------------------------------------------------------------------------------------------------------------------------------------------------------------------------------------------------------------------------------------------------------------------------------|----|
| ORGANIC SYNTHESIS .....                                                                                                                                                                                                                                                                                                                                                                                                                                                                        | 5  |
| Synthesis of <i>rac</i> -10 and <i>rac</i> -11 .....                                                                                                                                                                                                                                                                                                                                                                                                                                           | 5  |
| Synthesis of <i>rac</i> -18.....                                                                                                                                                                                                                                                                                                                                                                                                                                                               | 9  |
| Synthesis of <i>L</i> -22 and <i>D</i> -23 .....                                                                                                                                                                                                                                                                                                                                                                                                                                               | 14 |
| Synthesis of <i>rac</i> -29.....                                                                                                                                                                                                                                                                                                                                                                                                                                                               | 17 |
| PROOF OF PRODUCTS PURITY BY HPLC.....                                                                                                                                                                                                                                                                                                                                                                                                                                                          | 21 |
| Figure S1: Analytical HPLC chromatogram of compound 10 .....                                                                                                                                                                                                                                                                                                                                                                                                                                   | 21 |
| Figure S2: Analytical HPLC chromatogram of compound 11 .....                                                                                                                                                                                                                                                                                                                                                                                                                                   | 21 |
| Figure S3: Analytical HPLC chromatogram of compound 18 .....                                                                                                                                                                                                                                                                                                                                                                                                                                   | 22 |
| Figure S4: Analytical HPLC chromatogram of compound 22 .....                                                                                                                                                                                                                                                                                                                                                                                                                                   | 22 |
| Figure S5: Analytical HPLC chromatogram of compound 29 .....                                                                                                                                                                                                                                                                                                                                                                                                                                   | 23 |
| <sup>1</sup> H AND <sup>13</sup> C-NMR FOR ALL INTERMEDIATES AND FINAL PRODUCTS; HRMS FOR NOVEL COMPOUNDS AND FINAL PRODUCTS.....                                                                                                                                                                                                                                                                                                                                                              | 24 |
| Figure S6: (A) <sup>1</sup> H-NMR spectra of 5-(benzyloxy)2-(hydroxymethyl)-4H-pyran-4-one (7) at 400 MHz in DMSO-d <sub>6</sub> and (B) <sup>13</sup> C-NMR spectra of 5-(benzyloxy)2-(hydroxymethyl)-4H-pyran-4-one (7) at 100 MHz in DMSO-d <sub>6</sub> . .....                                                                                                                                                                                                                            | 25 |
| Figure S7: (A) <sup>1</sup> H-NMR spectra of [5-(benzyloxy)-4-oxo-4H-pyran-2-yl]methyl 4-methylbenzene-1-sulfonate (8) at 400 MHz in CDCl <sub>3</sub> , (B) <sup>13</sup> C-NMR spectra of [5-(benzyloxy)-4-oxo-4H-pyran-2-yl]methyl 4-methylbenzene-1-sulfonate (8) at 100 MHz in CDCl <sub>3</sub> and (C) HRMS of [5-(benzyloxy)-4-oxo-4H-pyran-2-yl]methyl 4-methylbenzene-1-sulfonate (8).....                                                                                           | 27 |
| Figure S8: (A) <sup>1</sup> H-NMR spectra of 1,3-diethyl 2-[[5-(benzyloxy)-4-oxo-4H-pyran-2-yl]methyl]-2-acetamidopropanedioate (9) at 400 MHz in DMSO-d <sub>6</sub> and (B) <sup>13</sup> C-NMR spectra of 1,3-diethyl 2-[[5-(benzyloxy)-4-oxo-4H-pyran-2-yl]methyl]-2-acetamidopropanedioate (9) at 100 MHz in DMSO-d <sub>6</sub> and (C) HRMS of 1,3-diethyl 2-[[5-(benzyloxy)-4-oxo-4H-pyran-2-yl]methyl]-2-acetamidopropanedioate (9) .....                                             | 29 |
| Figure S9: <sup>1</sup> H-NMR spectra <i>rac</i> -2-amino-3-(5-hydroxy-4-oxo-4H-pyran-2-yl)propanoic acid (10) at 400 MHz in D <sub>2</sub> O/CF <sub>3</sub> CO <sub>2</sub> D and (B) <sup>13</sup> C-NMR spectra of <i>rac</i> -2-amino-3-(5-hydroxy-4-oxo-4H-pyran-2-yl)propanoic acid (10) at 100 MHz in D <sub>2</sub> O/CF <sub>3</sub> CO <sub>2</sub> D and (C) HRMS of <i>rac</i> -2-amino-3-(5-hydroxy-4-oxo-4H-pyran-2-yl)propanoic acid (10).....                                 | 31 |
| Figure S10: <sup>1</sup> H-NMR spectra <i>rac</i> -2-amino-3-(5-hydroxy-4-oxo-1,4-dihydropyridin-2-yl)propanoic acid (11) at 400 MHz in D <sub>2</sub> O/CF <sub>3</sub> CO <sub>2</sub> D and (B) <sup>13</sup> C-NMR spectra of <i>rac</i> -2-amino-3-(5-hydroxy-4-oxo-1,4-dihydropyridin-2-yl)propanoic acid (11) at 100 MHz in D <sub>2</sub> O/CF <sub>3</sub> CO <sub>2</sub> D and (C) HRMS of <i>rac</i> -2-amino-3-(5-hydroxy-4-oxo-1,4-dihydropyridin-2-yl)propanoic acid (11) ..... | 33 |
| Figure S11: (A) <sup>1</sup> H-NMR spectra of 5-bromo-2-methoxypyridine (12) at 400 MHz in CDCl <sub>3</sub> , (B) <sup>13</sup> C-NMR spectra of 5-bromo-2-methoxypyridine (12) at 100 MHz in CDCl <sub>3</sub> . .....                                                                                                                                                                                                                                                                       | 34 |
| Figure S12: (A) <sup>1</sup> H-NMR spectra of 6-methoxypyridine-3-carbaldehyde (13) at 400 MHz in CDCl <sub>3</sub> , (B) <sup>13</sup> C-NMR spectra of 6-methoxypyridine-3-carbaldehyde (13) at 100 MHz in CDCl <sub>3</sub> . .....                                                                                                                                                                                                                                                         | 35 |
| Figure S13: <sup>1</sup> H-NMR spectra (4Z)-4-[(6-methoxypyridin-3-yl)methylidene]-2-methyl-4,5-dihydro-1,3-oxazol-5-one (14) at 400 MHz in CDCl <sub>3</sub> and (B) <sup>13</sup> C-NMR spectra of (4Z)-4-[(6-methoxypyridin-3-yl)methylidene]-2-methyl-4,5-dihydro-1,3-oxazol-5-one (14) at 100 MHz in CDCl <sub>3</sub> and (C) HRMS of (4Z)-4-[(6-methoxypyridin-3-yl)methylidene]-2-methyl-4,5-dihydro-1,3-oxazol-5-one (14). .....                                                      | 37 |
| Figure S14: <sup>1</sup> H-NMR spectra of (2Z)-2-acetamido-3-(6-methoxypyridin-3-yl)prop-2-enoic acid (15) at 400 MHz in CDCl <sub>3</sub> and (B) <sup>13</sup> C-NMR spectra of (2Z)-2-acetamido-3-(6-methoxypyridin-3-yl)prop-2-enoic acid (15) at 100 MHz in CDCl <sub>3</sub> and (C) HRMS of (2Z)-2-acetamido-3-(6-methoxypyridin-3-yl)prop-2-enoic acid (15) .....                                                                                                                      | 39 |
| Figure S15: <sup>1</sup> H-NMR spectra of <i>rac</i> -2-acetamido-3-(6-methoxypyridin-3-yl)propanoic acid (16) at 400 MHz in MeOH- <i>d</i> <sub>4</sub> and (B) <sup>13</sup> C-NMR spectra of <i>rac</i> -2-acetamido-3-(6-methoxypyridin-3-yl)propanoic acid (16) at 100 MHz in MeOH- <i>d</i> <sub>4</sub> and (C) HRMS of <i>rac</i> -2-acetamido-3-(6-methoxypyridin-3-yl)propanoic acid (16) .....                                                                                      | 41 |
| Figure S16: <sup>1</sup> H-NMR spectra of <i>rac</i> -5-(2-carboxy-2-acetamidoethyl)-2-methoxypyridin-1-ium-1-olate (17) .....                                                                                                                                                                                                                                                                                                                                                                 | 43 |

|                                                                                                                                                                                                                                                                                                                                                                                                                                                                                                         |    |
|---------------------------------------------------------------------------------------------------------------------------------------------------------------------------------------------------------------------------------------------------------------------------------------------------------------------------------------------------------------------------------------------------------------------------------------------------------------------------------------------------------|----|
| at 400 MHz in DMSO- <i>d</i> <sub>6</sub> and (B) <sup>13</sup> C-NMR spectra of <i>rac</i> -5-(2-carboxy-2-acetamidoethyl)-2-methoxypyridin-1-ium-1-olate (17) at 100 MHz in DMSO- <i>d</i> <sub>6</sub> and (C) HRMS of <i>rac</i> -5-(2-carboxy-2-acetamidoethyl)-2-methoxypyridin-1-ium-1-olate (17) .....                                                                                                                                                                                          | 43 |
| Figure S17: <sup>1</sup> H-NMR spectra of <i>rac</i> -2-amino-3-(1-hydroxy-6-oxo-1,6-dihydropyridin-3-yl)propanoic acid (18) .....                                                                                                                                                                                                                                                                                                                                                                      | 45 |
| Figure S18: (A) <sup>1</sup> H-NMR spectra of 3-(benzyloxy)-2-methyl-1,4-dihydropyridin-4-one (19) at 400 MHz in CDCl <sub>3</sub> , (B) <sup>13</sup> C-NMR spectra of 3-(benzyloxy)-2-methyl-1,4-dihydropyridin-4-one (19) at 100 MHz in CDCl <sub>3</sub> .....                                                                                                                                                                                                                                      | 46 |
| Figure S19: (A) <sup>1</sup> H-NMR spectra of (2L)-3-amino-2-[[tert-butoxy]carbonyl]amino}propanoic acid (20) at 400 MHz in DMSO- <i>d</i> <sub>6</sub> and (B) <sup>13</sup> C-NMR spectra of (2L)-3-amino-2-[[tert-butoxy]carbonyl]amino}propanoic acid (20) at 100 MHz in DMSO- <i>d</i> <sub>6</sub> .....                                                                                                                                                                                          | 47 |
| Figure S20: (A) <sup>1</sup> H-NMR spectra (2L)-2-amino-3-(3-hydroxy-2-methyl-4-oxo-1,4-dihydropyridin-1-yl)propanoic acid (22) at 400 MHz in D <sub>2</sub> O/CF <sub>3</sub> CO <sub>2</sub> D and (B) <sup>13</sup> C-NMR spectra of (2L)-2-amino-3-(3-hydroxy-2-methyl-4-oxo-1,4-dihydropyridin-1-yl)propanoic acid (22) at 100 MHz in D <sub>2</sub> O/CF <sub>3</sub> CO <sub>2</sub> D and (C) HRMS of (2L)-2-amino-3-(3-hydroxy-2-methyl-4-oxo-1,4-dihydropyridin-1-yl)propanoic acid (22)..... | 49 |
| Figure S21: (A) <sup>1</sup> H-NMR spectra of (2D)-3-amino-2-[[tert-butoxy]carbonyl]amino}propanoic acid (21) at 400 MHz in DMSO- <i>d</i> <sub>6</sub> and (B) <sup>13</sup> C-NMR spectra of (2D)-3-amino-2-[[tert-butoxy]carbonyl]amino}propanoic acid (21) at 100 MHz in DMSO- <i>d</i> <sub>6</sub> .....                                                                                                                                                                                          | 50 |
| Figure S22: (A) <sup>1</sup> H-NMR spectra (2D)-2-amino-3-(3-hydroxy-2-methyl-4-oxo-1,4-dihydropyridin-1-yl)propanoic acid (23) at 400 MHz in D <sub>2</sub> O/CF <sub>3</sub> CO <sub>2</sub> D and (B) <sup>13</sup> C-NMR spectra of (2D)-2-amino-3-(3-hydroxy-2-methyl-4-oxo-1,4-dihydropyridin-1-yl)propanoic acid (23) at 100 MHz in D <sub>2</sub> O/CF <sub>3</sub> CO <sub>2</sub> D and (C) HRMS of (2R)-2-amino-3-(3-hydroxy-2-methyl-4-oxo-1,4-dihydropyridin-1-yl)propanoic acid (23)..... | 52 |
| Figure S23: (A) <sup>1</sup> H-NMR spectra of 5-(benzyloxy)-2-(hydroxymethyl)-1,4-dihydropyridin-4-one (24) at 400 MHz in DMSO- <i>d</i> <sub>6</sub> and (B) <sup>13</sup> C-NMR spectra of 5-(benzyloxy)-2-(hydroxymethyl)-1,4-dihydropyridin-4-one (24) at 100 MHz in DMSO- <i>d</i> <sub>6</sub> .....                                                                                                                                                                                              | 53 |
| Figure S24: (A) <sup>1</sup> H-NMR spectra of 5-(benzyloxy)-4-chloro-2-(chloromethyl)pyridine (25) at 400 MHz in DMSO- <i>d</i> <sub>6</sub> and (B) <sup>13</sup> C-NMR spectra of 5-(benzyloxy)-4-chloro-2-(chloromethyl)pyridine (25) at 100 MHz in DMSO- <i>d</i> <sub>6</sub> .....                                                                                                                                                                                                                | 54 |
| Figure S25: (A) <sup>1</sup> H-NMR spectra of 1,3-diethyl 2-[[5-(benzyloxy)-4-chloropyridin-2-yl]methyl]-2-acetamidopropanedioate (26) at 400 MHz in DMSO- <i>d</i> <sub>6</sub> and (B) <sup>13</sup> C-NMR spectra of 1,3-diethyl 2-[[5-(benzyloxy)-4-chloropyridin-2-yl]methyl]-2-acetamidopropanedioate (26) at 100 MHz in DMSO- <i>d</i> <sub>6</sub> .....                                                                                                                                        | 55 |
| Figure S26: (A) <sup>1</sup> H-NMR spectra of 1,3-diethyl 2-acetamido-2-[[5-hydroxypyridin-2-yl]methyl]propanedioate (27) at 400 MHz in DMSO- <i>d</i> <sub>6</sub> and (B) <sup>13</sup> C-NMR spectra of 1,3-diethyl 2-acetamido-2-[[5-hydroxypyridin-2-yl]methyl]propanedioate (27) at 100 MHz in DMSO- <i>d</i> <sub>6</sub> .....                                                                                                                                                                  | 56 |
| Figure S27: (A) <sup>1</sup> H-NMR spectra of 1,3-diethyl 2-acetamido-2-[[5-hydroxy-6-iodopyridin-2-yl]methyl]propanedioate (28) at 400 MHz in DMSO- <i>d</i> <sub>6</sub> and (B) <sup>13</sup> C-NMR spectra of 1,3-diethyl 2-acetamido-2-[[5-hydroxy-6-iodopyridin-2-yl]methyl]propanedioate (28) at 100 MHz in DMSO- <i>d</i> <sub>6</sub> .....                                                                                                                                                    | 57 |
| Figure S28: (A) <sup>1</sup> H-NMR spectra of <i>rac</i> -2-amino-3-(5-hydroxy-6-oxo-1,6-dihydropyridin-2-yl)propanoic acid (29) at 400 MHz in D <sub>2</sub> O/CF <sub>3</sub> CO <sub>2</sub> D, (B) <sup>13</sup> C-NMR spectra of <i>rac</i> -2-amino-3-(5-hydroxy-6-oxo-1,6-dihydropyridin-2-yl)propanoic acid (29) at 100 MHz in D <sub>2</sub> O/CF <sub>3</sub> CO <sub>2</sub> D and (C) HRMS of <i>rac</i> -2-amino-3-(5-hydroxy-6-oxo-1,6-dihydropyridin-2-yl)propanoic acid (29).....       | 59 |
| <b>REFERENCES</b> .....                                                                                                                                                                                                                                                                                                                                                                                                                                                                                 | 60 |

## ORGANIC SYNTHESIS

### Synthesis of *rac*-10 and *rac*-11

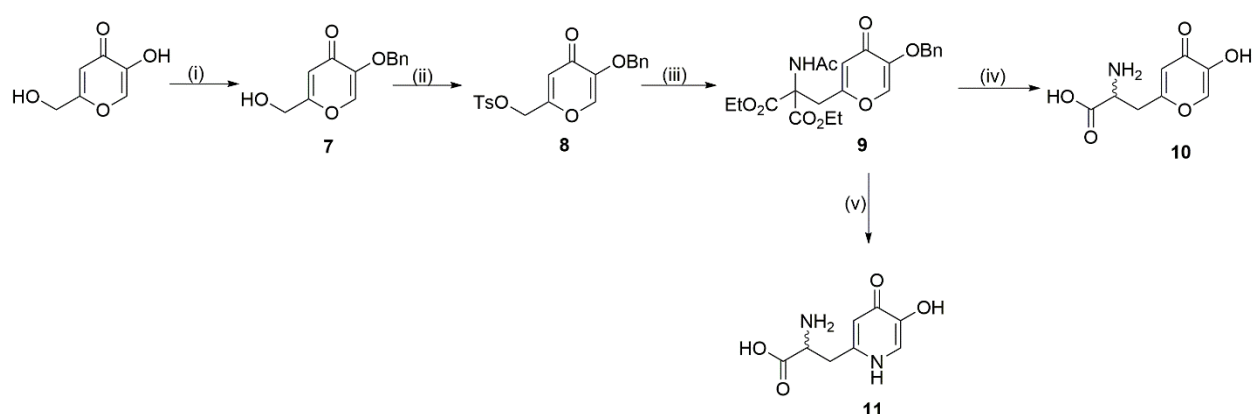

**Scheme 1:** Reagents and conditions for the synthesis of **compounds 10 and 11**. (i) **a**) NaOH<sub>(aq)</sub>, MeOH, 40 mins, 110°C, **b**) BnBr, overnight, 120°C, 87%; (ii) TsCl, NaOH<sub>(aq)</sub>, acetone, 20 mins, RT, 94%; (iii) Diethyl acetamidomalonate, NaH (60% in mineral oil) DMF<sub>(dry)</sub>, overnight, RT, 95%; (iv) **a**) conc. HCl, 180°C, 3 hrs, **b**) conc. NH<sub>4</sub>OH, pH 5, 5°C, 89%; (v) **a**) conc. NH<sub>4</sub>OH, 130°C, 3 hrs, **b**) conc. HCl, 180°C, 3 hrs, **c**) conc. NH<sub>4</sub>OH, pH 5, 5°C, 91%.

### 5-(benzyloxy)-2-(hydroxymethyl)-4H-pyran-4-one (compound 7) [1]

A sample of kojic acid (20 g, 141 mmol, 1eq) was dissolved in methanol (80 mL) and mixed with a solution of sodium hydroxide (6.2 g, 155 mmol, 1.1eq) in water (30 mL). The mixture was reflux for 40 min before the dropwise addition of benzyl bromide (19 mL, 155 mmol, 1.1eq). The mixture was allowed to reflux overnight. Upon completion of the reaction, the solvents were removed under reduced pressure and the residue was taken up in dichloromethane (200 mL) and washed with aqueous solution of sodium hydroxide (5%, 2 x 100 mL). The organic extracts were then washed with water, brine, dried over magnesium sulphate and concentrated under reduced pressure to give the crude product as yellowish crystals. The crude product was recrystallized from isopropanol, dried overnight at 65 °C affording the pure product (**compound 7**) as white crystals (29 g, 125 mmol, 87%). Mp: 126-129°C [lit: 128-130 °C] [1]. <sup>1</sup>H-NMR (400 MHz, DMSO-*d*<sub>6</sub>): δ<sub>H</sub>= 4.24 (d, J= 5.6 Hz, 2H, H-6), 4.89 (s, 2H, H-8), 5.70 (t, J= 5.6, 1H, H-7) 6.29 (s, 1H, H-4), 7.26-7.38 (m, 5H, H-10, H-11,

H-12), 8.13 (s, 1H, H-4) ppm;  $^{13}\text{C}$ -NMR (100 MHz, DMSO- $d_6$ ):  $\delta_{\text{C}} = 65.5$  (C-6), 71.0 (C-7), 111.6 (C-1), 128.6 (Ar), 128.7 (Ar), 128.9 (Ar), 136.6 (C-8), 141.6 (C-4), 147.1 (C-3), 168.7 (C-3), 173.8 (C-2) ppm.

**[5-(benzyloxy)-4-oxo-4*H*-pyran-2-yl]methyl 4-methylbenzene-1-sulfonate (compound 8)**  
[2]

A sample of 5-(benzyloxy)-2-(hydroxymethyl)-4*H*-pyran-4-one (**compound 7**) (25 g, 108 mmol, 1eq) was dissolved in acetone (350 mL) and stirred vigorously before tosyl chloride (21 g, 110 mmol, 1.1eq) was added at RT. Then, a solution of sodium hydroxide (4.3 g, 108 mmol, 1eq) in water (18 mL) was added and the resulting mixture stirred at RT for 20 min. The crude product was precipitated upon addition of water (150 mL) and was purified by recrystallization from methanol/water affording the pure compound (**compound 8**) as pale-yellow crystals (38 g, 98 mmol, 94%). Mp: 111-114°C [lit: 112°C] [2].  $^1\text{H}$ -NMR (400 MHz, DMSO- $d_6$ ):  $\delta_{\text{H}} = 2.47$  (s, 3H, H-16), 4.77(s, 2H, H-6), 5.02 (s, 2H, H-7), 6.33 (s, 1H, H-1), 7.32-7.36 (m, 7H, H-9, H-10, H-11, H-14), 7.46 (s, 1H, H-1), 7.77 (d,  $J = 8$  Hz, 2H, H-13) ppm;  $^{13}\text{C}$ -NMR (100 MHz, DMSO- $d_6$ ):  $\delta_{\text{C}} = 21.8$  (C-15), 66.0 (C-6), 71.9 (C-7), 115.5 (C-1), 127.8 (Ar), 128.1 (Ar), 128.6 (Ar), 128.9 (Ar), 130.2 (Ar), 132.3 (Ar), 135.5 (Ar), 141.5 (C-4), 145.8 (Ar), 147.4 (C-3), 158.7 (C-5), 174.0 (C-2) ppm. HRMS (ESI) for  $\text{C}_{20}\text{H}_{18}\text{O}_6\text{S}$ ; Theoretical  $[\text{M}+\text{H}]$ : 387.0824. Measured  $[\text{M}+\text{H}]$ : 387.0890.

**1,3-diethyl 2-[[5-(benzyloxy)-4-oxo-4*H*-pyran-2-yl]methyl]-2-acetamidopropane dioate (compound 9)**

In a solution of diethyl acetamidomalonate (10 g, 46 mmol, 2.1eq) in dry *N,N*-dimethyl formamide (70 mL), under nitrogen atmosphere, sodium hydride (60% in mineral oil, 2 g, 83 mmol, 3.7eq) was added in portions. Upon the evolution of hydrogen gas was ceasing, a sample of [5-(benzyloxy)-4-oxo-4*H*-pyran-2-yl]methyl 4-methylbenzene-1-sulfonate (**compound 8**)

(8.5 g, 22 mmol, 1eq) was added to the solution mixture which was stirred overnight at RT and protected from moisture. Upon completion of the reaction, the solvents were removed under reduced pressure forming a brown slurry which was mixed with water (100 mL) and stirred vigorously. The resulting crude product precipitated as brown solid, collected by filtration, left to dry overnight and purified by recrystallization (acetone/petroleum ether 60:80) affording the pure compound (**compound 9**) as light orange crystals (9.21 g, 21 mmol, 95%). Mp: 117-120°C [lit: 117-118°C] [1]. <sup>1</sup>H-NMR (400 MHz, DMSO-*d*<sub>6</sub>):  $\delta_H = 1.18$  (t, J= 7.2 Hz, 6H, H-10), 1.93 (s, 3H, H-13), 3.41 (s, 2H, H-6), 4.14 (m, 4H, H-9), 4.90 (s, 2H, H-14), 6.10 (s, 1H, H-1), 7.37-7.44 (m, 5H, H-16, H-17, H-18), 8.15 (s, 1H, H-4), 8.51 (s, 1H, H-11) ppm; <sup>13</sup>C-NMR (100 MHz, DMSO-*d*<sub>6</sub>):  $\delta_C = 14.3$  (C-10), 22.4 (C-13), 31.2 (C-6), 62.8 (C-9), 65.6 (C-7), 71.0 (C-14), 116.1 (C-4), 128.7 (Ar), 128.8 (Ar), 129.0 (Ar), 136.5 (Ar), 142.0 (C-1), 147.2 (C-3), 163.2 (C-5), 167.0 (C-12), 170.4 (C-8), 173.4 (C-2) ppm. HRMS (ESI) for C<sub>22</sub>H<sub>25</sub>NO<sub>8</sub>; Theoretical [M+H]: 432.1655. Measured [M+H]: 432.1656.

***rac*-2-amino-3-(5-hydroxy-4-oxo-4*H*-pyran-2-yl)propanoic acid (compound 10)**

A solution of concentrated hydrochloric acid (HCl) (40 mL) and 1, 3-diethyl 2-{[5-(benzyloxy)-4-oxo-4*H*-pyran-2-yl] methyl}-2-acetamidopropanedioate (**compound 9**) (5.1 g, 11.84 mmol) was heated at 180°C for 3 hrs. Upon completion of the reaction, the solvents were removed under reduced pressure forming a brown solid which was dissolved in water (20 mL). The solution was treated with charcoal, filtered and the pH of the filtrate was adjusted to 5.0 by the dropwise addition of concentrated ammonium hydroxide. The resulting solution was kept overnight at 5°C. White crystals were precipitated, collected, washed with water, acetone, petrol ether (60:80) and dried in the air affording the pure compound (**compound 10**) as white crystals (2.10 g, 10.54 mmol, 89%). Mp: 116-117°C. <sup>1</sup>H-NMR (400 MHz, D<sub>2</sub>O/CF<sub>3</sub>COOD 8:2):  $\delta_H = 2.63$ -2.75 (m, 2H, H-6), 3.84 (t, J= 6.8 Hz, 1H, H-7), 5.97 (s, 1H, H-1), 7.45 (1H, s, H-4) ppm; <sup>13</sup>C-NMR (100 MHz, D<sub>2</sub>O/CF<sub>3</sub>COOD 8:2):  $\delta_C = 32.9$  (C-6), 50.0 (C-7), 116.4 (C-

1), 119.3 (C-4), 142.5 (C-3), 144.2 (C-5), 169.4 (C-8), 175.5 (C-2) ppm. HRMS (ESI) for C<sub>8</sub>H<sub>9</sub>NO<sub>5</sub>; Theoretical [M+H]: 199.0713. Measured [M+H]:199.0710.

***rac*-2-amino-3-(5-hydroxy-4-oxo-1,4-dihydropyridin-2-yl)propanoic acid (compound 11)**

[1]

A portion of 1,3-diethyl 2-{{[5-(benzyloxy)-4-oxo-4*H*-pyran-2-yl]methyl}}-2 acetamidopropane dioate (**compound 9**) (4.2 g, 9.73 mmol) was mixed with a solution of concentrated ammonium hydroxide (25 mL) and the mixture was heated for 5 hrs in a stainless-steel bomb at 120°C. Upon completion of the reaction, the mixture was evaporated to dryness and the resulting solid was dissolved in a solution of concentrated HCl (30 mL). The resulting mixture was heated at 180°C for 3 hrs. The solvents were evaporated and the resulting crystals were dissolved in water (20 mL). The solution was treated with charcoal, filtered and the pH was adjusted to 5.0, using ammonia solution. The resulting solution was kept overnight at 5°C forming white crystals which were collected, washed with water, acetone, and light petroleum and dried affording the pure compound (**compound 11**) as white crystals (1.76 g, 8.9 mmol, 91%) Mp: 230-234°C [lit: >250°C] [1]. <sup>1</sup>H-NMR (400 MHz, D<sub>2</sub>O/CF<sub>3</sub>COOD 8:2): δ<sub>H</sub>= 2.69-2.83 (m, 2H, H-6), 3.73 (t, J= 6.8 Hz, 1H, H-7), 6.53 (s, 1H, H-1), 7.3 (s, 1H, H-4) ppm; <sup>13</sup>C-NMR (100 MHz, D<sub>2</sub>O/CF<sub>3</sub>COOD): δ<sub>C</sub>= 30.1 (C-6), 51.2 (C-7), 113.6 (C-1), 116.4 (C-4), 142.5 (C-3), 143.4 (C-5), 168.7 (C-8), 169.0 (C-2) ppm. HRMS (ESI) for C<sub>8</sub>H<sub>10</sub>N<sub>2</sub>O<sub>4</sub>; Theoretical [M+H]: 198.0640. Measured [M+H]: 198.0870.



## Synthesis of *rac*-18

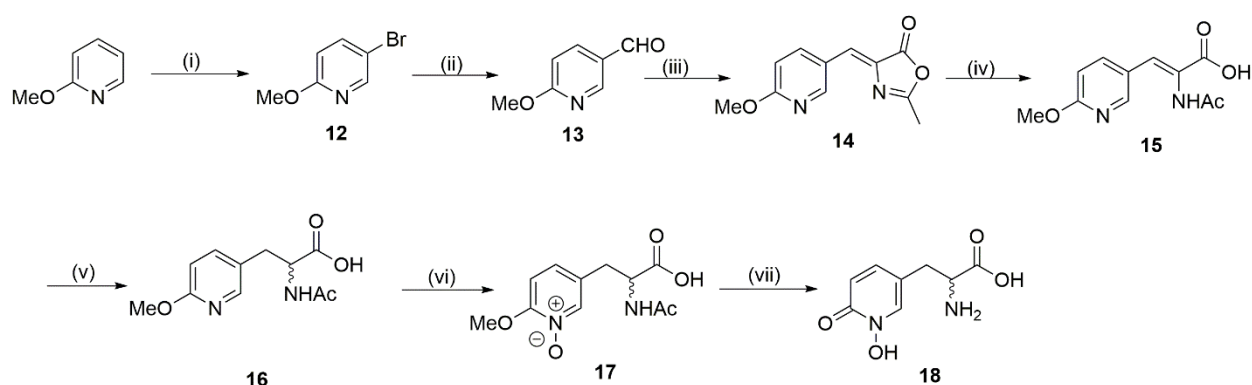

**Scheme 2:** Reagents and conditions for the synthesis of **compound 18**. (i) NBS, CH<sub>3</sub>CN, 90°C, 2 hrs, 18%; (ii) *n*-BuLi, Et<sub>2</sub>O, DMF, -35°C, 7 hrs, 67%; (iii) *N*-acetyl glycine, AcONa, Ac<sub>2</sub>O, 130°C, 4 hrs, 63%; (iv) H<sub>2</sub>O, reflux, 4 hrs, 81%; (v) H<sub>2</sub>, 10% Pd/C (*cat*), MeOH, RT, 9 hrs, 53%; (vi) *m*-CPBA, DCM, MeOH, RT, 48 hrs, 77%; (vii) conc. HCl, reflux, 1hr, 54%.

### 5-bromo-2-methoxypyridine (**compound 12**) [3]

In a suspension of 2-methoxypyridine (15 g, 138 mmol, 1eq) in acetonitrile (415 mL), *N*-bromosuccinimide (30 g, 169 mmol, 1.22eq) was added and the resulting mixture was refluxed for 20 hrs. Upon completion of the reaction, as it was indicated by TLC (SiO<sub>2</sub>, eluent: Petroleum Ether 60-80: Ethyl acetate, 8:2; UV-light), the mixture was filtered over a pad of silica. The solvents were evaporated, under reduced pressure, affording the crude product as orange oil which was then purified by an automated flash chromatography column (Isolera™ Biotech); R<sub>f</sub> = 0.83 (Petrol Ether 60-80: Ethyl acetate, 95:5; UV light) affording intermediate (**compound 12**) as a pale-yellow oil (4.7 g, 25 mmol, 18%). <sup>1</sup>H-NMR (400 MHz, CDCl<sub>3</sub>) δ<sub>H</sub> = 3.90 (s, 3H, H-7), 6.64 (d, J = 8.8 Hz, 1H, H-3), 7.61 (dd, J = 2.8 Hz, J = 8.8 Hz, 1H, H-4), 8.18 (d, J = 2.8 Hz, 1H, H-6) ppm; <sup>13</sup>C-NMR (100 MHz, CDCl<sub>3</sub>) δ<sub>C</sub> = 53.6 (C-7), 111.6 (C-5), 112.5 (C-3), 140.9 (C-4), 147.5 (C-6), 162.8 (C-2) ppm.

### 6-methoxypyridine-3-carbaldehyde (**compound 13**) [3]

In a solution of 5-bromo-2-methoxypyridine (**compound 12**) (4.7 g, 25 mmol, 1eq) in dry diethyl ether (50 mL) and under inert atmosphere, *n*-Butyl Lithium (2.5 M in hexanes, 12 mL, 30 mmol, 1.2eq) was added at -35°C, and stirred until the formation of a brown precipitate.

Then, dry *N, N*-dimethyl formamide (5.4 mL, 2.8 eq) was added dropwise for 5 min. The resulting mixture was stirred at 0°C (~2 hrs), protected from moisture and under inert atmosphere. Upon completion of the reaction, as it was indicated by TLC (SiO<sub>2</sub>, eluent Petroleum Ether 60:80: ethyl acetate, 80:20; UV light), the reaction was quenched by aqueous solution of ammonium chloride (5%, 25 mL). The aqueous layer was extracted with dichloromethane (3 x 50 mL). The combined organic extracts were dried over magnesium sulphate and concentrated under reduced pressure, forming the crude product as orange oil. The crude product was purified by automated flash chromatography column (Isolera™ Biotech); *R<sub>f</sub>* = 0.43 (Petrol Ether 60-80: diethyl ether, 60:40; UV light) affording intermediate (**compound 13**) as yellow crystals (2.53 g, 16.7 mmol, 67%). Mp: 42-44°C, [lit: 42-46°C] [3]. <sup>1</sup>H-NMR (400 MHz, CDCl<sub>3</sub>,) δ<sub>H</sub> = 4.03 (s, 3H, H-9), 6.84 (d, *J* = 8.4 Hz, 1H, H-3), 8.05 (dd, *J* = 2.4 Hz, *J* = 8.4 Hz, 1H, H-4), 8.63 (d, *J* = 2.4 Hz, 1H, H-1), 9.96 (s, 1H, H-8) ppm; <sup>13</sup>C-NMR (100 MHz, CDCl<sub>3</sub>) δ<sub>C</sub> = 54.4 (C-9), 112.2 (C-4), 126.7 (C-6), 137.5 (C-5) 153.5 (C-3), 167.8 (C-2), 189.6 (C-7) ppm.

**(4*Z*)-4-[(6-methoxypyridin-3-yl)methylidene]-2-methyl-4,5-dihydro-1,3-oxazol-5-one**  
**(compound 14)**

The synthesis was performed according to a modified method previously published [4]. Briefly, in a solution of 6-methoxypyridine-3-carbaldehyde (**compound 13**) (1.84 g, 12.17 mmol, 1eq) in acetic anhydride (8 mL), a sample of *N*-acetyl glycine (2.04 g, 17.44 mmol, 1.5eq.) and a sample of sodium acetate (1.5 g, 18.29 mmol, 1.5eq) were added sequentially. The resulting mixture was stirred at 125°C for 4 hrs. Upon completion of the reaction, the mixture was poured into ice-water and stirred for a further 1 hr leading to the formation of a yellow solid of the crude product which was collected by vacuum filtration, washed with water and dried in air. The crude product was purified by recrystallization from methanol affording the pure product (**compound 14**) as pale-yellow solid (1.66 g, 7.6 mmol, 63%). Mp: 152-154°C. <sup>1</sup>H-NMR (400

MHz, CDCl<sub>3</sub>,)  $\delta_H$ = 2.40 (s, 3H, H-11), 4.00 (s, 3H, H-12), 6.83 (d, J= 8.8 Hz, 1H, H-3), 7.12 (s, 1H, H-7), 8.6 (d, J= 2.4 Hz, H-6), 8.67 (dd, J= 2.4 Hz, J= 8.8 Hz, H-4) ppm; <sup>13</sup>C-NMR (100 MHz, CDCl<sub>3</sub>,)  $\delta_C$ = 15.8 (C-11), 54.1 (C-12), 111.8 (C-3), 123.3 (C-7), 128.1 (C-5), 132.0 (C-8), 140.9 (C-4), 152.1 (C-6), 165.4 (C-10), 165.7 (C-9), 167.7 (C-2) ppm. HRMS (ESI) for C<sub>11</sub>H<sub>10</sub>N<sub>2</sub>O<sub>3</sub>; Theoretical [M+H]: 219.0691. Measured [M+H]: 219.0766.

**(2Z)-2-acetamido-3-(6-methoxypyridin-3-yl)prop-2-enoic acid (compound 15)**

The synthesis was performed according to a modified method previously published [4]. Briefly, a sample of (4Z)-4-[(6-methoxypyridin-3-yl)methylidene]-2-methyl-4,5-dihydro-1,3-oxazol-5-one (**compound 14**) (2 g, 9.16 mmol) was dissolved in a mixture of water (30 mL)/acetone (50 mL) and the resulting mixture was refluxed for 9 hrs. The solution was allowed to cool down to RT and then was concentrated, under reduced pressure, forming the crude product as yellow solid. The crude product was purified by recrystallization from methanol affording **compound 15** as pale brown crystals (1.76 g, 7.45 mmol, 81%). Mp: 162-164°C. <sup>1</sup>H-NMR (400 MHz, DMSO-*d*<sub>6</sub>,)  $\delta_H$ = 2.00 (s, 3H, H-10), 3.89 (s, 3H, H-13), 6.88 (d, J= 8.8 Hz, 1H, H-3), 7.25 (s, 1H, H-7), 7.98 (dd, J= 2.4 Hz, J= 8.8 Hz, 1H, H-4), 8.40 (d, J= 2.4 Hz, 1H, H-6), 9.48 (s, 1H, H-12) ppm; <sup>13</sup>C-NMR (100 MHz, DMSO-*d*<sub>6</sub>,)  $\delta_C$ = 23.2 (C-10), 54.0 (C-13), 111.1 (C-3), 124.1 (C-7), 127.1 (C-5), 128.7 (C-8), 139.8 (C-4), 149.7 (C-6), 164.1 (C-10), 166.8 (C-9), 169.7 (C-2) ppm. HRMS (ESI) for C<sub>11</sub>H<sub>12</sub>N<sub>2</sub>O<sub>4</sub>; Theoretical [M+H]: 237.0797. Measured [M+H]: 237.0871.

**rac-2-acetamido-3-(6-methoxypyridin-3-yl)propanoic acid (compound 16)**

In a suspension of (2Z)-2-acetamido-3-(6-methoxypyridin-3-yl)prop-2-enoic acid (**compound 15**) (1.76 g, 7.45 mmol) in methanol (50 mL), Pd/C (10%) was added. The reaction mixture was stirred under hydrogen gas at RT for 9 hrs. Upon completion of the reaction, the solution mixture was filtrated over a pad of Celite forming a yellow oil which was concentrated under reduced pressure. The resulting slurry was purified by automated flash chromatography column

(Isolera<sup>TM</sup> Biotech) (SiO<sub>2</sub>);  $R_f = 0.89$  (dichloromethane: methanol 9:1; UV light) affording compound **compound 16** as a pale-yellow oil which was solidified on standing (940 mg, 3.94 mmol, 53%). Mp: 181-183°C. <sup>1</sup>H-NMR (400 MHz, CD<sub>3</sub>OD)  $\delta_H = 2.01$  (3H, s, H-10), 2.95-2.30 (1H, m, H-7), 3.20-3.25 (m, 1H, H-7), 3.95 (s, 3H, H-13), 4.70-4.73 (m, 1H, H-8), 6.83 (d,  $J = 8.4$  Hz, 1H, H-3), 7.67 (dd,  $J = 2.4$  Hz,  $J = 8.4$  Hz, 1H, H-4), 8.15 (d,  $J = 2.4$  Hz, 1H, H-6) ppm; <sup>13</sup>C-NMR (100 MHz, CD<sub>3</sub>OD)  $\delta_C = 21.6$  (C-10), 34.1 (C-7), 53.4 (C-13), 54.1 (C-8), 110.7 (C-3), 126.4 (C-4), 140.7 (C-5), 147.2 (C-6), 164.0 (C-2), 172.5 (C-11), 173.7 (C-9) ppm. HRMS (ESI) for C<sub>11</sub>H<sub>14</sub>N<sub>2</sub>O<sub>4</sub>; Theoretical [M+H]: 238.0953. Measured [M+H]: 238.0961.

***rac*-5-(2-carboxy-2-acetamidoethyl)-2-methoxypyridin-1-ium-1-olate (compound 17)**

In a suspension of 2-acetamido-3-(6-methoxypyridin-3-yl)propanoic acid (**compound 16**) (560 mg, 2.35 mmol, 1 eq) in a solution mixture of dichloromethane/methanol (9:1, 30mL) a sample of *m*-chloroperoxy benzoic acid (1 g, 5.8 mmol, 2.5eq) was added. The resulting mixture was stirred at RT for 48 hrs under nitrogen atmosphere. Upon completion of the reaction, the solvents were removed under reduced pressure and the resulting yellowish slurry residue was washed several times with diethyl ether. Filtration of the product led to isolation of the title compound as a white powder (460 mg, 1.80 mmol, 77%). Mp: 189-192°C. <sup>1</sup>H-NMR (400 MHz, DMSO-*d*<sub>6</sub>)  $\delta_H = 1.79$  (s, 3H, H-10), 2.71-2.77 (m 1H, H-7), 2.95-2.99 (m, 1H, H-7), 3.93 (s, 3H, H-13), 4.38-4.43 (m, 1H, H-8), 7.13 (d,  $J = 8.7$  Hz, 1H, H-12), 7.23 (dd,  $J = 2.0$  Hz,  $J = 8.7$  Hz, 1H, H-3), 8.11 (d,  $J = 2.0$  Hz, 1H, H-6), 8.23 (1H, d,  $J = 8.7$  Hz, H-4) ppm; <sup>13</sup>C-NMR (100 MHz, DMSO-*d*<sub>6</sub>)  $\delta_C = 22.8$  (C-10), 33.2 (C-7), 53.2 (C-8), 57.5 (C-13), 109.0 (C-3), 128.1 (C-6), 128.3 (C-5), 139.9 (C-4), 157.5 (C-2), 169.8 (C-11), 173.2 (C-9) ppm. HRMS (ESI) for C<sub>11</sub>H<sub>14</sub>N<sub>2</sub>O<sub>5</sub>; Theoretical [M+H]: 254.0902. Measured [M+H]: 254.0912.

***rac*- 2-amino-3-(1-hydroxy-6-oxo-1,6-dihydropyridin-3-yl)propanoic acid (compound 18)**

A sample of *rac*-5-(2-carboxy-2-acetamidoethyl)-2-methoxypyridin-1-ium-1-olate (**compound 17**) (460 mg, 1.80 mmol) was dissolved in concentrated solution of HCl (20 mL).

The resulting mixture was refluxed for 3 hrs. Upon completion of the reaction, the mixture was concentrated to dryness leading to the formation of brownish crystals the target molecule (300 mg, 1.51 mmol, 84%). Mp: 120-122°C. <sup>1</sup>H-NMR (400 MHz, D<sub>2</sub>O/CF<sub>3</sub>COOD 8:2) δ<sub>H</sub>= 2.96-3.10 (2H, m, H-7), 4.13 (d, J= 4.8 Hz, 1H, H-8), 6.63 (t, J= 9.2 Hz, 1H, H-4), 7.43 (d, J= 9.2 Hz, 1H, H-3), 7.94 (s, 1H, H-6), 8.49 (s, 3H, H-10) ppm; <sup>13</sup>C-NMR (100 MHz, D<sub>2</sub>O/CF<sub>3</sub>COOD 8:2) δ<sub>C</sub>= 31.4 (C-7), 52.9 (C-8), 118.9 (C-3), 136.6 (C-5), 140.7 (C-6), 140.8 (C-4), 157.8 (C-2), 170.4 (C-9) ppm. A small portion of the titled molecule was dissolved in water and basified (pH 5.0) with ammonium hydroxide solution and kept at 5°C for several weeks until precipitation. HRMS (ESI) for C<sub>8</sub>H<sub>10</sub>N<sub>2</sub>O<sub>4</sub>; Theoretical [M+H]: 199.0713. Measured [M+H]: 199.0711.

### Synthesis of *L*-22 and *D*-23

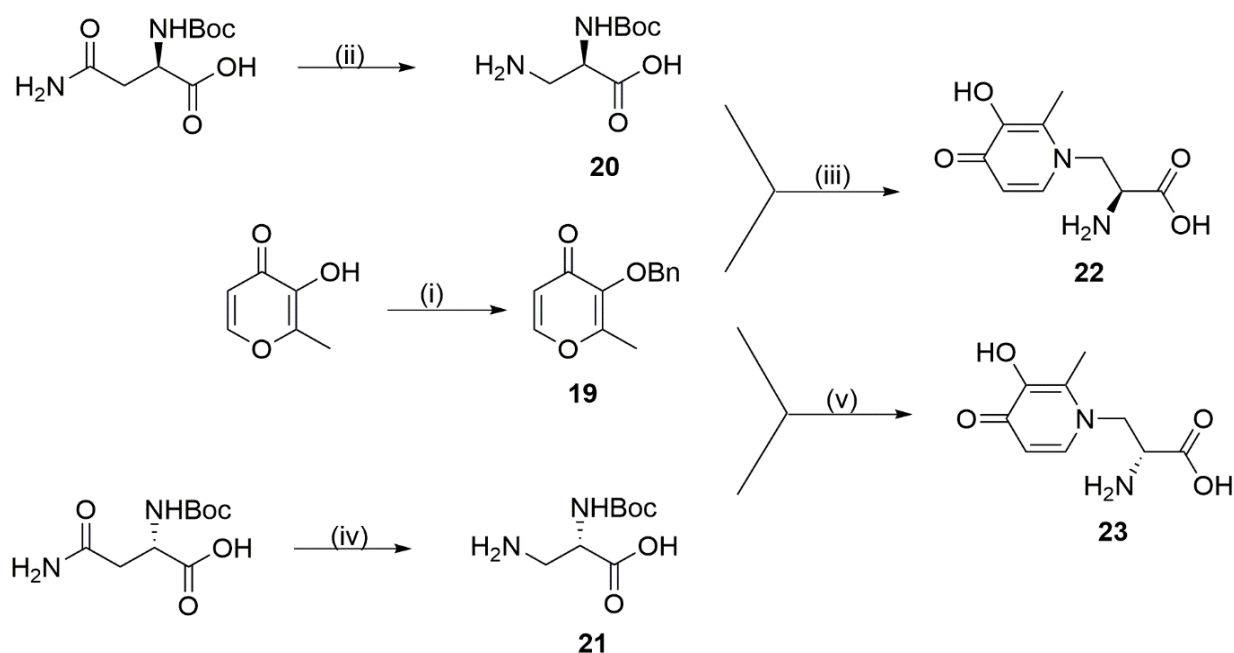

**Scheme 3:** Reagents and conditions for the synthesis of **compounds 22 and 23**. (i) BnBr, K<sub>2</sub>CO<sub>3</sub>, DMF, 80°C, 1 hr, 76%; (ii) **a**) *N*-Boc-L-Asn, Iodosobenzene diacetate, EtOAc: MeCN: H<sub>2</sub>O, RT, 4hrs, 76%; (iii) **a**) EtOH: H<sub>2</sub>O, 8 days, **b**) conc. HBr, reflux, 20 mins, **c**) NH<sub>3</sub>, pH 5, 5°C/72 hrs, 63%. Same reagents and conditions for step *iv* (90%) and *v* (47%).

### 3-(benzyloxy)-2-methyl-1,4-dihydropyridin-4-one (compound 19) [7]

In a solution of maltol (10 g, 79.26 mmol, 1eq) in *N,N*-dimethyl formamide (100 mL), benzyl bromide (9.42 mL, 79.26 mmol, 1eq) was added and the solution mixture was stirred at 80°C for 15 min. Then, a sample of potassium carbonate (12.05 g, 87.18 mmol, 1.1eq) was added to the reaction mixture and the final mixture was heated at 80°C for a further 1 hr. Upon completion of the reaction, the excess of inorganic salt was removed by filtration and the filtrates were concentrated under reduced pressure. The resulting residue was dissolved in tetrahydrofuran (50mL) and any remaining of the inorganic salt was removed by filtration. Then, the filtrates were concentrated under reduced pressure affording the titled compound as a viscous orange oil (16.28 g, 75.29 mmol, 95%). <sup>1</sup>H-NMR (400 MHz, CDCl<sub>3</sub>) δ<sub>H</sub>= 2.07 (s, 3H, H-6), 5.13 (s, 2H, H-7), 6.37 (d, J= 5.6 Hz, 1H, H-1), 7.28-7.39 (m, 5H, H-9, H-10, H-11), 7.60 (d, J= 5.6 Hz, 1H, H-2) ppm; <sup>13</sup>C-NMR (100 MHz, CDCl<sub>3</sub>) δ<sub>C</sub>= 14.6 (C-6), 73.3 (C-7),

116.8 (C-1), 128.2 (Ar), 128.3 (Ar), 128.8 (Ar), 136.7 (Ar), 143.6 (C-4), 153.9 (C-2), 159.8 (C-3), 175.02 (C-5) ppm.

**(2L)-3-amino-2-[[tert-butoxy]carbonyl]amino}propanoic acid (compound 20) [5]**

In a solution mixture composed of ethyl acetate (24 mL), acetonitrile (24 mL) and water (12 mL), *N*-Boc-*L*-asparagine (5.0 g, 21.5 mmol, 1eq) and iodosobenzene diacetate (8.32 g, 25.8 mmol, 1.2eq) were added. The resulting slurry, was stirred at 16°C for 30 min and then at 20°C for 4 hrs. Upon completion of the reaction, the mixture was cooled at 0°C for 15 min forming a white salt which was collected by filtration. The filter-cake was then washed with cooled ethyl acetate (30 mL) affording compound 20 as a white solid (3.34 g, 16.35 mmol, 76%). Mp. 203-207°C [lit: 207-212°C] [5]. <sup>1</sup>H-NMR (400 MHz, DMSO-*d*<sub>6</sub>) δ<sub>H</sub>= 1.38 (s, 9H, H-6), 2.67-2.73 (m, 1H, H-3), 2.99-3.02 (m, 1H, H-3), 3.57-3.61 (m, 2H, H-2), 6.16 (s, br, 1H, H-7) ppm; <sup>13</sup>C-NMR (100 MHz, DMSO-*d*<sub>6</sub>) δ<sub>C</sub>= 28.6 (C-6), 41.2 (C-3), 51.3 (C-2), 78.7 (C-5), 155.6 (C-4), 171.6 (C-1) ppm.

**(2D)-3-amino-2-[[tert-butoxy]carbonyl]amino} propanoic acid (compound 21) [5]**

Same procedure as for (2L)-3-amino-2-[[tert-butoxy]carbonyl]amino}propanoic acid (**compound 20**) was followed. White crystals (3.94 g, 19.3 mmol, 90%). Mp: 200-204°C [lit: 207-209°C] [5]. <sup>1</sup>H-NMR (400 MHz, DMSO-*d*<sub>6</sub>) δ<sub>H</sub>= 1.39 (s, 9H, H-6), 2.68-2.74 (m, 1H, H-3), 2.99-3.03 (m, 1H, H-3), 3.57-3.62 (m, 2H, H-2), 6.15 (s, br, 1H, H-7) ppm; <sup>13</sup>C-NMR (100 MHz, DMSO-*d*<sub>6</sub>) δ<sub>C</sub>= 28.5 (C-6), 41.4 (C-3), 51.6 (C-2), 78.6 (C-5), 155.6 (C-4), 171.6 (C-1) ppm.

**(2L)-amino-3-(3-hydroxy-2-methyl-4-oxo-1,4-dihydropyridin-1-yl)propanoic acid**

**(compound 22)**

The synthesis was performed according to a modified method previously published [1]. A sample of 3-(benzyloxy)-2-methyl-1,4-dihydropyridin-4-one (**compound 19**) (4.9 g, 22.66 mmol, 1eq) was mixed with a sample of (2L)-2-amino-2-[[tert-butoxy]carbonyl]amino}acetic

acid (**compound 20**) (2.9 g, 14.2 mmol, 0.6eq.) and dissolved in water (100 mL) and ethanol (100 mL) containing sodium hydroxide (2 g, 50 mmol). The resulting solution was allowed to stir at RT for 8 days. Then, the solution was acidified to pH 2.0 by the addition of concentrated HCl. The excess of solvents was removed under reduced pressure. The resulting residue was mixed with hydrobromic acid (48% w/v, 20 mL) and refluxed for 20 min. The solution mixture was concentrated under reduced pressure, and then the resulting solid was dissolved in water (20 mL), treated with charcoal and basified (pH 5.0) by the addition of ammonium hydroxide solution. The resulting solution was cooled to 5°C for 72 hrs, where brown crystals were precipitated. The crystals were collected washed with excess of water and dried on air affording the titled compound as pale brown crystals (3.23 g, 14.27 mmol, 63%). Mp: 165-168°C. <sup>1</sup>H-NMR (400 MHz, D<sub>2</sub>O/CF<sub>3</sub>COOD) δ<sub>H</sub>= 1.90 (s, 3H, H-6), 3.85 (t, J= 7.2 Hz, 1H, H-8), 4.07-4.12 (m, 1H, H-7), 4.27-4.33 (m, 1H, H-7), 6.44 (d, J= 8 Hz, 1H, H-2), 7.36 (d, J= 8 Hz, 1H, H-1) ppm; <sup>13</sup>C-NMR (100 MHz, D<sub>2</sub>O/CF<sub>3</sub>COOD) δ<sub>C</sub>= 13.4 (C-6), 49.17 (C-7), 52.24 (C-8), 119.54 (C-2), 141.59 (C-1), 143.28 (C-5), 147.33 (C-4), 170.96 (C-8), 176.7 (C-3) ppm. HRMS (ESI) for C<sub>9</sub>H<sub>12</sub>N<sub>2</sub>O<sub>4</sub>; Theoretical [M+H]: 213.0869. Measured [M+H]: 213.0866.

**2-amino-3-(3-hydroxy-2-methyl-4-oxo-1,4-dihydropyridin-1-yl)propanoic acid (compound 23)**

Same procedure was followed as for the one described for (2*D*)-amino-3-(3-hydroxy-2-methyl-4-oxo-1,4-dihydropyridin-1-yl)propanoic acid (**compound 21**). Pale brown crystals after recrystallization from water/methanol (1.78 g, 8.43 mmol, 47%). Mp: 163-168°C. <sup>1</sup>H-NMR (400 MHz, D<sub>2</sub>O/CF<sub>3</sub>COOD) δ<sub>H</sub>= 1.92 (s, 3H, H-6), 3.91 (t, J= 7.2 Hz, 1H, H-8), 4.23-4.29 (m, 1H, H-7), 4.49-4.55 (m, 1H, H-7), 6.37 (d, J= 8 Hz, 1H, H-2), 7.48 (d, J= 8 Hz, 1H, H-1) ppm; <sup>13</sup>C-NMR (100 MHz, D<sub>2</sub>O/CF<sub>3</sub>COOD) δ<sub>C</sub>= 13.4 (C-6), 49.2 (C-7), 52.2 (C-8), 119.54 (C-2), 141.7 (C-1), 143.3 (C-5), 147. (C-4), 170.9 (C-8), 176.7 (C-3) ppm. HRMS (ESI) for C<sub>9</sub>H<sub>12</sub>N<sub>2</sub>O<sub>4</sub>; Theoretical [M+H]: 213.0869. Measured [M+H]: 213.0865



## Synthesis of *rac*-29

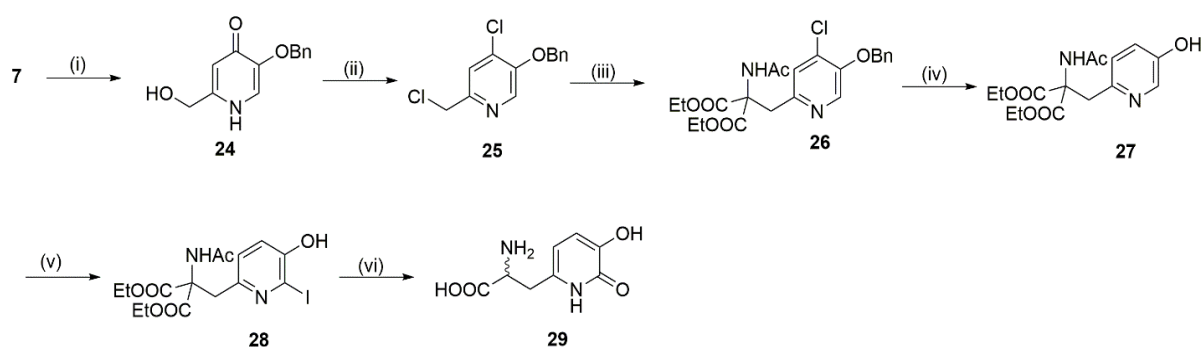

**Scheme 4:** Reagents and conditions for the synthesis of **compound 29**: (i) conc.  $\text{NH}_4\text{OH}$ , 5 hrs,  $120^\circ\text{C}$ , (ii)  $\text{POCl}_3$ , 40 mins,  $120^\circ\text{C}$ , (iii) Diethyl acetamidomalonate,  $\text{NaH}$  (60% in mineral oil),  $\text{DMF}_{(\text{dry})}$ , overnight, RT, (iv)  $\text{H}_2$ , 5%  $\text{Pd/C}$ , methanol, RT, (v)  $\text{Na}_2\text{CO}_3$  (aq),  $\text{I}_2$ ,  $\text{KI}$ , overnight, RT, (vi) a)  $\text{Ba}(\text{OH})_2$  (aq), 24 hrs,  $120^\circ\text{C}$ , 24 hrs b) conc.  $\text{HCl}$ ,  $180^\circ\text{C}$ , 1 hr, c) conc.  $\text{NH}_4\text{OH}$ , pH 5,  $5^\circ\text{C}$ .

## 5-(benzyloxy)-2-(hydroxymethyl)-1,4-dihydropyridin-4-one (**compound 25**) [6]

In a stainless-steel bomb, concentrated ammonium hydroxide (40 mL) was mixed with a sample of 5-(benzyloxy)-2-(hydroxymethyl)-4*H*-pyran-4-one (**compound 7**) (25 g, 107.64 mmol). The resulting mixture was heated at  $120^\circ\text{C}$  for 5 hrs. Upon completion of the reaction, volatiles were removed under reduced pressure. The resulting slurry was extracted with hot acetone, filtrated and washed with excess of hot acetone affording the titled compound as brown crystal (20 g, 86.48 mmol, 80%). M.p.  $228\text{--}232^\circ\text{C}$  [lit.  $230\text{--}235^\circ\text{C}$ ] [6].  $^1\text{H-NMR}$  (400 MHz,  $\text{DMSO-}d_6$ )  $\delta_{\text{H}} = 4.34$  (s, 2H, H-8), 5.00 (s, 2H, H-11), 6.23 (s, 1H, H-1), 7.25–7.35 (m, 6H, H-4, H-13, H-14, H-15) ppm;  $^{13}\text{C-NMR}$  (100 MHz,  $\text{DMSO-}d_6$ )  $\delta_{\text{C}} = 60.3$  (C-8), 70.9 (C-11), 112.0 (C-1), 124.0 (C-4), 128.2 (Ar), 128.3 (Ar), 128.4 (Ar), 128.7 (Ar), 128.8 (Ar), 137.8 (Ar), 147.0 (C-2), 149.7 (C-5), 171.6 (C-6) ppm.

## 5-(benzyloxy)-4-chloro-2-(chloromethyl)pyridine (**compound 25**) [6]

A sample of 5-(benzyloxy)-2-(hydroxymethyl)-1,4-dihydropyridin-4-one (**compound 24**) (13.84 g, 60 mmol) was added to a suspension of phosphorus oxychloride (42 mL), in portions, thus increasing the temperature of the reaction. After the solution mixture was returned back to RT, it was heated at  $150^\circ\text{C}$  for 40 min. Upon completion of the reaction, the mixture was

poured into ice-water and stirred vigorously. Addition of more ice into the stirred mixture enhanced the hydrolysis of phosphorous oxychloride and led to the precipitation of the pure product (**compound 19**) (14.5 g, 60 mmol, 87%) as a black solid which was isolated by filtration and left to dry overnight. Mp: 77-79°C [lit: 80-81°C] [6]. <sup>1</sup>H-NMR (400 MHz, DMSO-*d*<sub>6</sub>) δ<sub>H</sub>= 4.74 (s, 2H, H-7), 5.38 (s, 2H, H-8), 7.36-7.50 (m, 5H, H-10, H-11, H-12), 7.76 (s, 1H, H-1), 8.53 (s, 1H, H-4) ppm; <sup>13</sup>C-NMR (100 MHz, DMSO-*d*<sub>6</sub>) δ<sub>C</sub>= 45.4 (C-7), 71.5 (C-8), 125.7 (C-1), 128.2 (Ar), 128.4 (Ar), 128.8 (Ar), 129.1 (C-6), 133.1 (C-2), 135.5 (Ar), 136.2 (C-4), 149.4 (C-5), 150.8 (C-7) ppm.

**1,3-diethyl-2-{{5-(benzyloxy)-4-chloropyridin-2-yl}methyl}-2-acetamidopropane dioate (compound 26)** [6]

In dry *N,N*- dimethylformamide (62 mL) sodium hydride (60% in mineral oil, 2.16 g, 90 mmol, 1.7eq) was added. The solution was stirred at RT and then diethyl acetamidomalonate (11.25 g, 51.8 mmol, 1.7eq) was added in portion evolving hydrogen gas. Upon ceasing of hydrogen gas evolution, 5-(benzyloxy)-4-chloro-2-(chloromethyl) pyridine (**compound 25**) (13.84 g, 51.6 mmol, 1eq) was added. The resulting solution mixture was stirred overnight at RT. Upon completion of the reaction, acetic acid (25 mL) was added to neutralise the reaction mixture which was then concentrated, under reduced pressure, and the resulting syrup was dissolved in water (200mL) and extracted with diethyl ether (2 x 80 mL). The combined organic extracts were washed with brine, dried over magnesium sulphate and concentrated under reduced pressure, affording the titled compound as white crystals (22.7 g, 50.6 mmol, 98%), which was recrystallized from ethanol. Mp 119-122°C [Lit=118-120°C] [6]. <sup>1</sup>H-NMR (400 MHz, DMSO-*d*<sub>6</sub>) δ<sub>H</sub>= 1.18 (t, J= 7.2 Hz, 6H, H-12), 1.82 (s, 3H, H-9), 3.50 (s, 2H, H-6), 4.08 (q, J= 7.2 Hz, J= 14.4 Hz, 4H, H-11), 5.25 (s, 2H, H-13), 7.13 (1H, s, H-8), 7.30-7.44 (m, 5H, H-15, H-16, H-17), 8.02 (s, 1H, H-5), 8.34 (s. 1H, H-3) ppm; <sup>13</sup>C-NMR (100 MHz, DMSO-*d*<sub>6</sub>) δ<sub>C</sub>= 14.3 (C-12), 22.5 (C-9), 40.1 (C-6), 62.3 (C-11), 66.6 (C-13), 71.1 (C-7), 125.8 (C-5), 128.2 (C-1),

128.7 (Ar), 129.1 (Ar), 131.3 (Ar), 136.0 (Ar), 136.6 (C-3), 149.6 (C-2), 149.9 (C-4), 167.5 (C-10), 169.9 (C-8) ppm.

**1,3-diethyl 2-acetamido-2-[(5-hydroxypyridin-2-yl)methyl]propanedioate (compound 27)**

[6]

A suspension of diethyl 2-[[5-(benzyloxy)-4-chloropyridin-2-yl]methyl]-2-acetamidopropanedioate (**compound 26**) (6 g, 13.36 mmol, 1eq) in methanol (75 mL), sodium acetate (6 g, 73.14 mmol, 5.5eq) and a catalytic amount of 10% Pd/C was stirred vigorously under hydrogen atmosphere. Upon completion of the reaction, as indicated by TLC (SiO<sub>2</sub>, ethyl acetate 100%), the solution mixture was filtered over a pad of Celite, washed with methanol and diluted with water (150 mL) forming the titled compound as white crystals (2.94 g, 9.06 mmol, 68%) Mp: 152-154°C [Lit: 150-153°C] [6] <sup>1</sup>H-NMR (400 MHz, DMSO-*d*<sub>6</sub>) δ<sub>H</sub>= 1.1 (t, J= 7.2 Hz, 6H, H-12), 1.81 (s, 3H, H-9), 3.43 (s, 2H, H-6), 4.07 (q, J= 7.2 Hz, 4H, H-11), 6.78 (d, J= 8.8 Hz, 1H, H-5), 6.99 (dd, J= 3.2 Hz, J= 8.8 Hz, 1H, H-1), 7.87 (s, 1H, H-13), 7.91 (d, J= 3.2 Hz, 1H, H-3) ppm; <sup>13</sup>C-NMR (100 MHz, DMSO-*d*<sub>6</sub>) δ<sub>C</sub>= 14.3 (C-12), 22.6 (C-9), 39.9 (C-6), 66.8 (C-11), 69.0 (C-7) 122.8 (Ar), 125.1 (Ar), 137.6 (Ar), 146.5 (Ar), 152.8 (Ar), 167.7 (C-10), 169.7 (C-8) ppm.

**1,3-diethyl-2-acetamido-2-[(5-hydroxy-6-iodopyridin-2-yl)methyl] propanedioate**

**(compound 28)** [6]

A sample of diethyl 2-acetamido-2-[(5-hydroxypyridin-2-yl)methyl] propanedioate (2.5 g, 7.7 mmol, 1eq) (**compound 27**) was dissolved in water (70 mL) containing sodium carbonate (1.54 g, 13.97 mmol, 1.8eq). A solution of iodine (1.92 g, 15.13 mmol, 2eq) and potassium iodide (2.32 g, 13.97 mmol) in water (50 mL) was added dropwise to the previous solution. The resulting mixture was stirred overnight at RT. Upon completion of the reaction, the solution mixture was neutralised with glacial acetic acid (5 mL), leading to the precipitation of the titled compound which was collected by filtration, washed with water and dried at 90°C. The titled

compound (**compound 28**) was obtained as a white powder (3.39 g, 7.54 mmol, 98%) M.p: 200-203°C. [Lit: 196-197°C] [6]. <sup>1</sup>H-NMR (400 MHz, DMSO-*d*<sub>6</sub>) δ<sub>H</sub>= 1.15 (t, J= 7.2 Hz, 6H, H-13), 1.83 (s, 3H, H-10), 3.34 (s, 2H, H-6), 4.11 (q, J= 7.2 Hz, 4H, H-13), 6.78 (d, J= 8 Hz, 1H, H-5), 6.98 (d, J= 8 Hz, 1H, H-1), 7.9 (s, 1H, H-8) ppm; <sup>13</sup>C-NMR (100 MHz, DMSO-*d*<sub>6</sub>) δ<sub>C</sub>= 14.4 (C-13), 22.5 (C-10), 39.0 (C-6), 62.2 (C-11), 66.8 (C-7), 111.1 (Ar), 121.7 (Ar), 125.1 (Ar), 148.0 (Ar), 153.2 (Ar), 167.5 (C-9), 169.9 (C-11) ppm.

**rac-2-amino-3-(5-hydroxy-6-oxo-1,6-dihydropyridin-2-yl)propanoic acid (compound 29)**  
[6]

A mixture of barium hydroxide (7.1 g, 41.43 mmol, 4.7eq) and diethyl 2-acetamido-2-[(5-hydroxy-6-iodopyridin-2-yl)methyl] propanedioate (**compound 28**) (4 g, 8.88 mmol, 1eq) in water (70 mL) was refluxed for 24 hrs. Upon completion of the reaction, the resulting barium salt was collected and refluxed with concentrated HCl (50 mL) for 1 hr. Once again, upon completion of the reaction, the solution mixture was evaporated to dryness yielding a yellowish salt of the crude product which was dissolved in water (20 mL), treated with charcoal and filtered. The pH of the filtrates was adjusted to 5.0 by addition of concentrated ammonia leading to precipitation of the titled compound appearing as white crystals (1.67 g, 8.44 mmol, 95%) M.p: 193-195°C. [Lit: 196-197°C] [6]. <sup>1</sup>H-NMR (400 MHz, DMSO-*d*<sub>6</sub>) δ<sub>H</sub>= 2.86-2.99 (m, 2H, H-6), 4.07 (t, J= 7.6 Hz, 1H, H-7), 6.06 (d, J= 7.2 Hz, 1H, H-5), 6.75 (d, J= 7.2 Hz, 1H, H-1) ppm; <sup>13</sup>C-NMR (100 MHz, DMSO-*d*<sub>6</sub>) δ<sub>C</sub>= 32.4 (C-6), 52.0 (C-7), 110.8 (C-5), 121.2 (C-1), 131.3 (C-2), 144.7 (C-4), 159.0 (C-3), 170.3 (C-8) ppm. HRMS (ESI) for C<sub>9</sub>H<sub>10</sub>N<sub>2</sub>O<sub>4</sub>; Theoretical [M+H]: 213.0869. Measured [M+H]: 213.0866.

# PROOF OF PRODUCTS PURITY BY HPLC

Method: 100% H<sub>2</sub>O with 5% ACN isocratic for 20 mins with flowrate of 1 mL.min<sup>-1</sup>. Sample injection volume: 50 µL. Column temperature: 28 °C

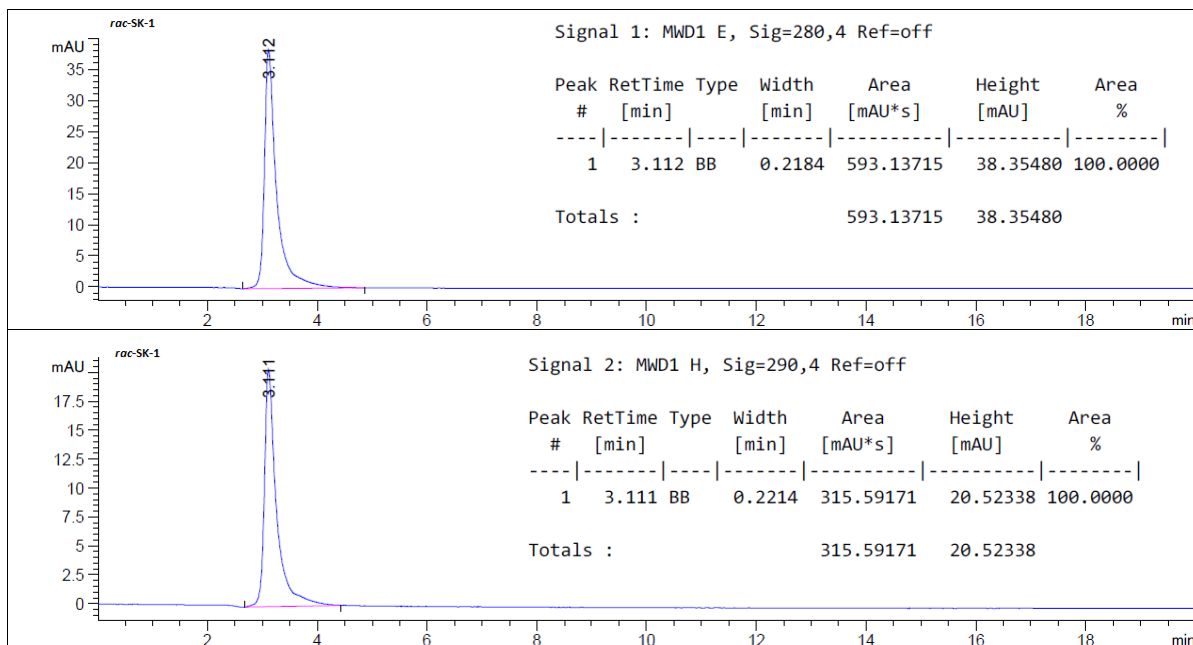

Figure S1: Analytical HPLC chromatogram of compound 10

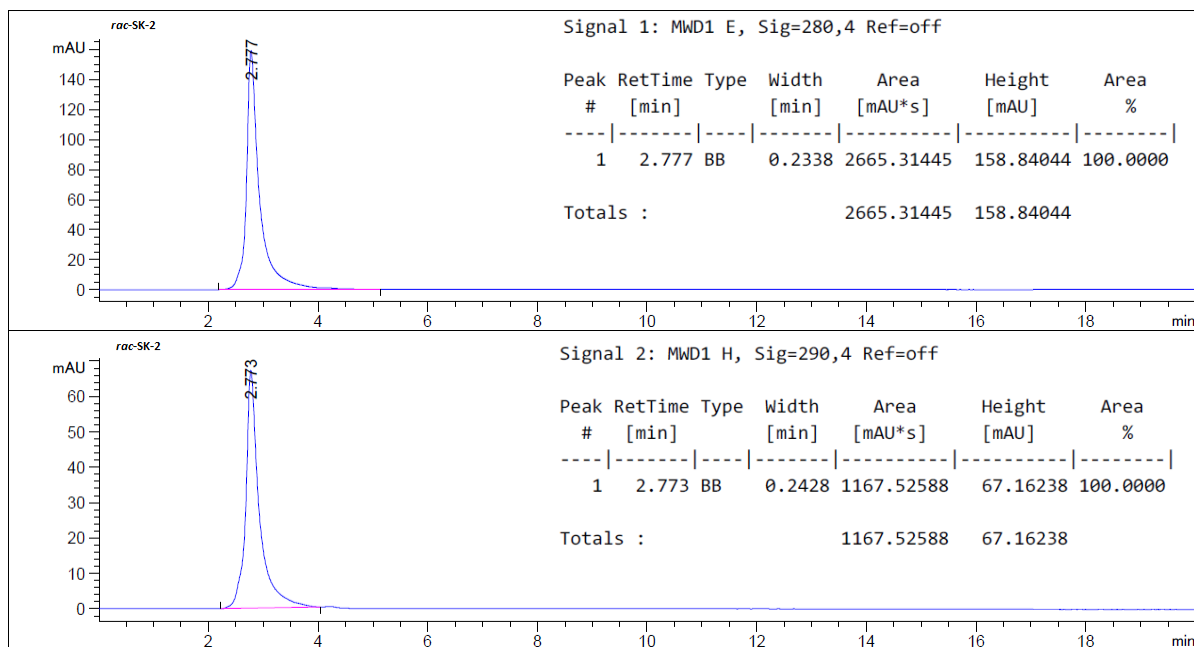

Figure S2: Analytical HPLC chromatogram of compound 11

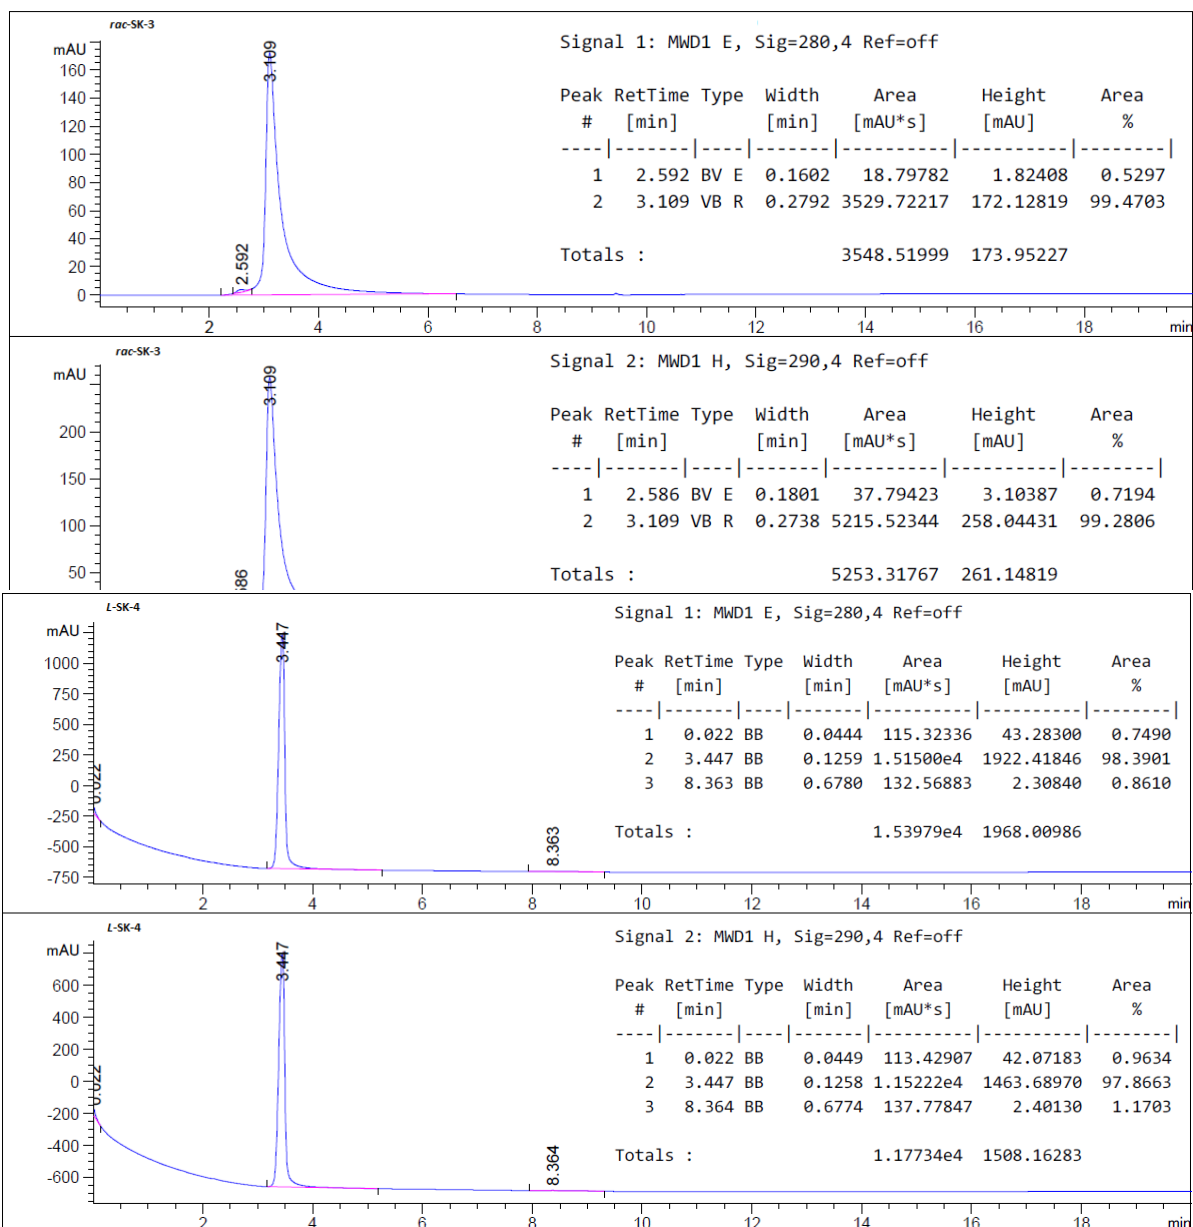

Figure S4: Analytical HPLC chromatogram of compound 22

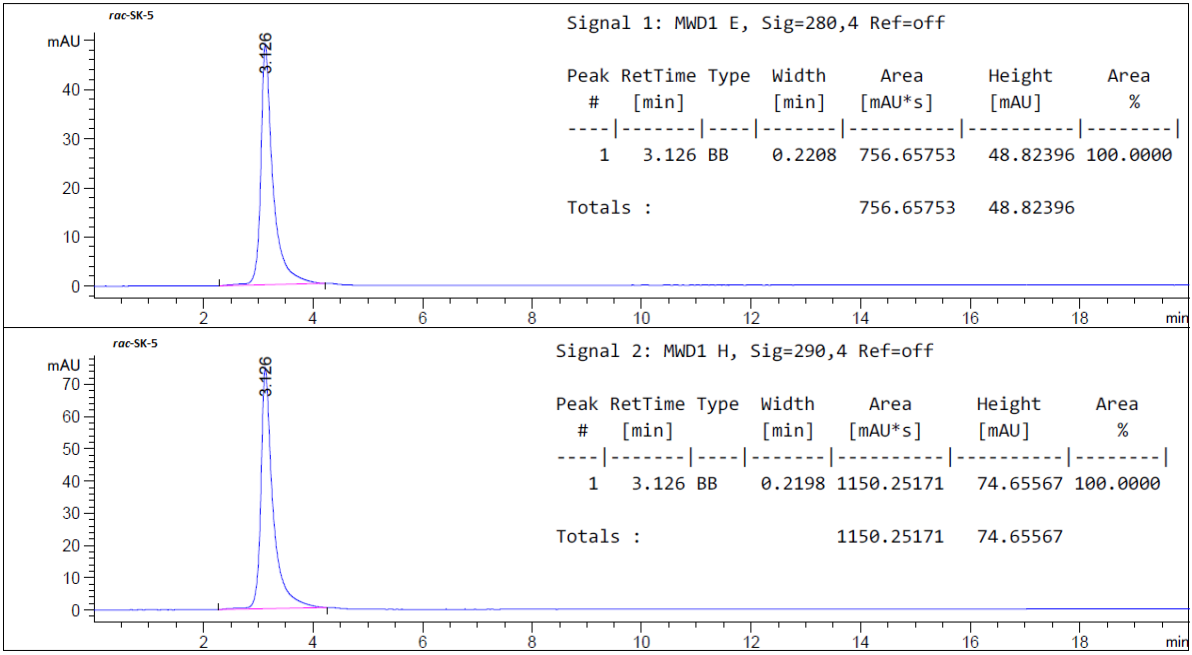

Figure S5: Analytical HPLC chromatogram of compound 29

$^1\text{H}$  AND  $^{13}\text{C}$ -NMR FOR ALL INTERMEDIATES AND FINAL PRODUCTS;  
HRMS FOR NOVEL COMPOUNDS AND FINAL PRODUCTS



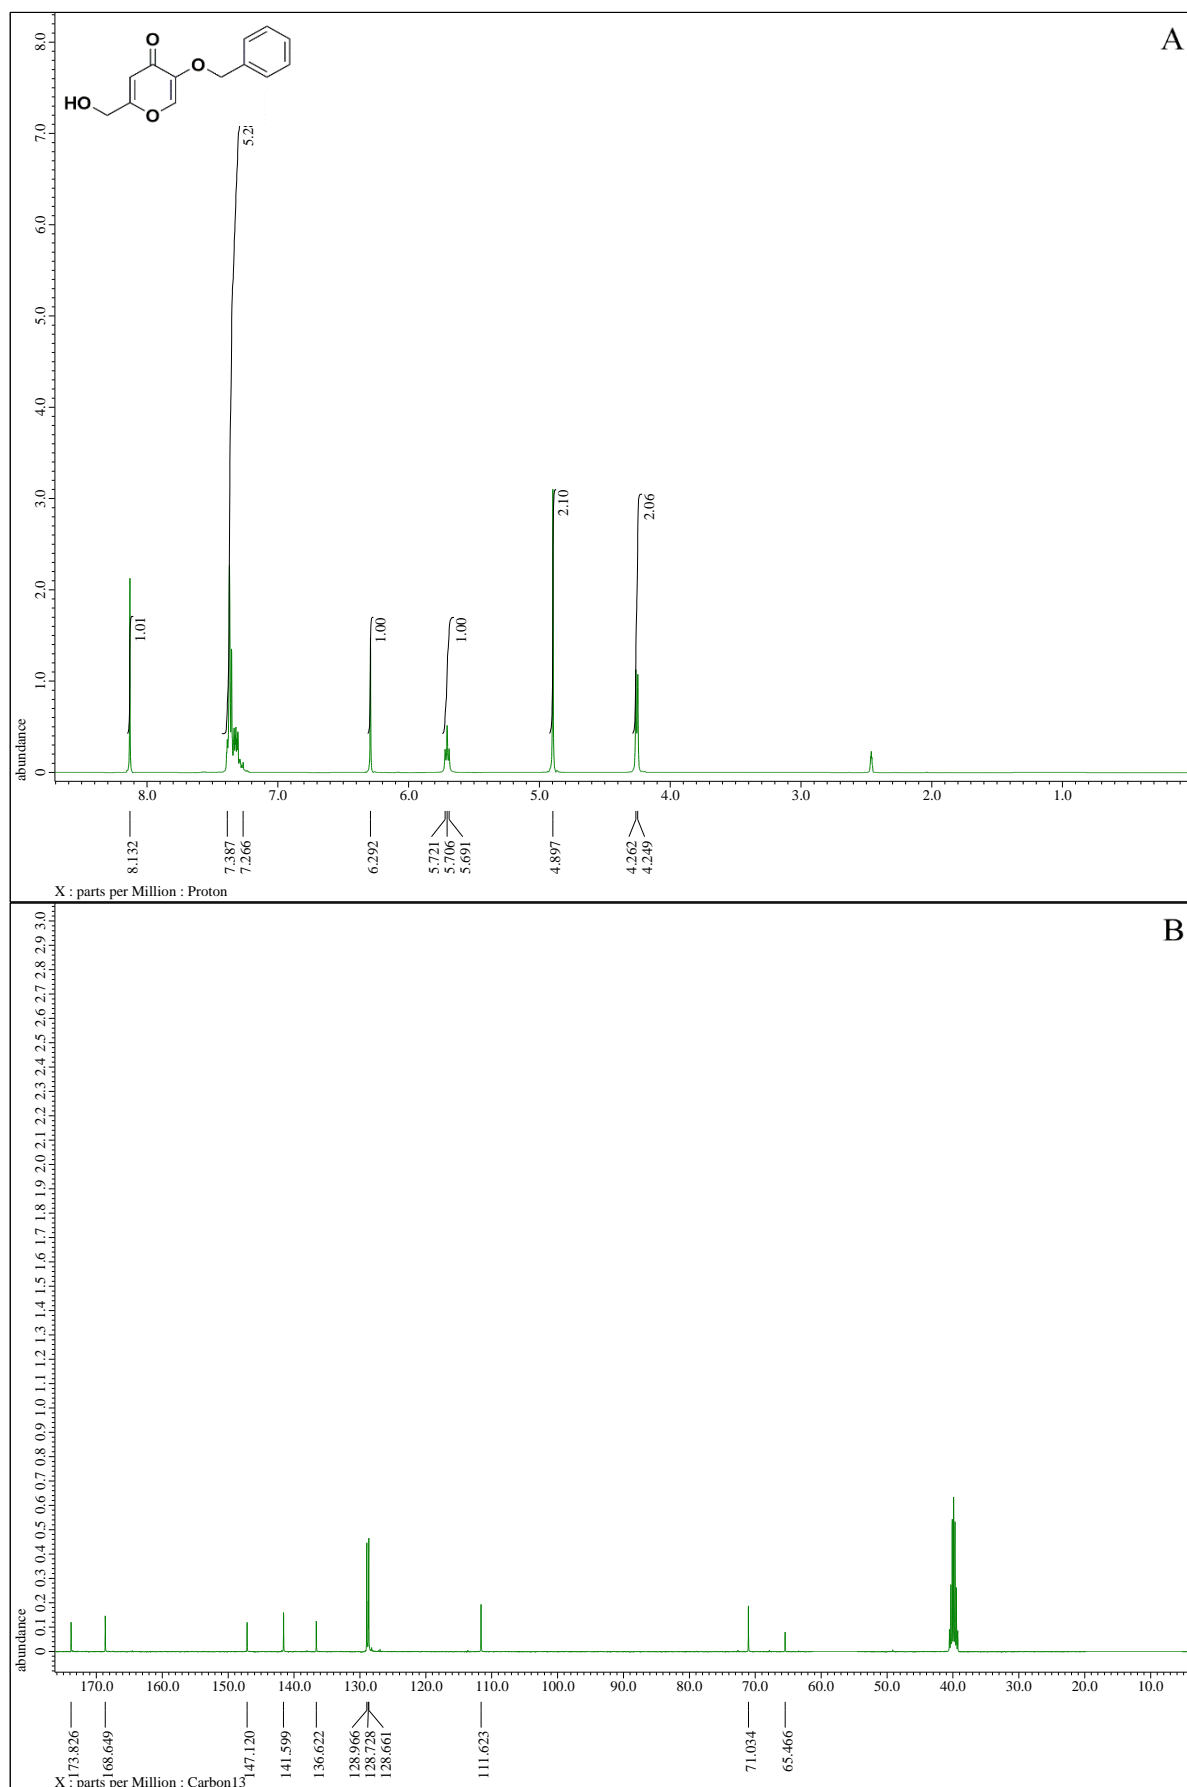

**Figure S6: (A)  $^1\text{H}$ -NMR spectra of 5-(benzyloxy)2-(hydroxymethyl)-4H-pyran-4-one (7) at 400 MHz in  $\text{DMSO-d}_6$  and (B)  $^{13}\text{C}$ -NMR spectra of 5-(benzyloxy)2-(hydroxymethyl)-4H-pyran-4-one (7) at 100 MHz in  $\text{DMSO-d}_6$ .**

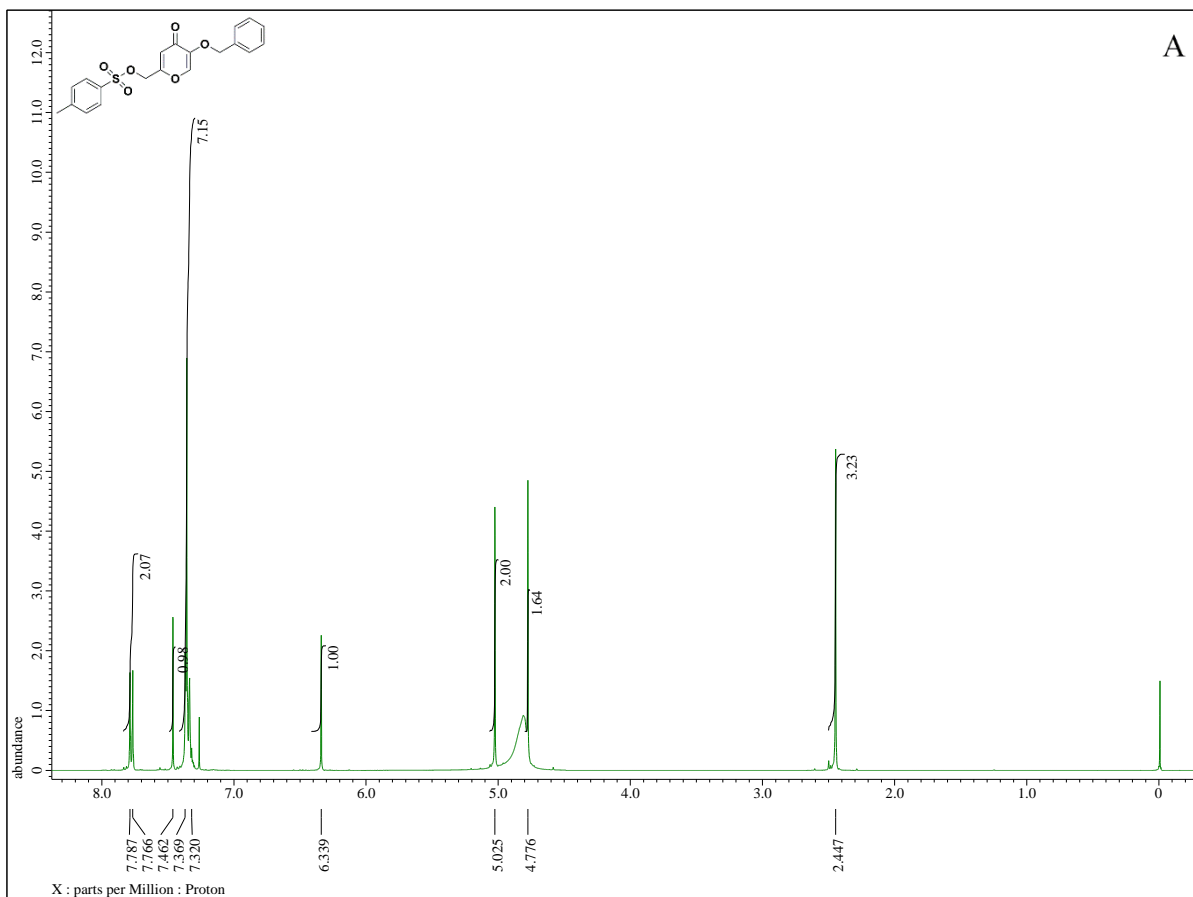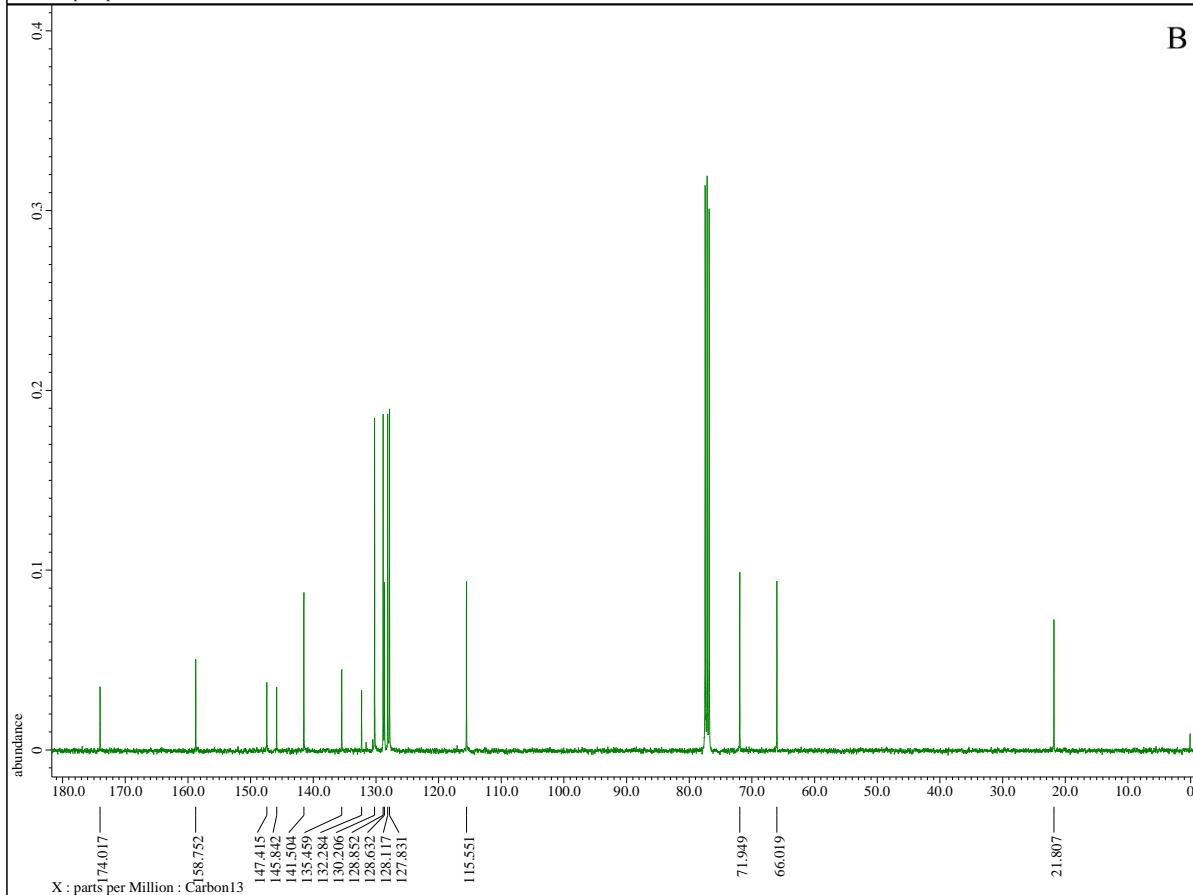

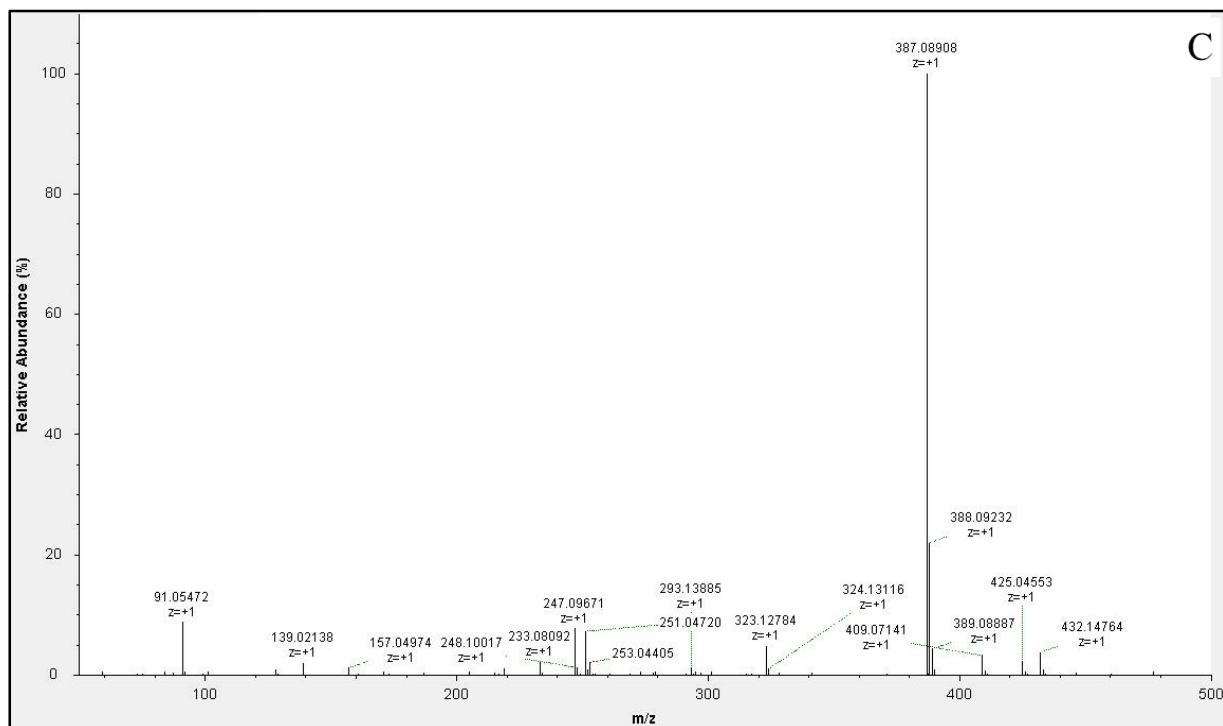

**Figure S7:** (A)  $^1\text{H}$ -NMR spectra of [5-(benzyloxy)-4-oxo-4H-pyran-2-yl]methyl 4-methylbenzene-1-sulfonate (**8**) at 400 MHz in  $\text{CDCl}_3$ , (B)  $^{13}\text{C}$ -NMR spectra of [5-(benzyloxy)-4-oxo-4H-pyran-2-yl]methyl 4-methylbenzene-1-sulfonate (**8**) at 100 MHz in  $\text{CDCl}_3$  and (C) HRMS of [5-(benzyloxy)-4-oxo-4H-pyran-2-yl]methyl 4-methylbenzene-1-sulfonate (**8**).

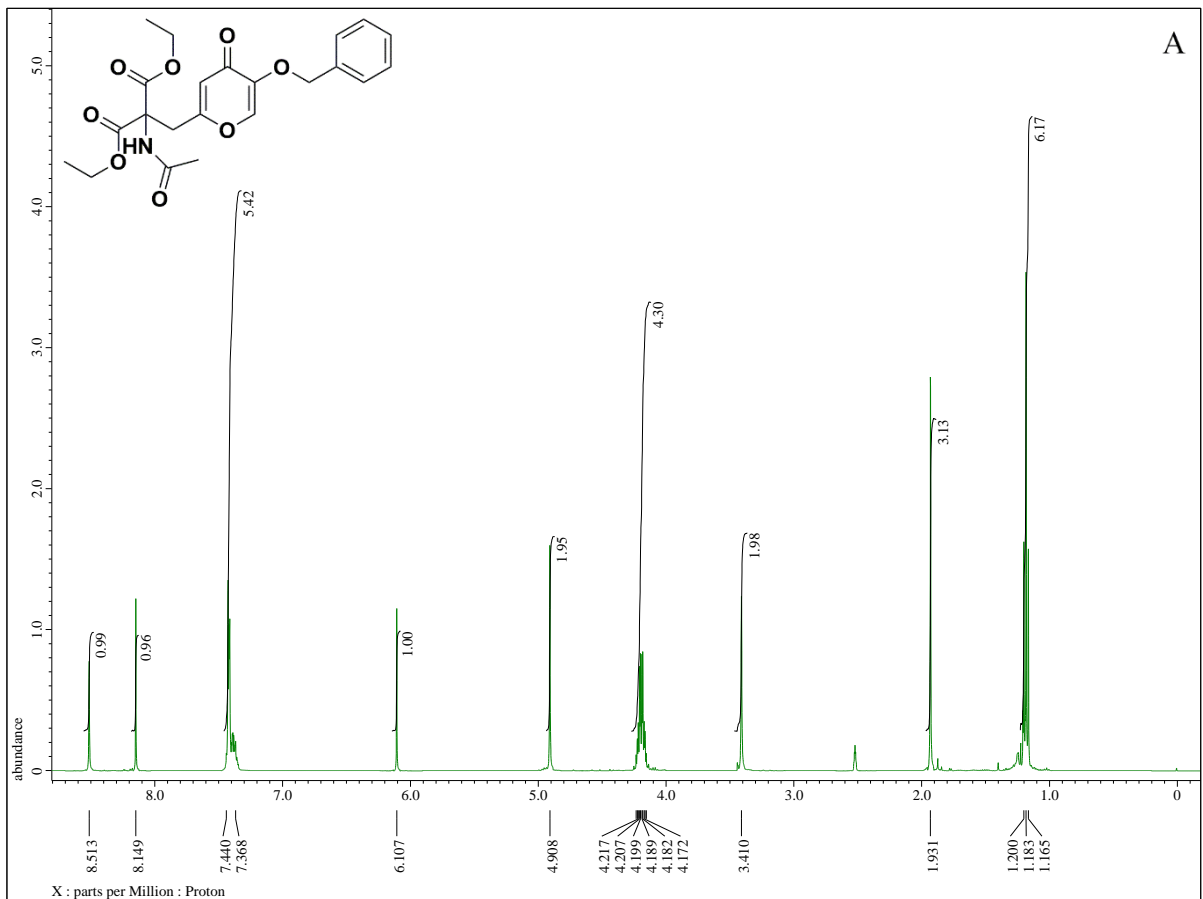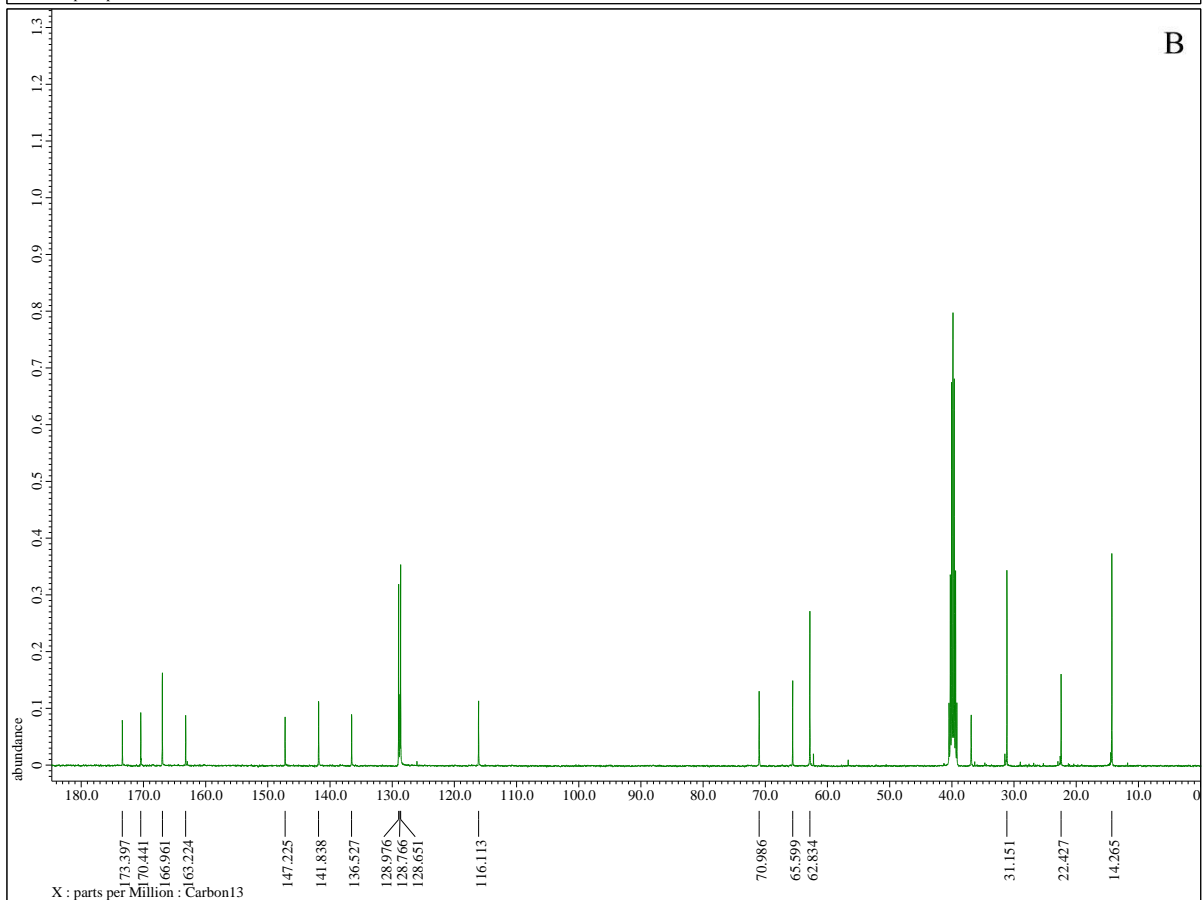

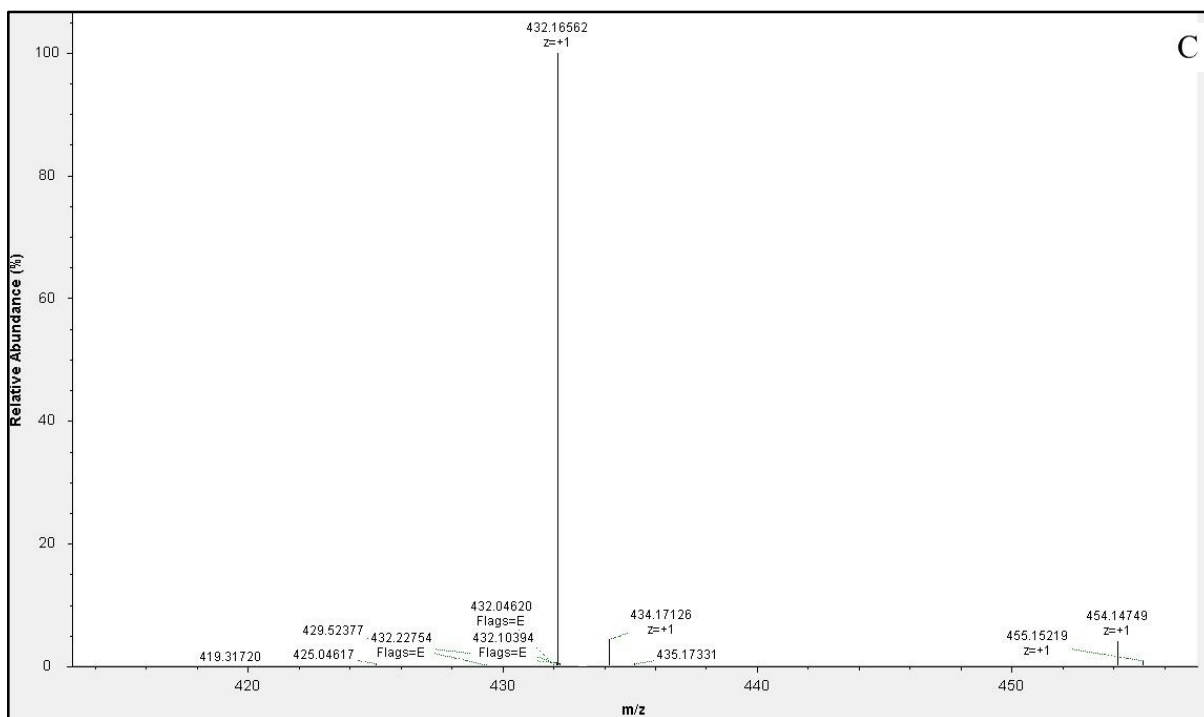

**Figure S8: (A)  $^1\text{H}$ -NMR spectra of 1,3-diethyl 2-[[5-(benzyloxy)-4-oxo-4H-pyran-2-yl]methyl]-2-acetamidopropanedioate (9) at 400 MHz in  $\text{DMSO-d}_6$  and (B)  $^{13}\text{C}$ -NMR spectra of 1,3-diethyl 2-[[5-(benzyloxy)-4-oxo-4H-pyran-2-yl]methyl]-2-acetamidopropanedioate (9) at 100 MHz in  $\text{DMSO-d}_6$  and (C) HRMS of 1,3-diethyl 2-[[5-(benzyloxy)-4-oxo-4H-pyran-2-yl]methyl]-2-acetamidopropanedioate (9)**

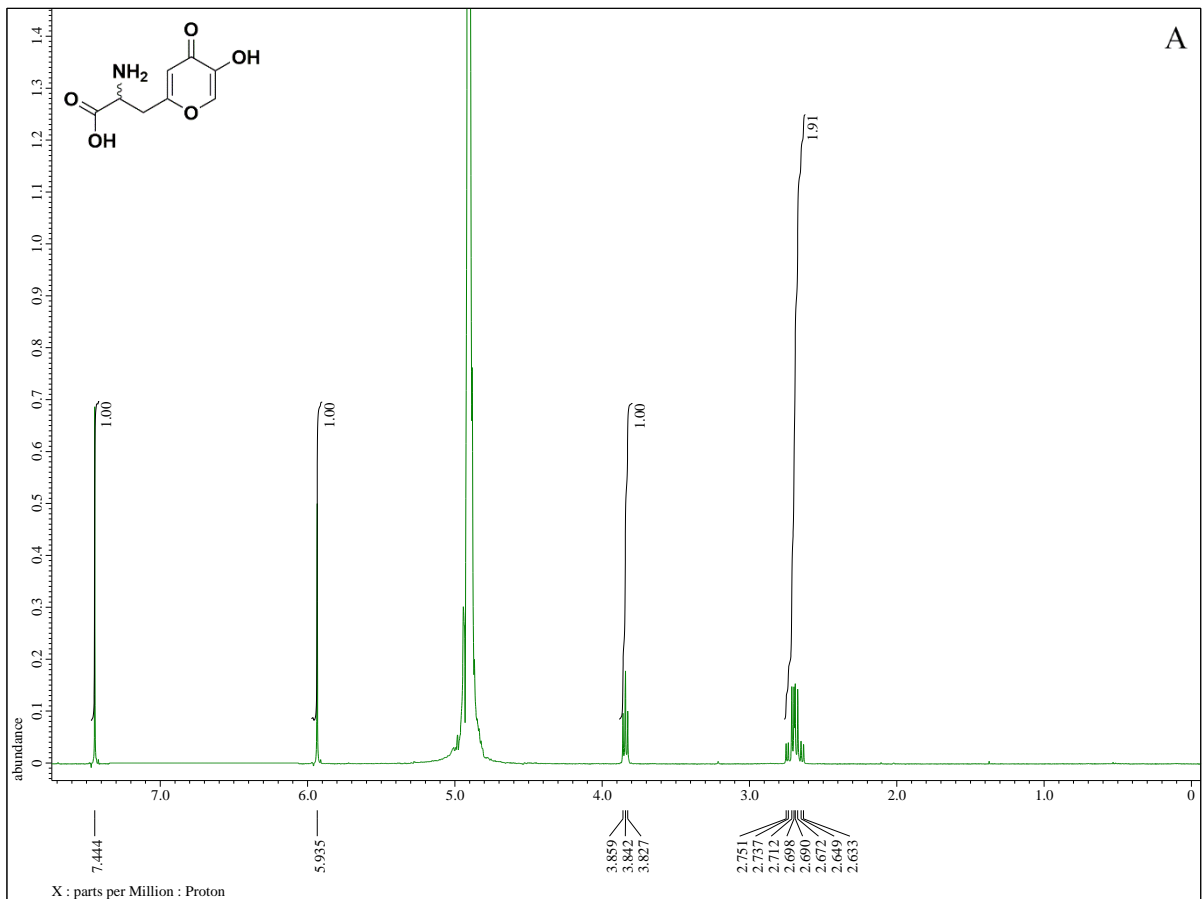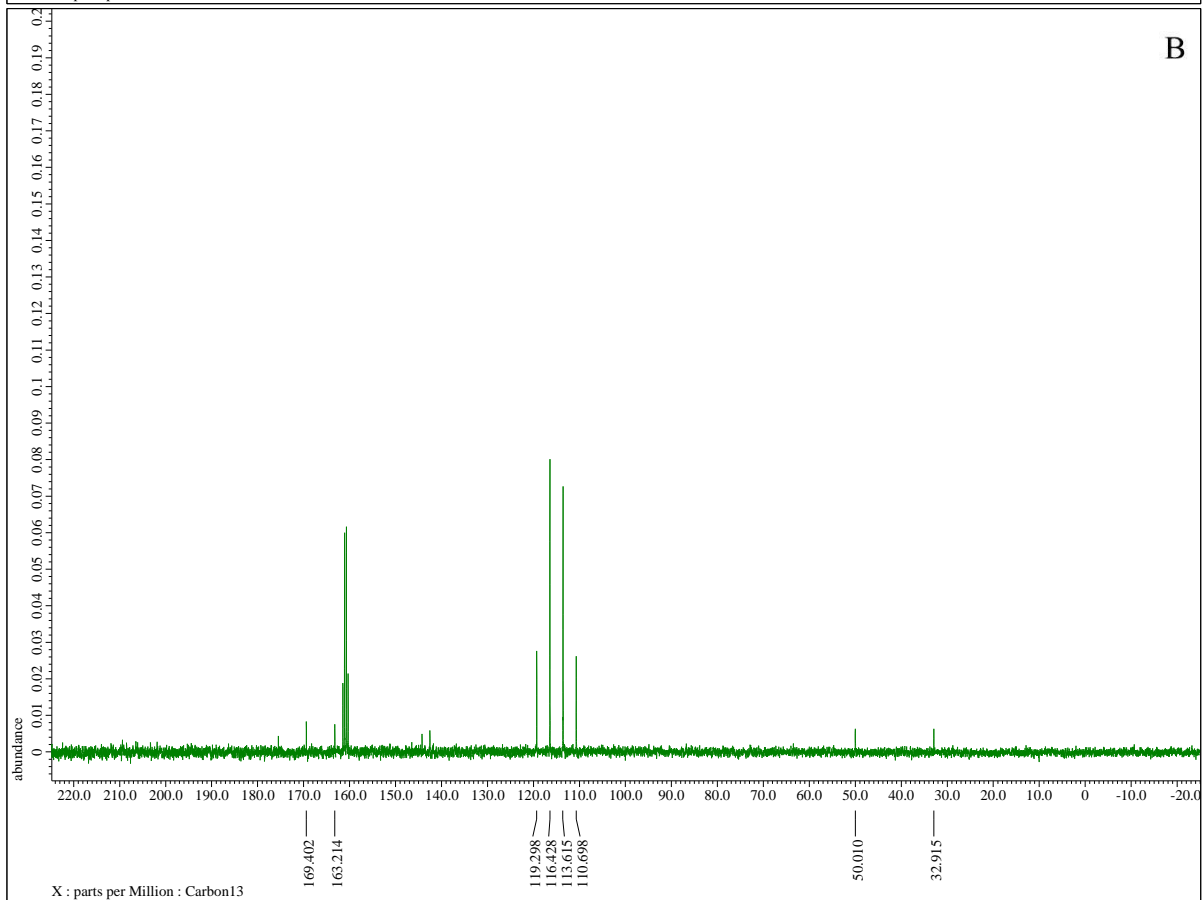

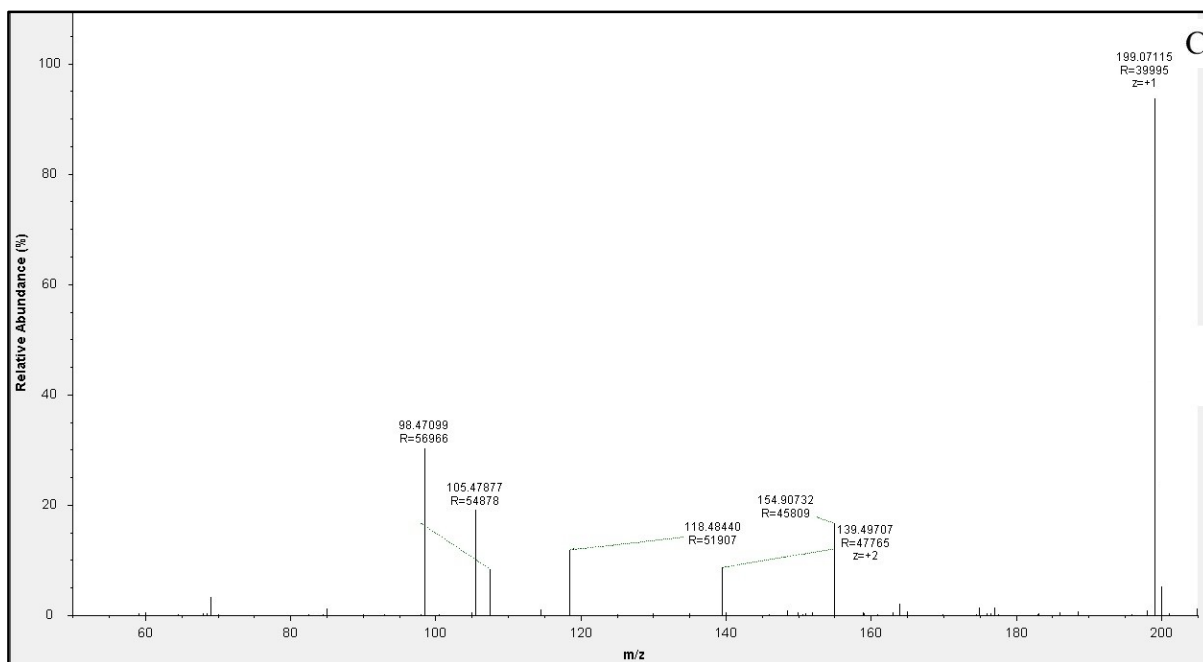

**Figure S9:**  $^1\text{H}$ -NMR spectra *rac*-2-amino-3-(5-hydroxy-4-oxo-4H-pyran-2-yl)propanoic acid (**10**) at 400 MHz in  $\text{D}_2\text{O}/\text{CF}_3\text{CO}_2\text{D}$  and (B)  $^{13}\text{C}$ -NMR spectra of *rac*-2-amino-3-(5-hydroxy-4-oxo-4H-pyran-2-yl)propanoic acid (**10**) at 100 MHz in  $\text{D}_2\text{O}/\text{CF}_3\text{CO}_2\text{D}$  and (C) HRMS of *rac*-2-amino-3-(5-hydroxy-4-oxo-4H-pyran-2-yl)propanoic acid (**10**).

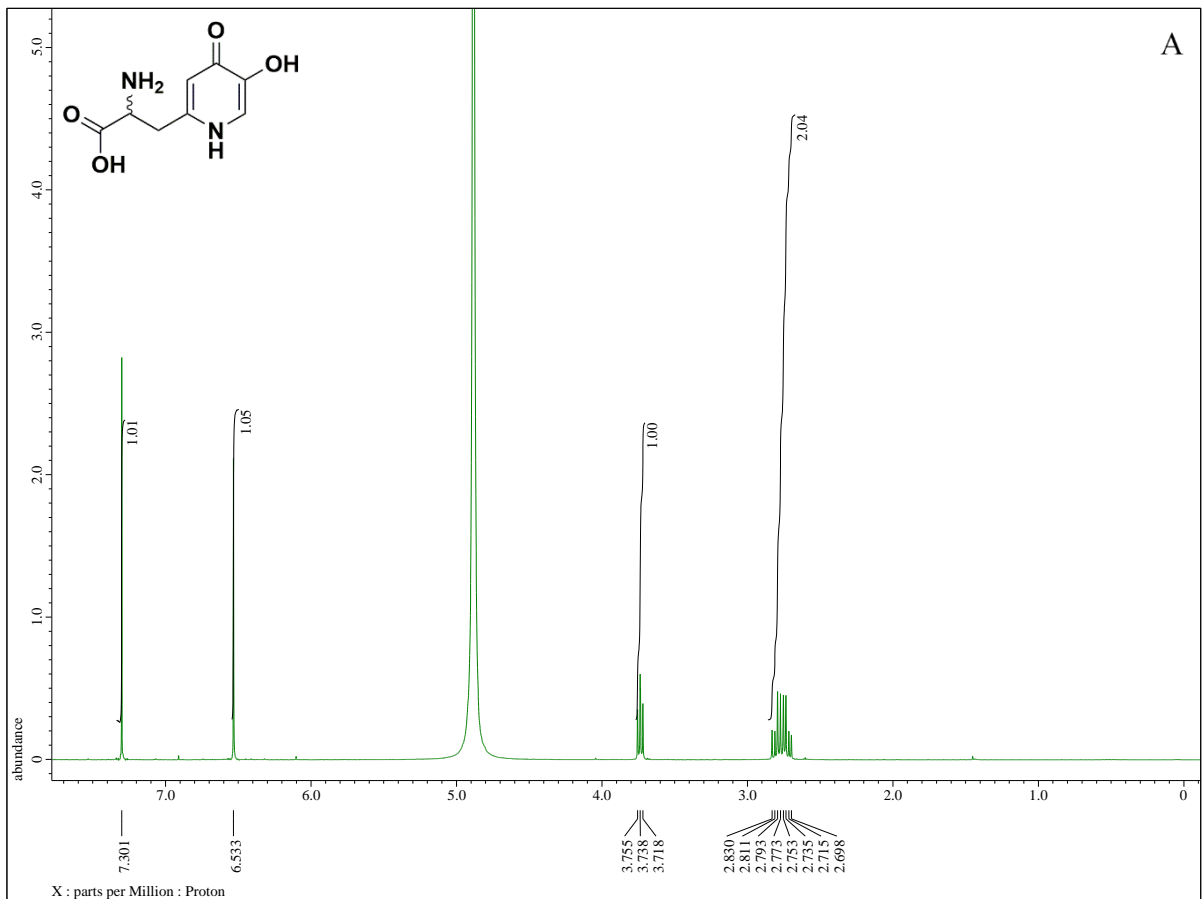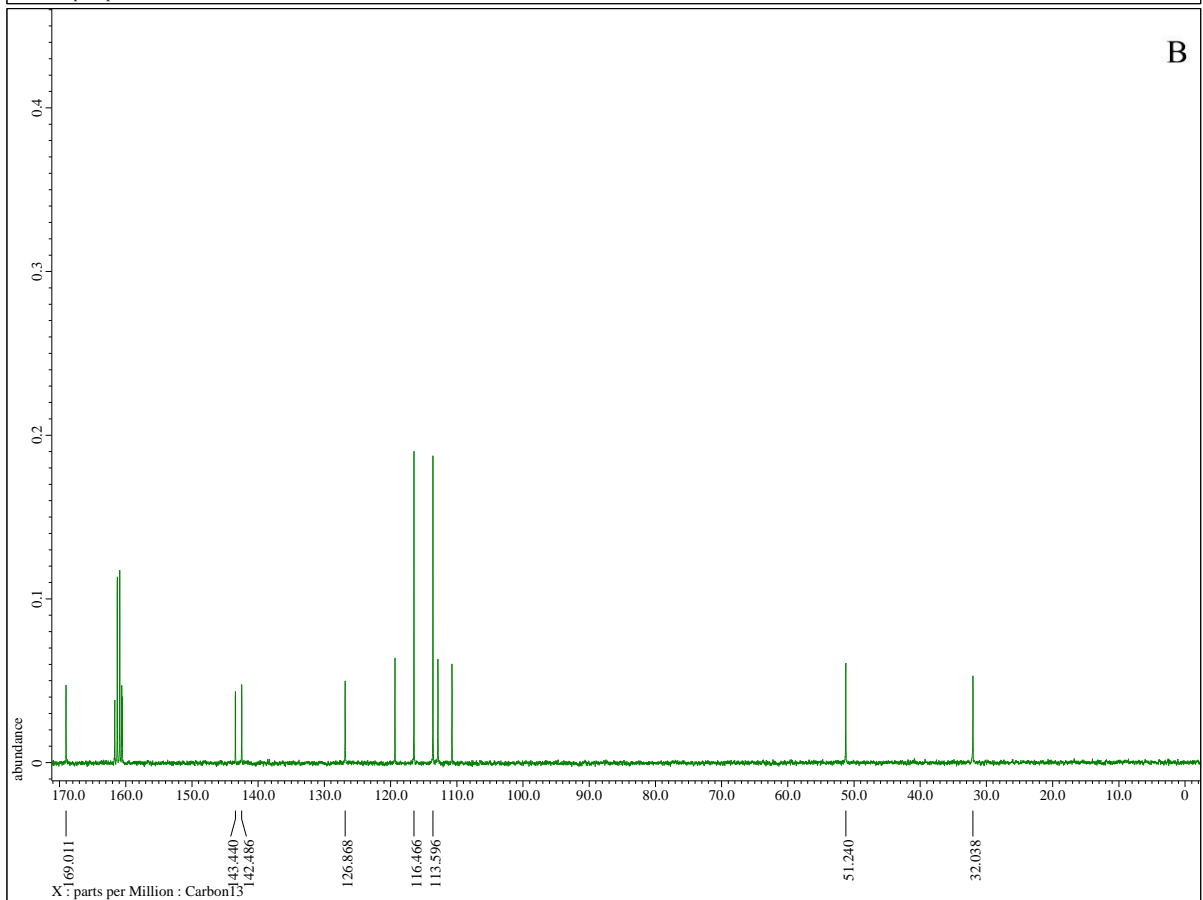



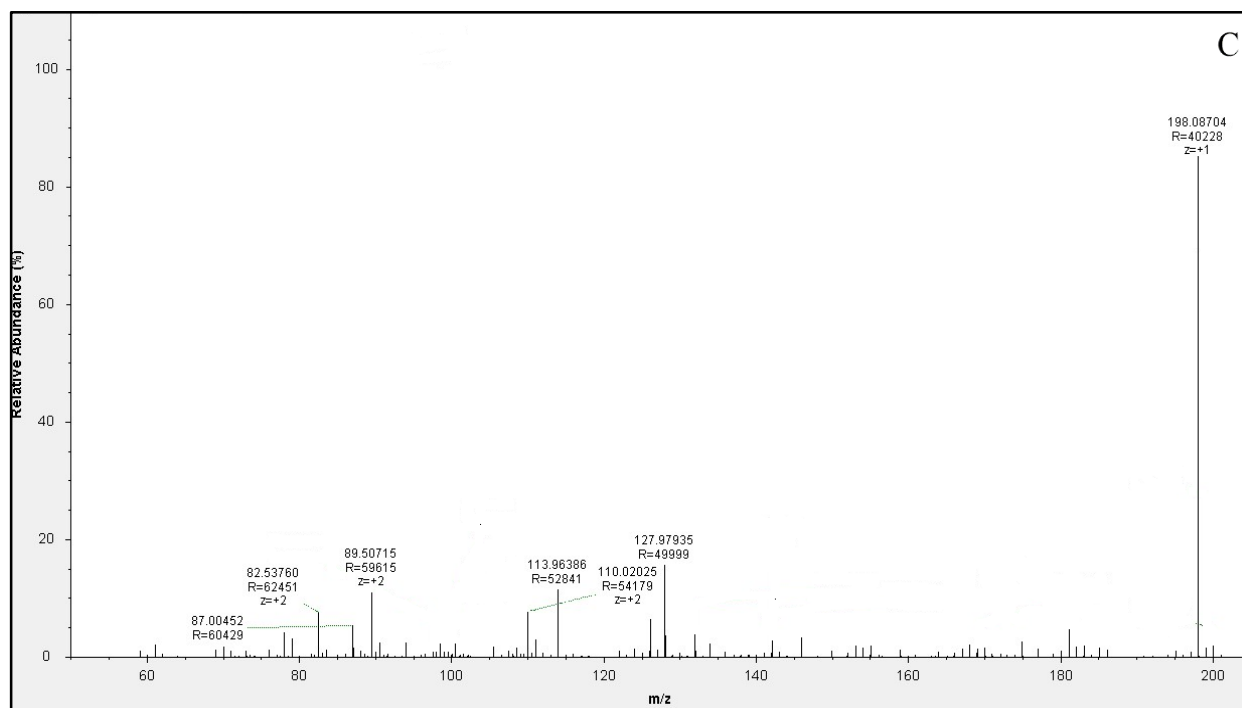

**Figure S10:**  $^1\text{H}$ -NMR spectra *rac*-2-amino-3-(5-hydroxy-4-oxo-1,4-dihydropyridin-2-yl)propanoic acid (11) at 400 MHz in  $\text{D}_2\text{O}/\text{CF}_3\text{CO}_2\text{D}$  and (B)  $^{13}\text{C}$ -NMR spectra of *rac*-2-amino-3-(5-hydroxy-4-oxo-1,4-dihydropyridin-2-yl)propanoic acid (11) at 100 MHz in  $\text{D}_2\text{O}/\text{CF}_3\text{CO}_2\text{D}$  and (C) HRMS of *rac*-2-amino-3-(5-hydroxy-4-oxo-1,4-dihydropyridin-2-yl)propanoic acid (11)

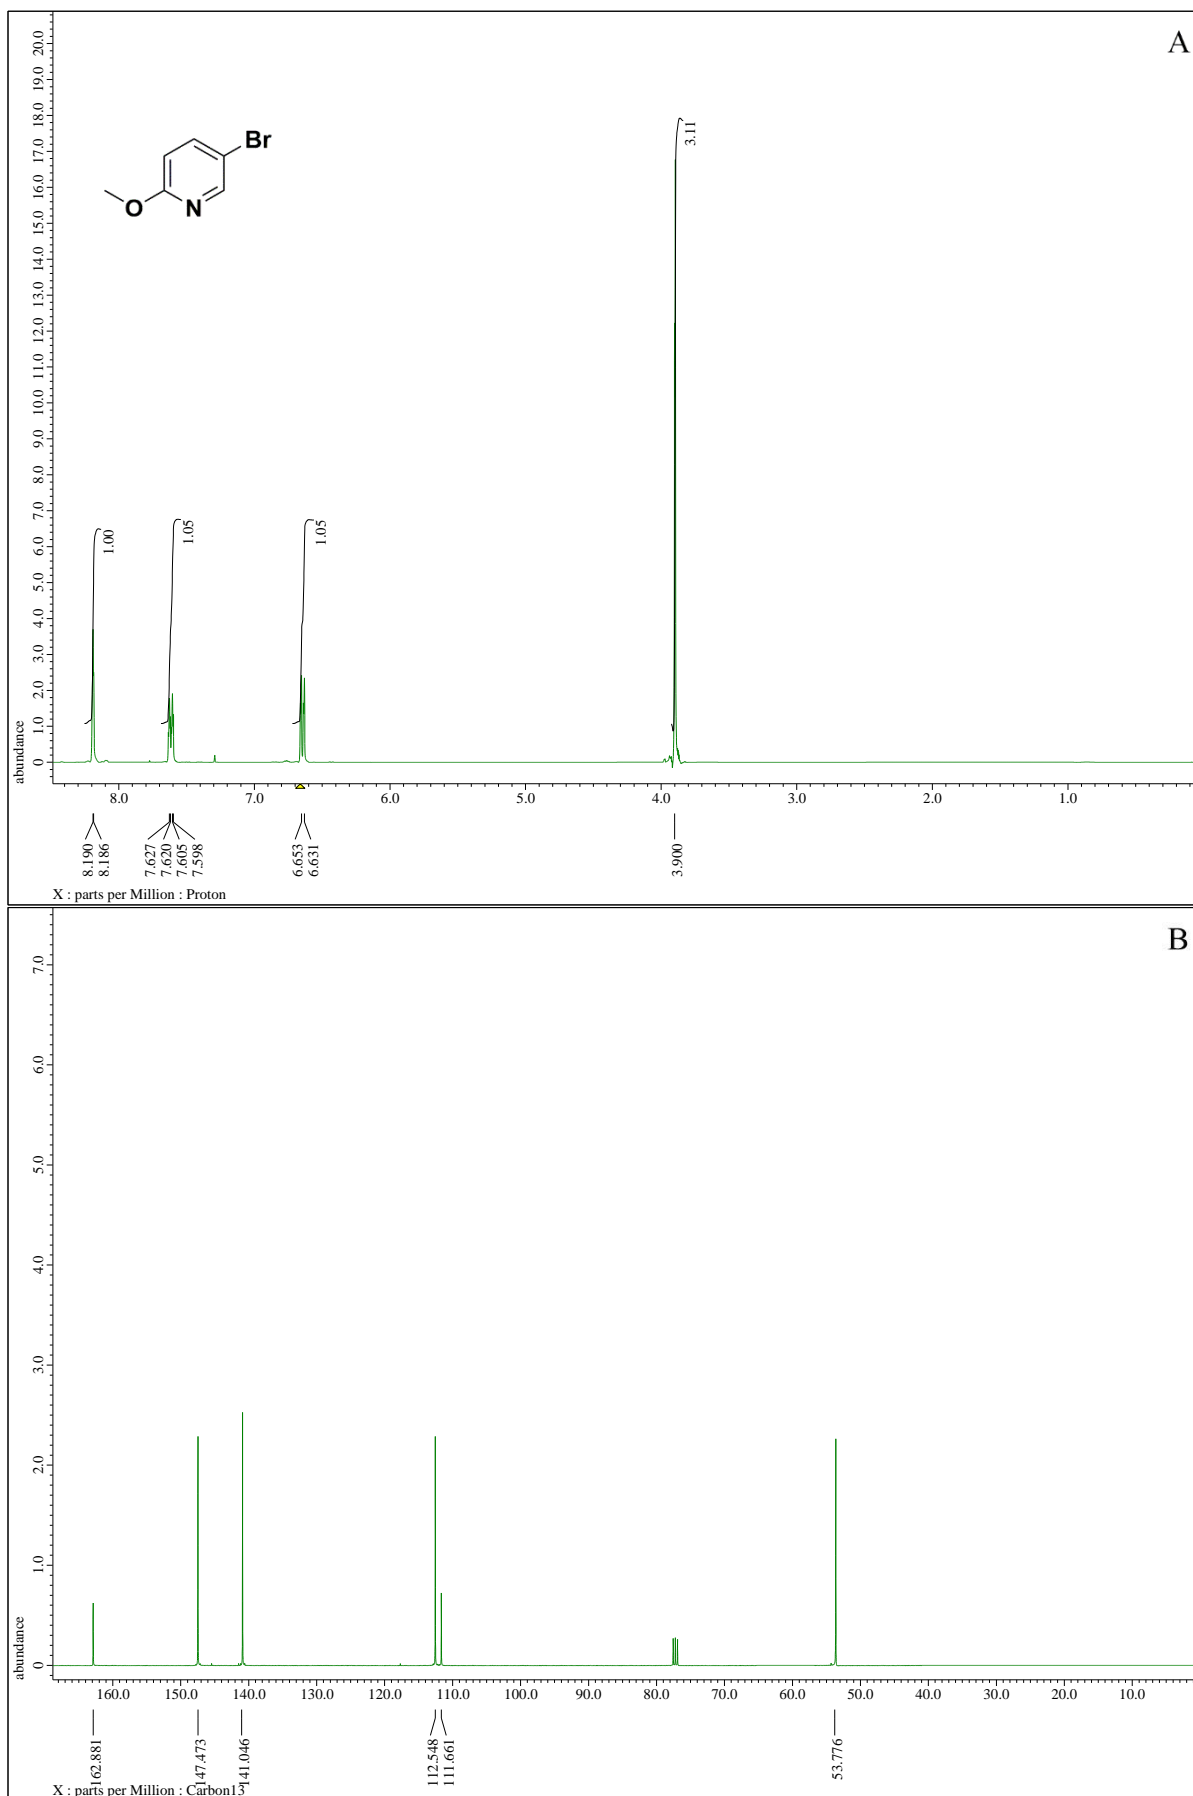

**Figure S11: (A) <sup>1</sup>H-NMR spectra of 5-bromo-2-methoxypyridine (12) at 400 MHz in CDCl<sub>3</sub>, (B) <sup>13</sup>C-NMR spectra of 5-bromo-2-methoxypyridine (12) at 100 MHz in CDCl<sub>3</sub>.**

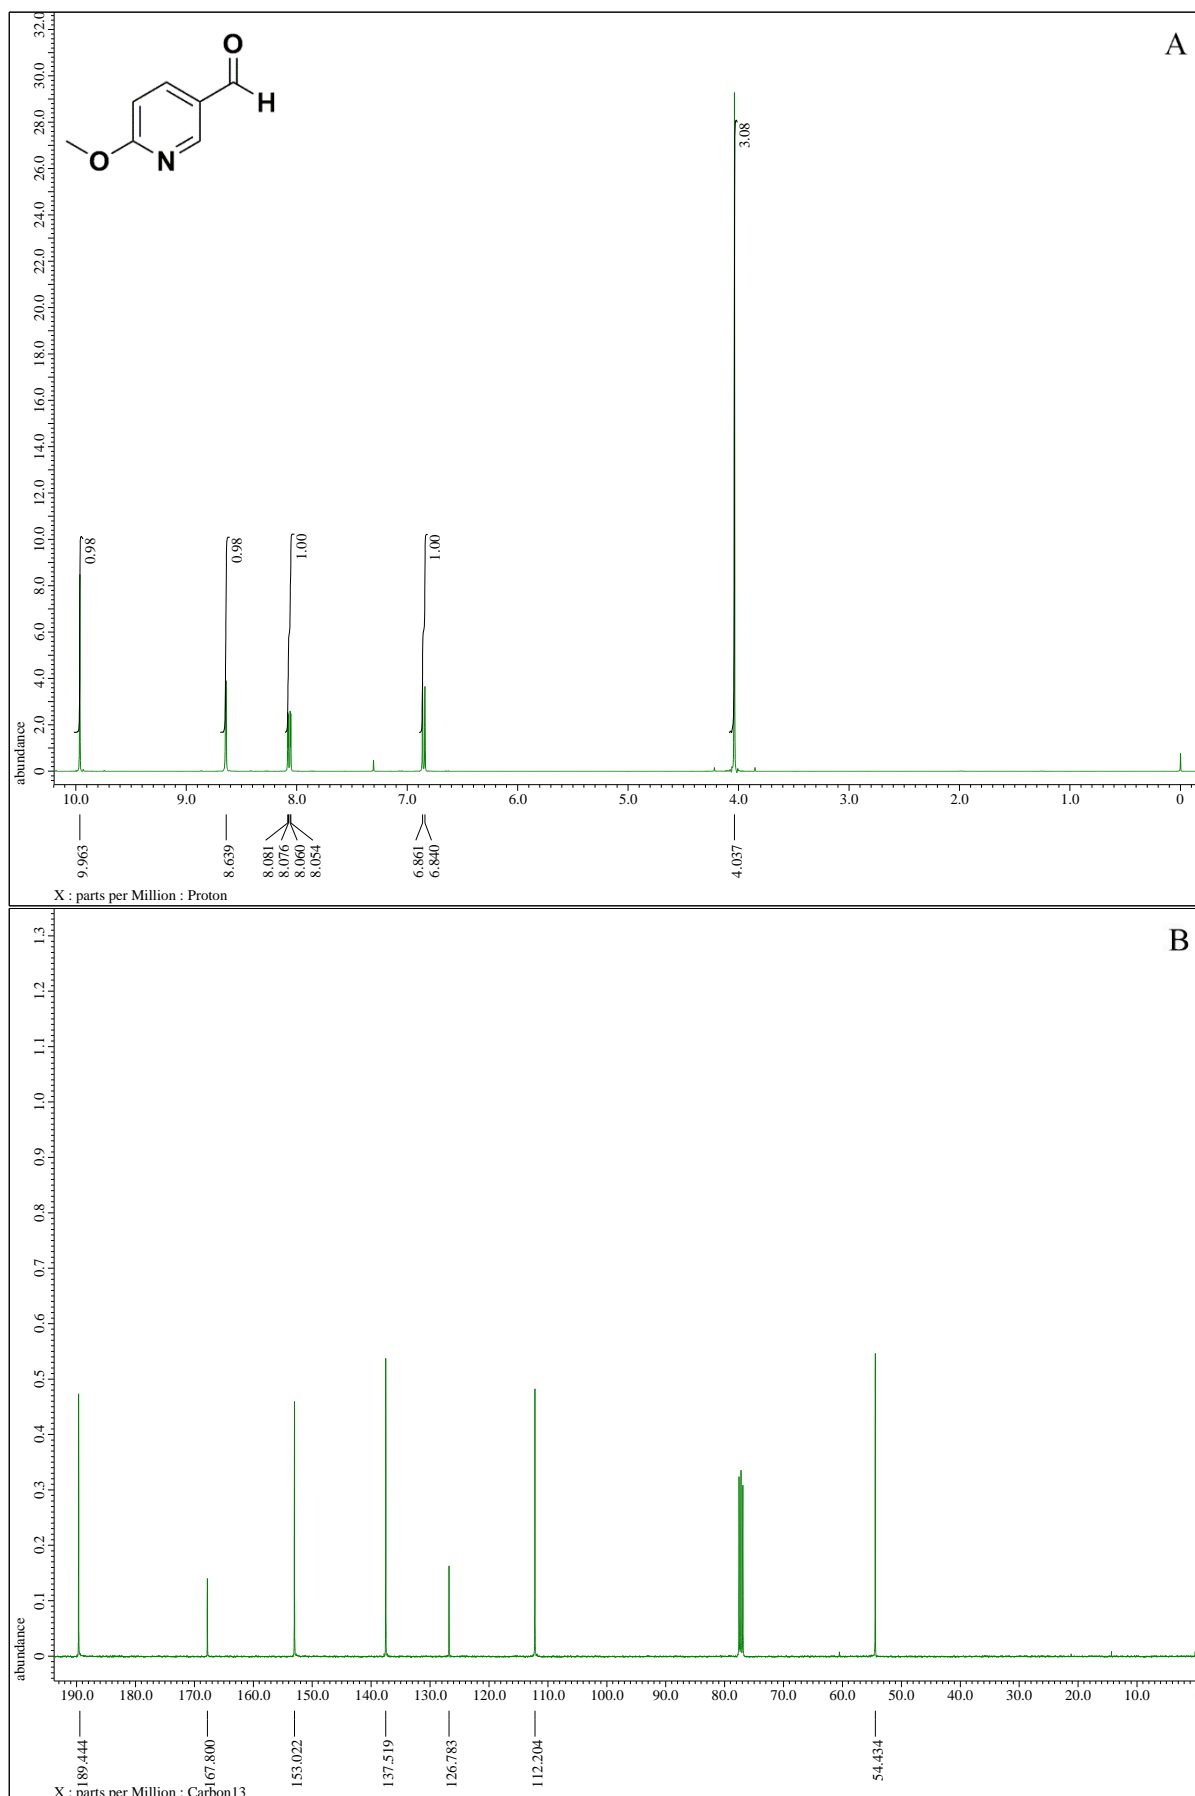

**Figure S12:** (A) <sup>1</sup>H-NMR spectra of 6-methoxy-pyridine-3-carbaldehyde (13) at 400 MHz in CDCl<sub>3</sub>, (B) <sup>13</sup>C-NMR spectra of 6-methoxy-pyridine-3-carbaldehyde (13) at 100 MHz in CDCl<sub>3</sub>.

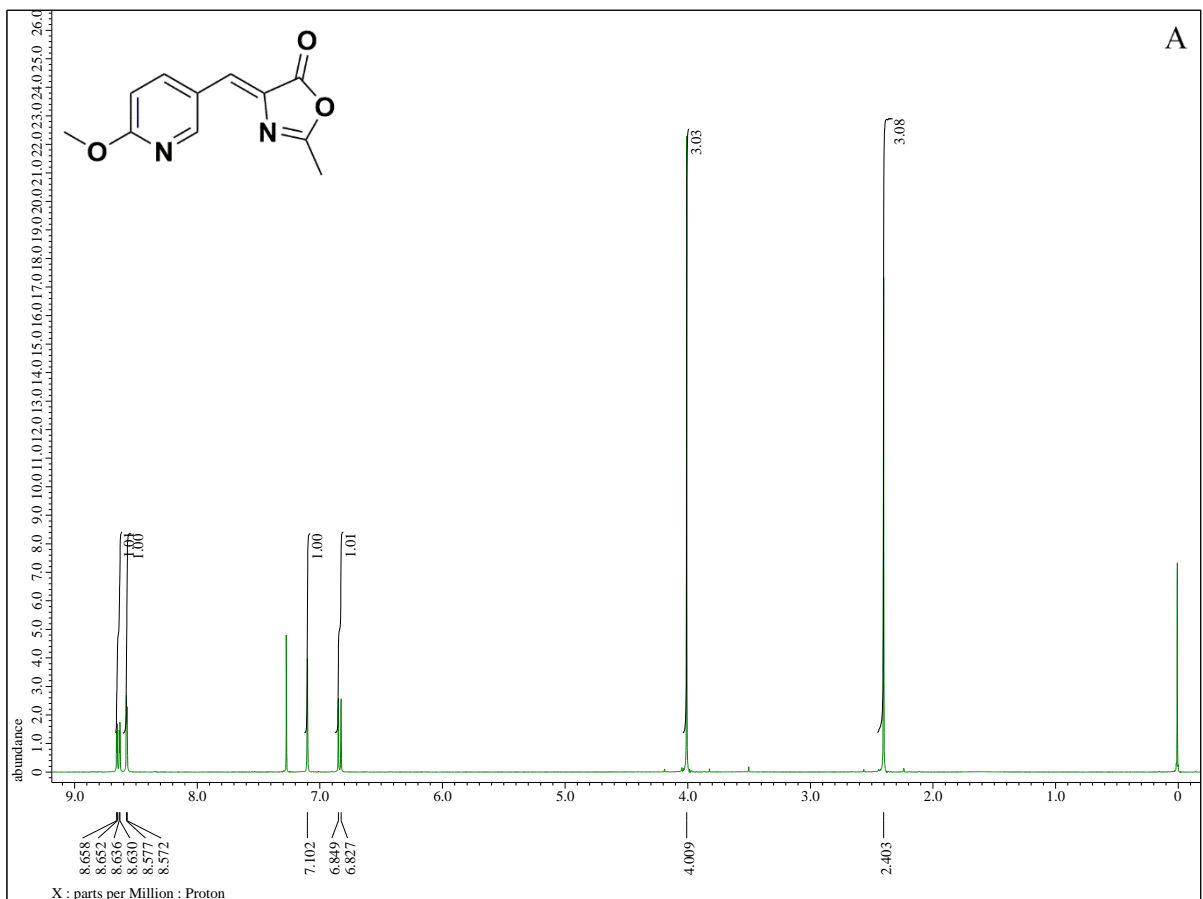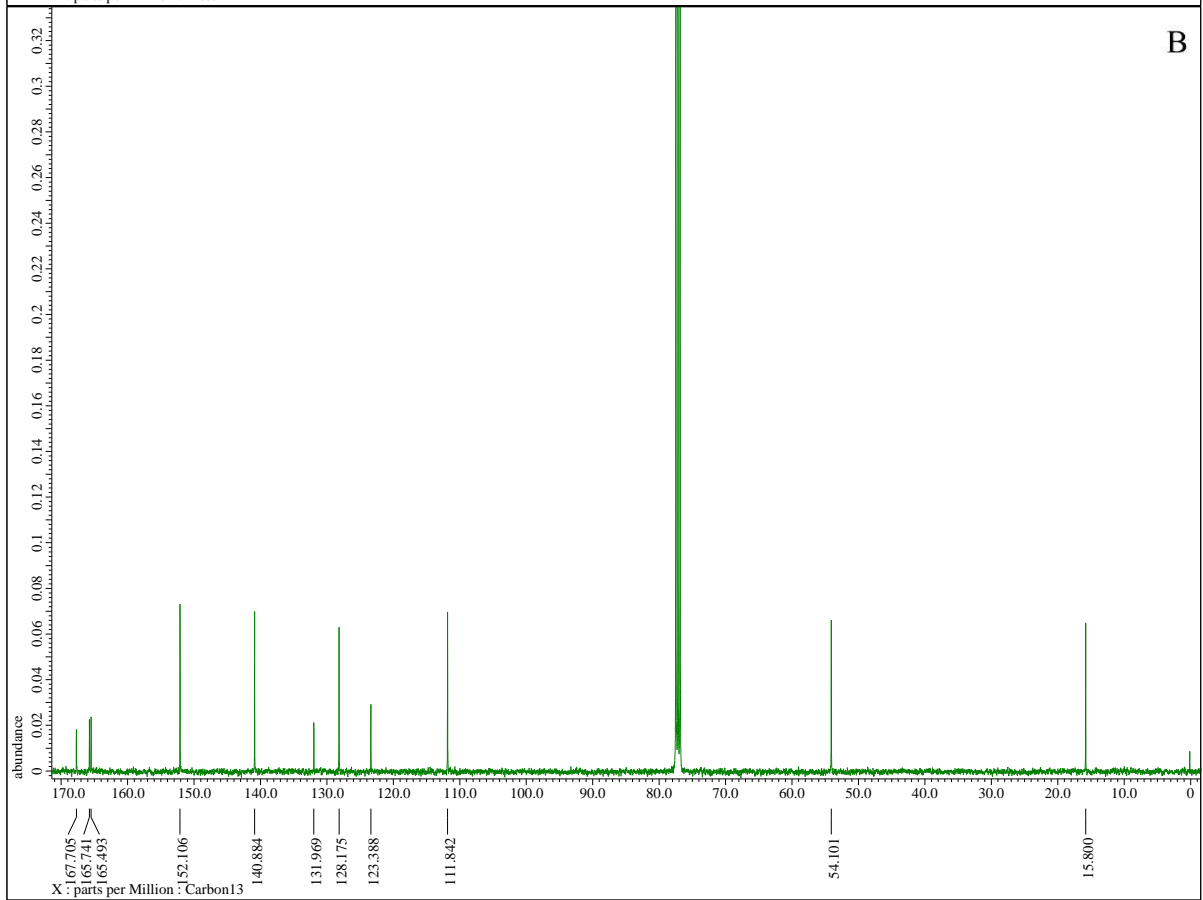

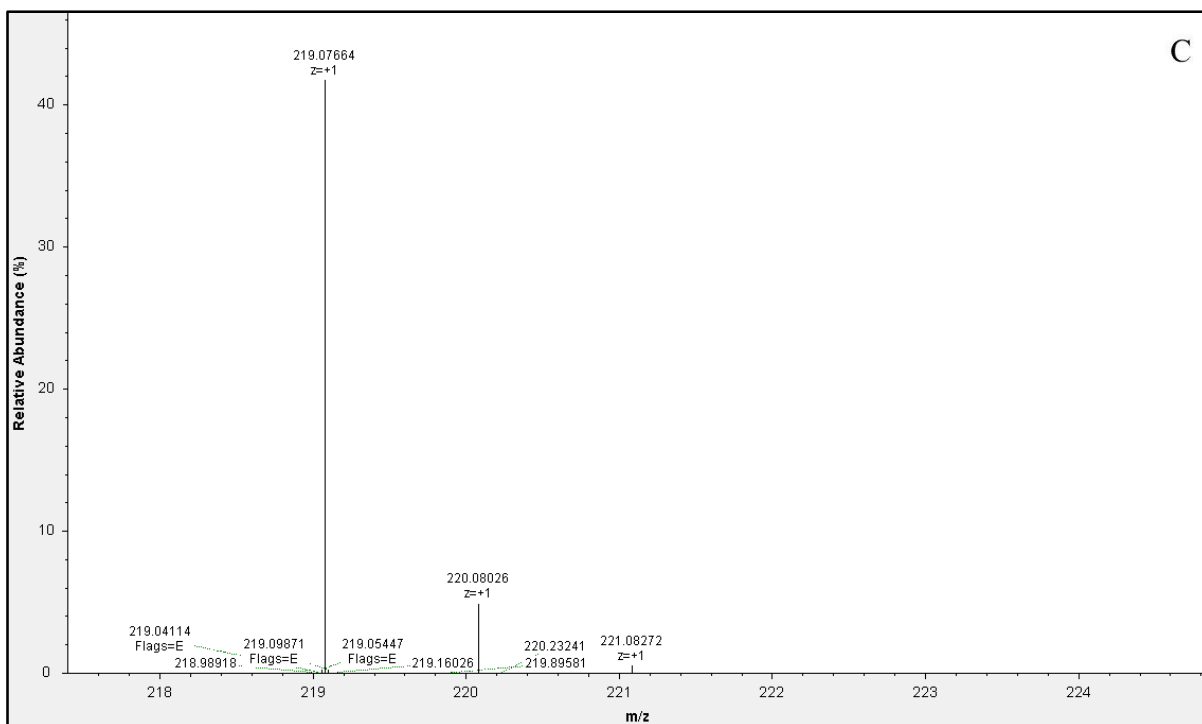

Figure S13:  $^1\text{H}$ -NMR spectra (4Z)-4-[(6-methoxypyridin-3-yl)methylidene]-2-methyl-4,5-dihydro-1,3-oxazol-5-one (14) at 400 MHz in  $\text{CDCl}_3$  and (B)  $^{13}\text{C}$ -NMR spectra of (4Z)-4-[(6-methoxypyridin-3-yl)methylidene]-2-methyl-4,5-dihydro-1,3-oxazol-5-one (14) at 100 MHz in  $\text{CDCl}_3$  and (C) HRMS of (4Z)-4-[(6-methoxypyridin-3-yl)methylidene]-2-methyl-4,5-dihydro-1,3-oxazol-5-one (14).

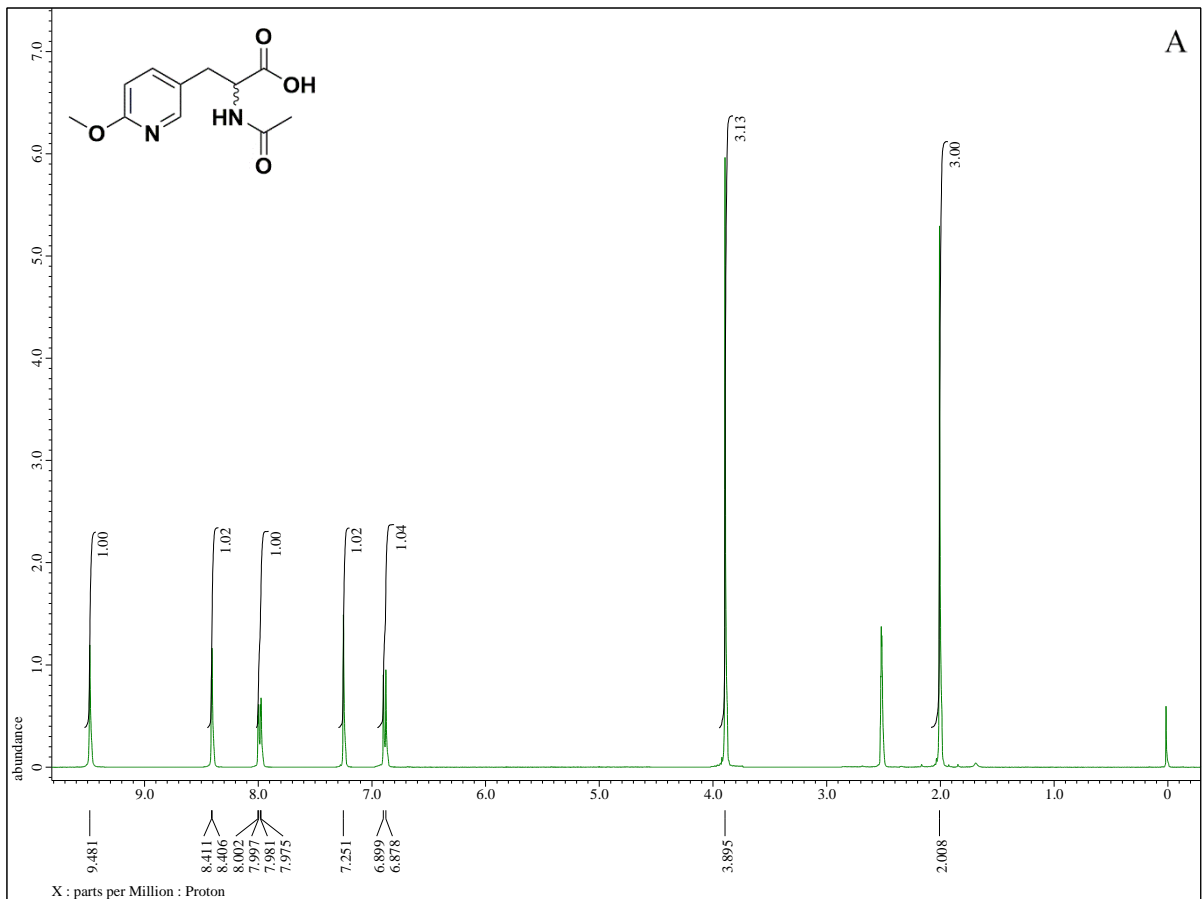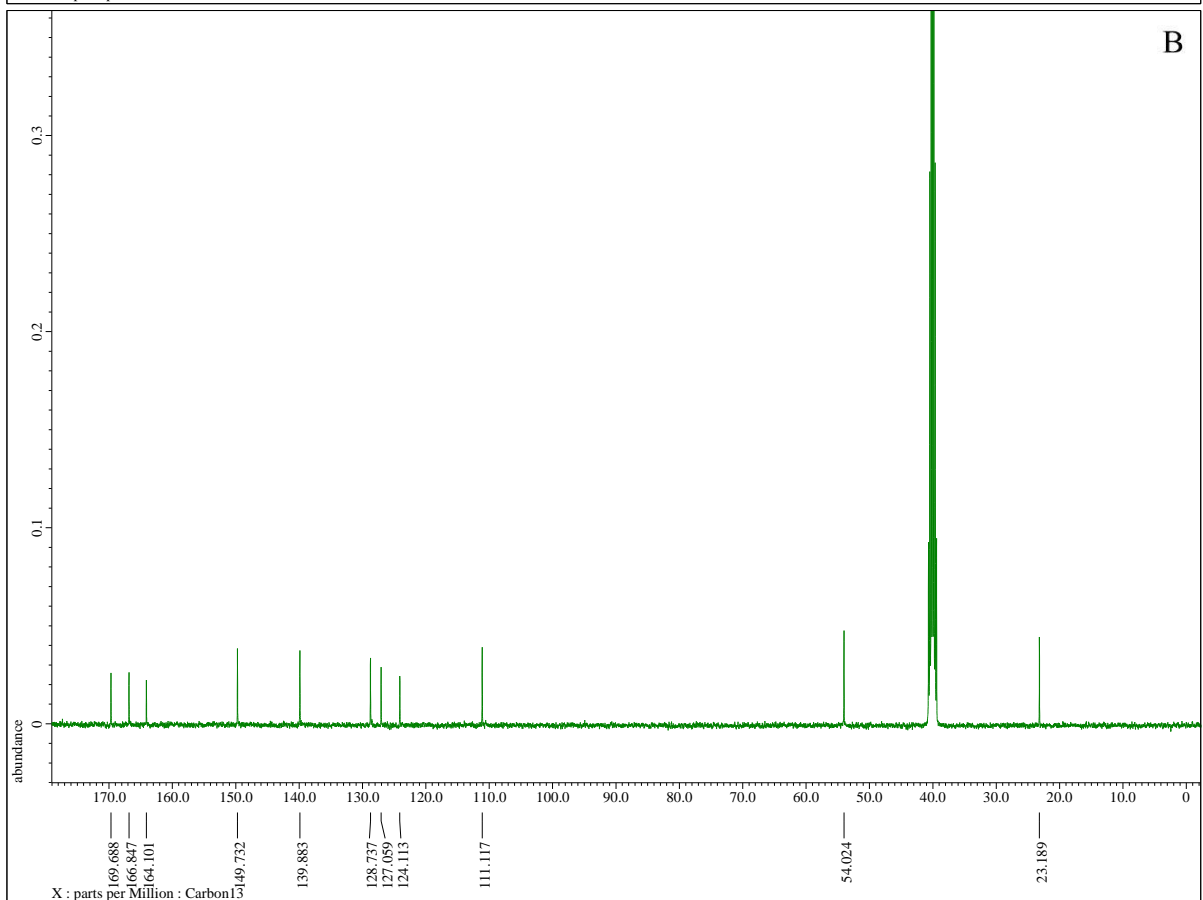

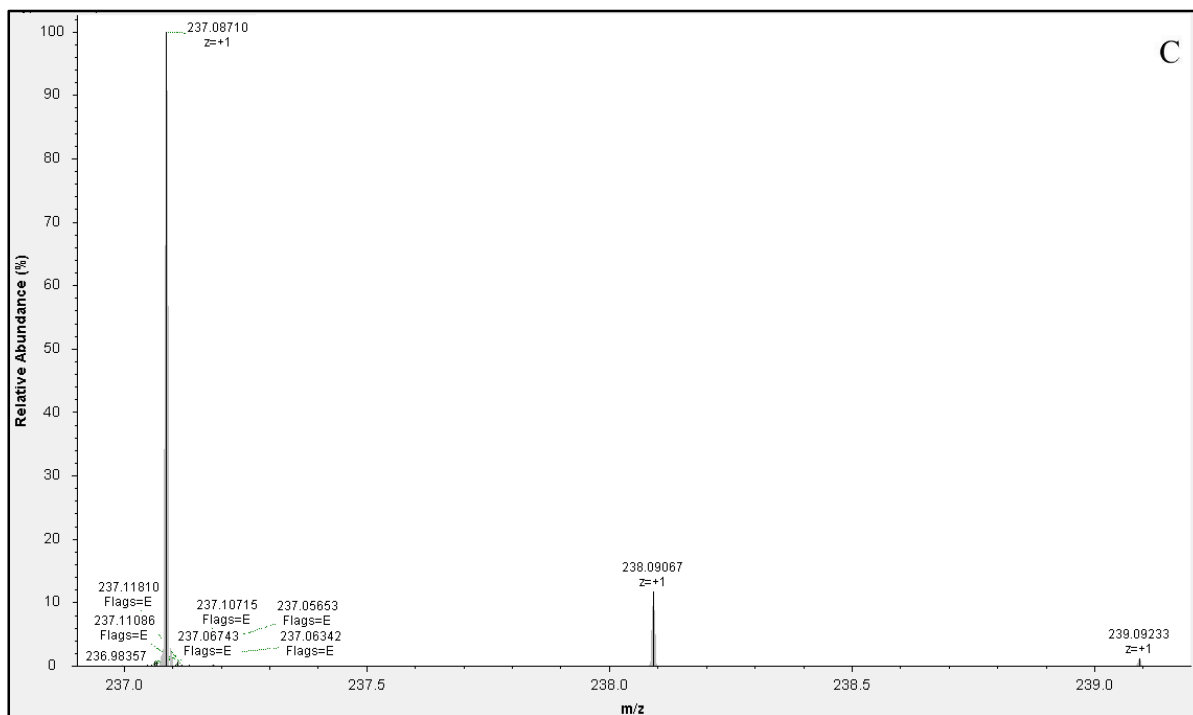

**Figure S14:**  $^1\text{H}$ -NMR spectra of (2Z)-2-acetamido-3-(6-methoxypyridin-3-yl)prop-2-enoic acid (15) at 400 MHz in  $\text{CDCl}_3$  and (B)  $^{13}\text{C}$ -NMR spectra of (2Z)-2-acetamido-3-(6-methoxypyridin-3-yl)prop-2-enoic acid (15) at 100 MHz in  $\text{CDCl}_3$  and (C) HRMS of (2Z)-2-acetamido-3-(6-methoxypyridin-3-yl)prop-2-enoic acid (15)

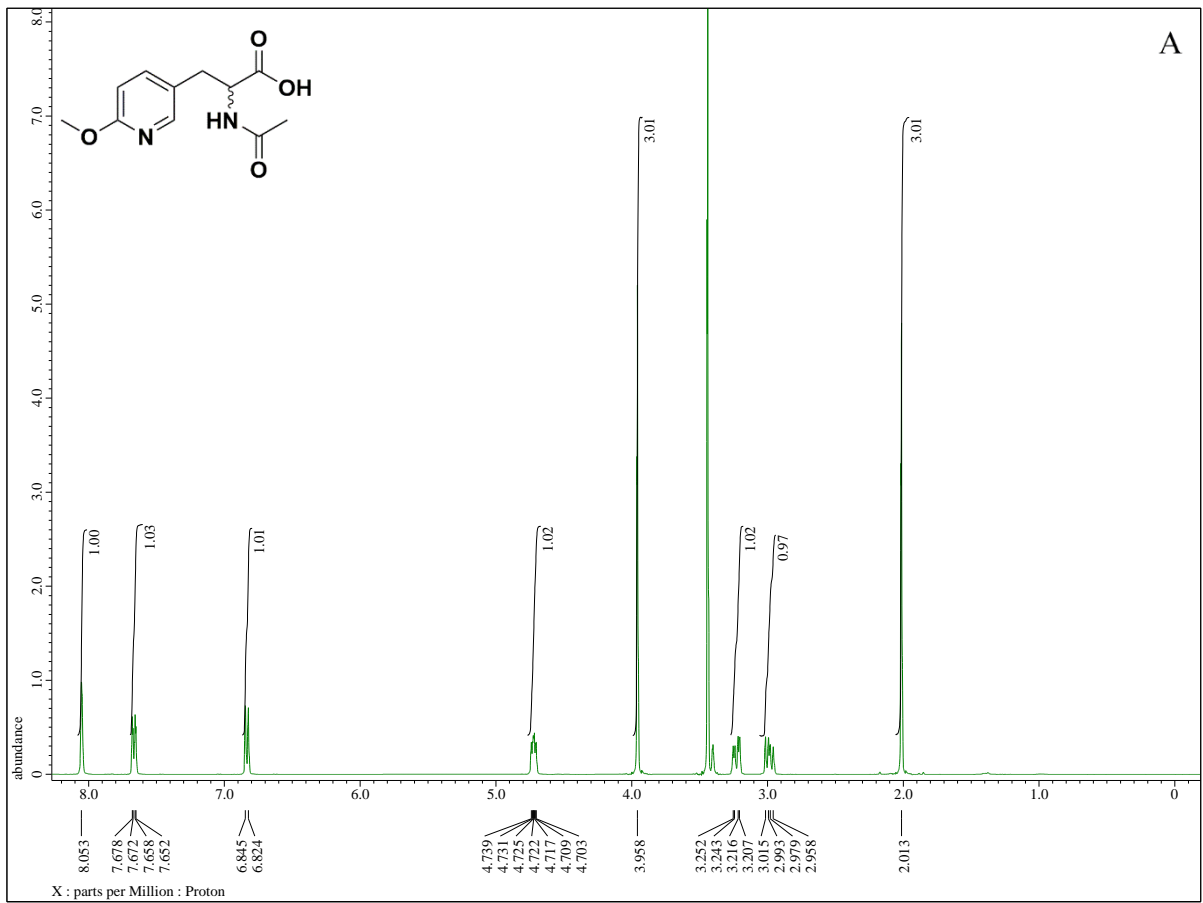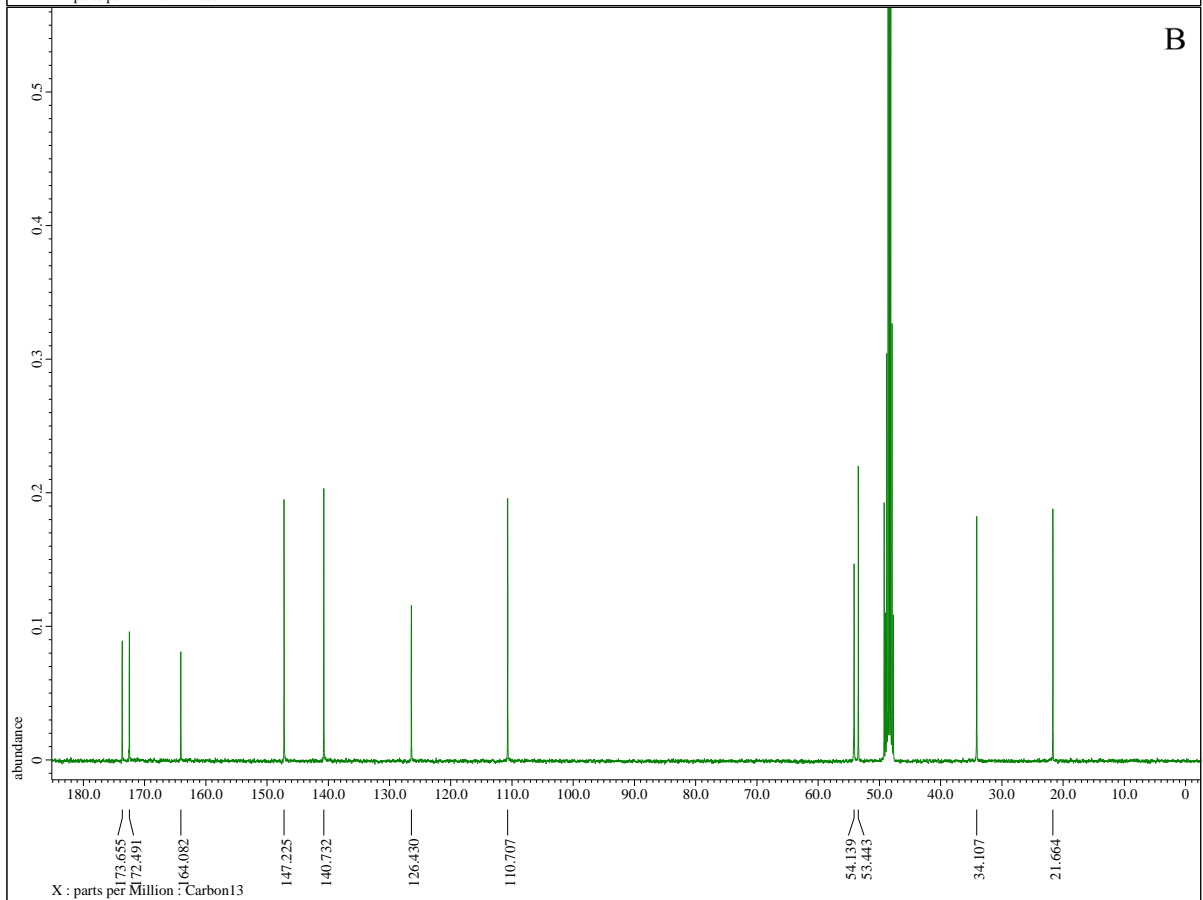



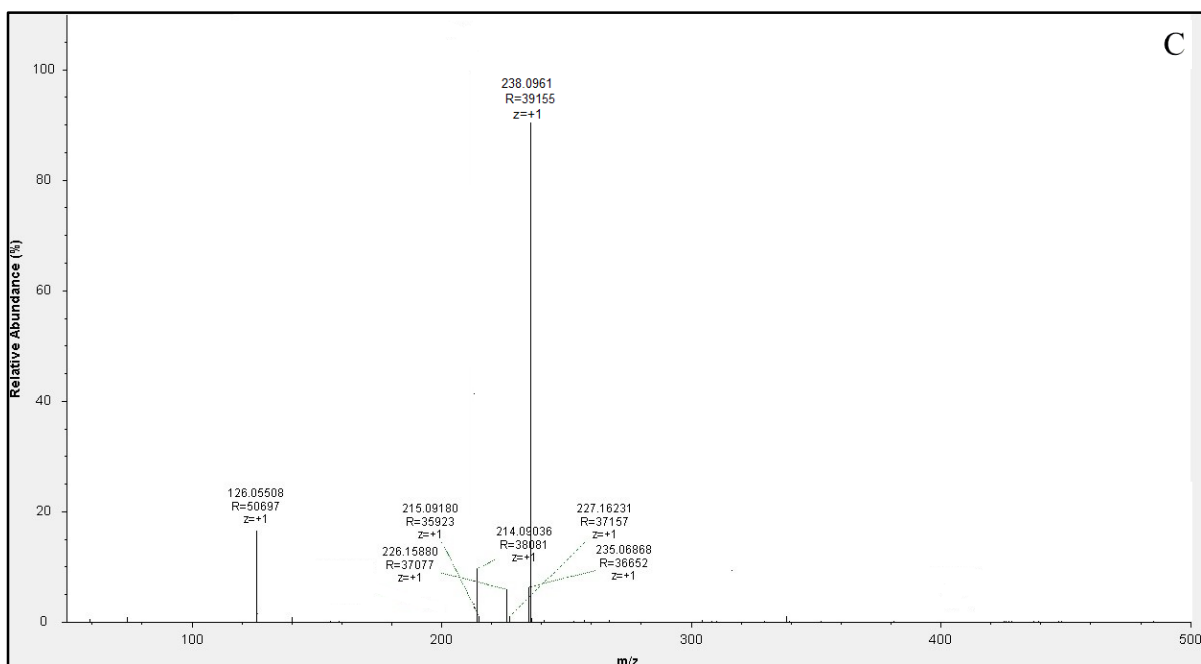

**Figure S15:** <sup>1</sup>H-NMR spectra of *rac*-2-acetamido-3-(6-methoxypyridin-3-yl)propanoic acid (16) at 400 MHz in MeOH-*d*<sub>4</sub> and (B) <sup>13</sup>C-NMR spectra of *rac*-2-acetamido-3-(6-methoxypyridin-3-yl)propanoic acid (16) at 100 MHz in MeOH-*d*<sub>4</sub> and (C) HRMS of *rac*-2-acetamido-3-(6-methoxypyridin-3-yl)propanoic acid (16)

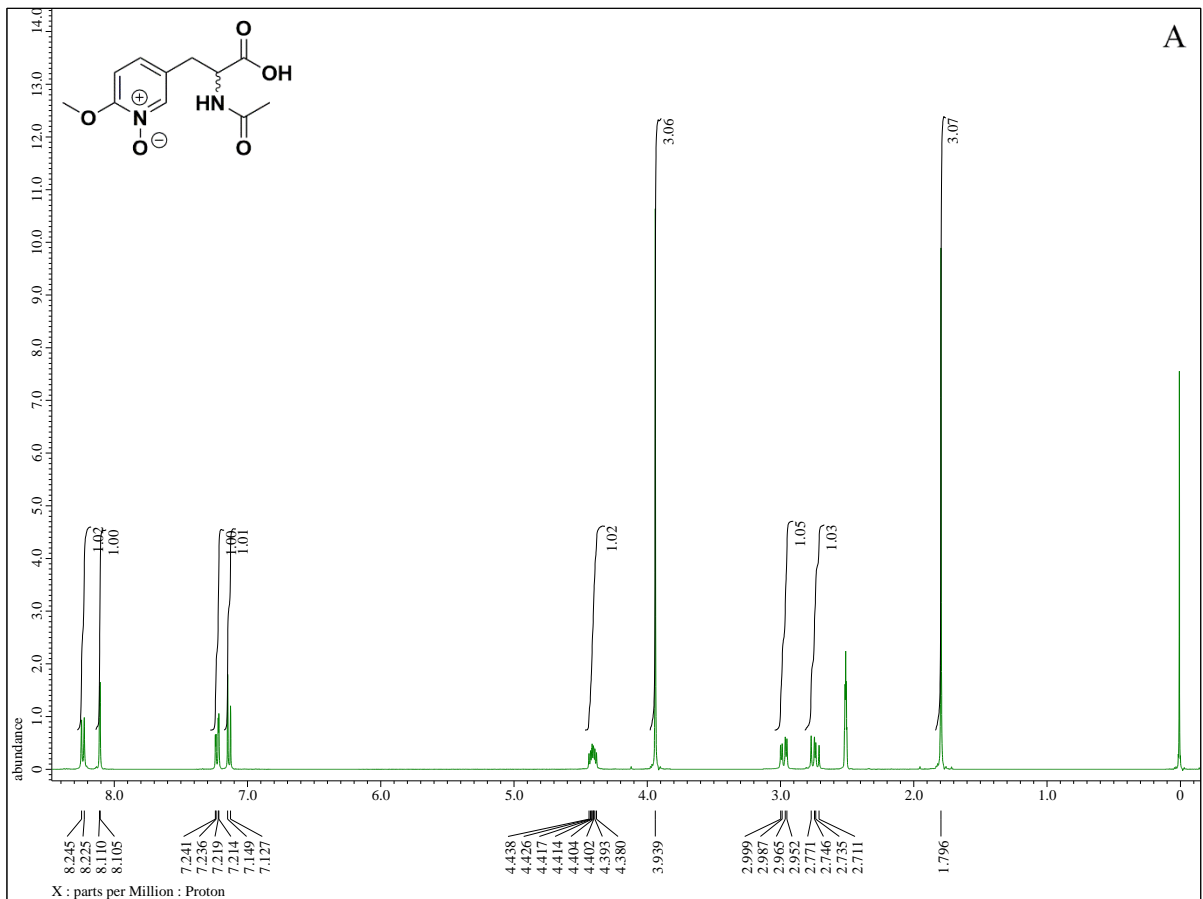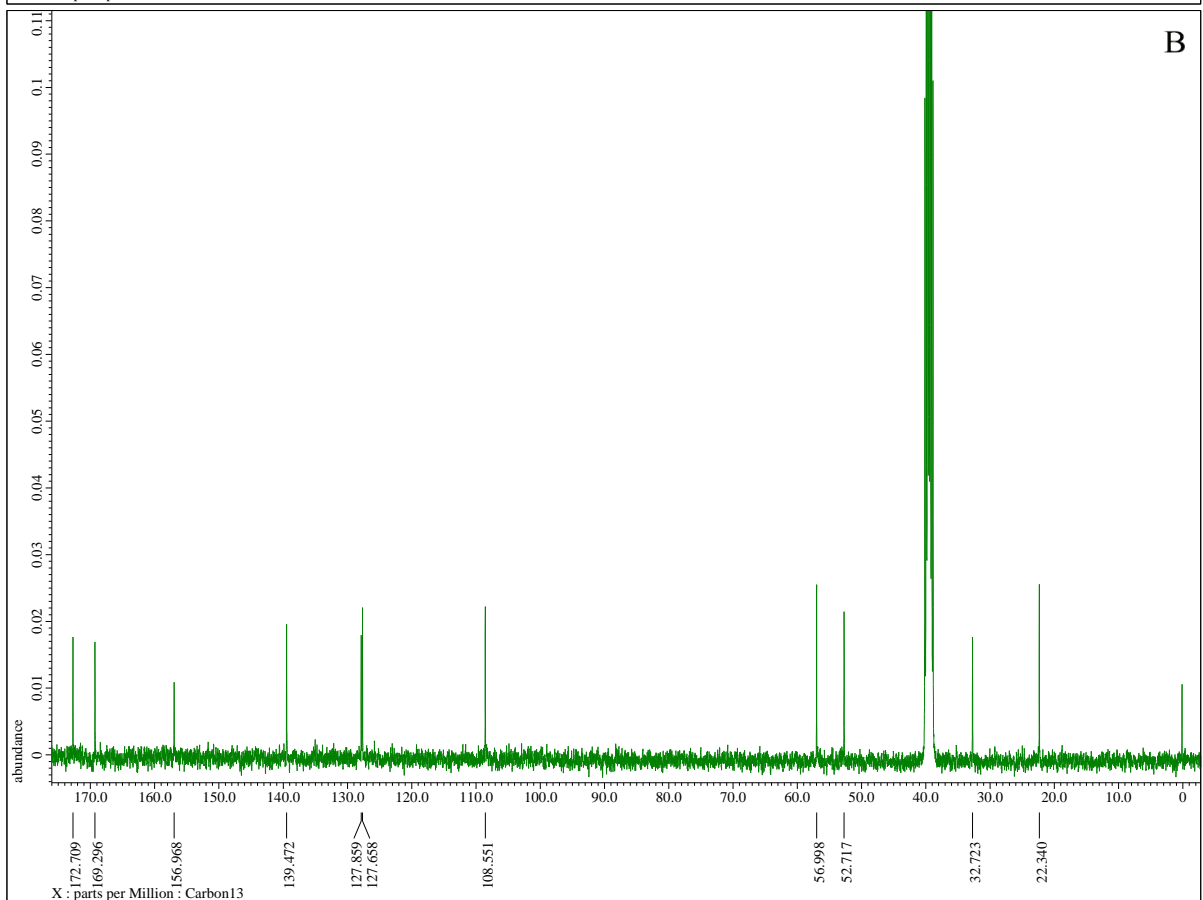

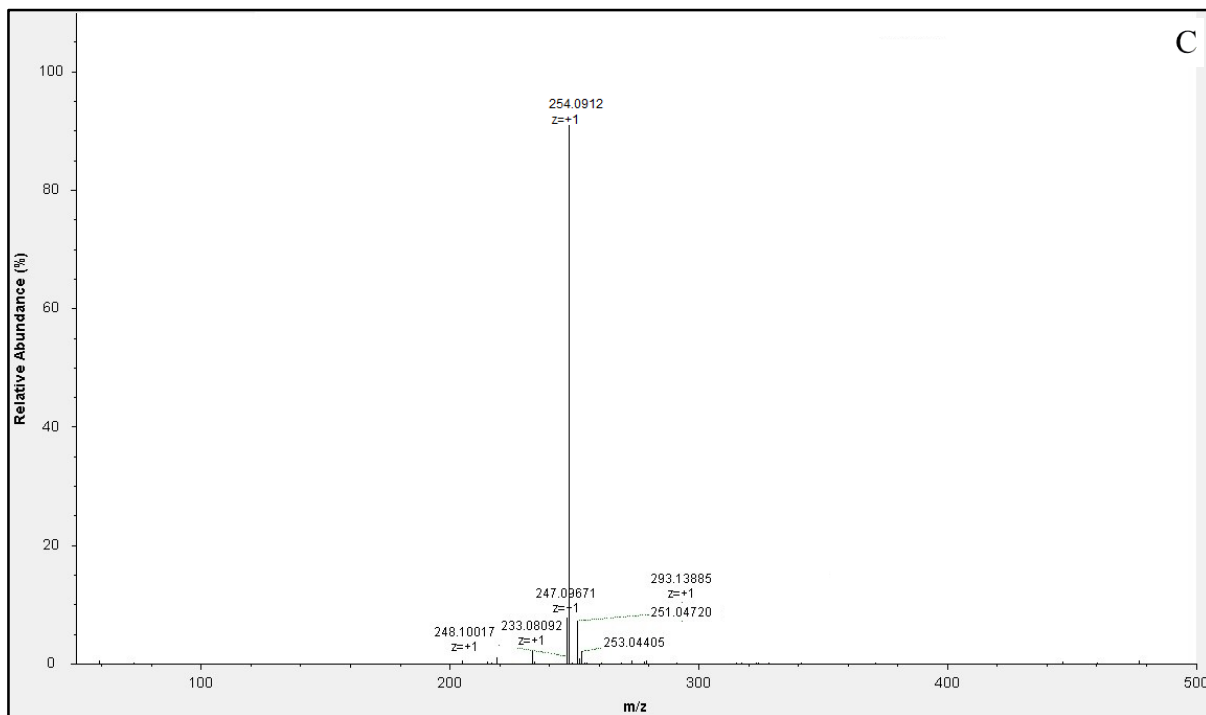

**Figure S16: <sup>1</sup>H-NMR spectra of rac-5-(2-carboxy-2-acetamidoethyl)-2-methoxypyridin-1-ium-1-olate (17) at 400 MHz in DMSO-d<sub>6</sub> and (B) <sup>13</sup>C-NMR spectra of rac-5-(2-carboxy-2-acetamidoethyl)-2-methoxypyridin-1-ium-1-olate (17) at 100 MHz in DMSO-d<sub>6</sub> and (C) HRMS of rac-5-(2-carboxy-2-acetamidoethyl)-2-methoxypyridin-1-ium-1-olate (17)**

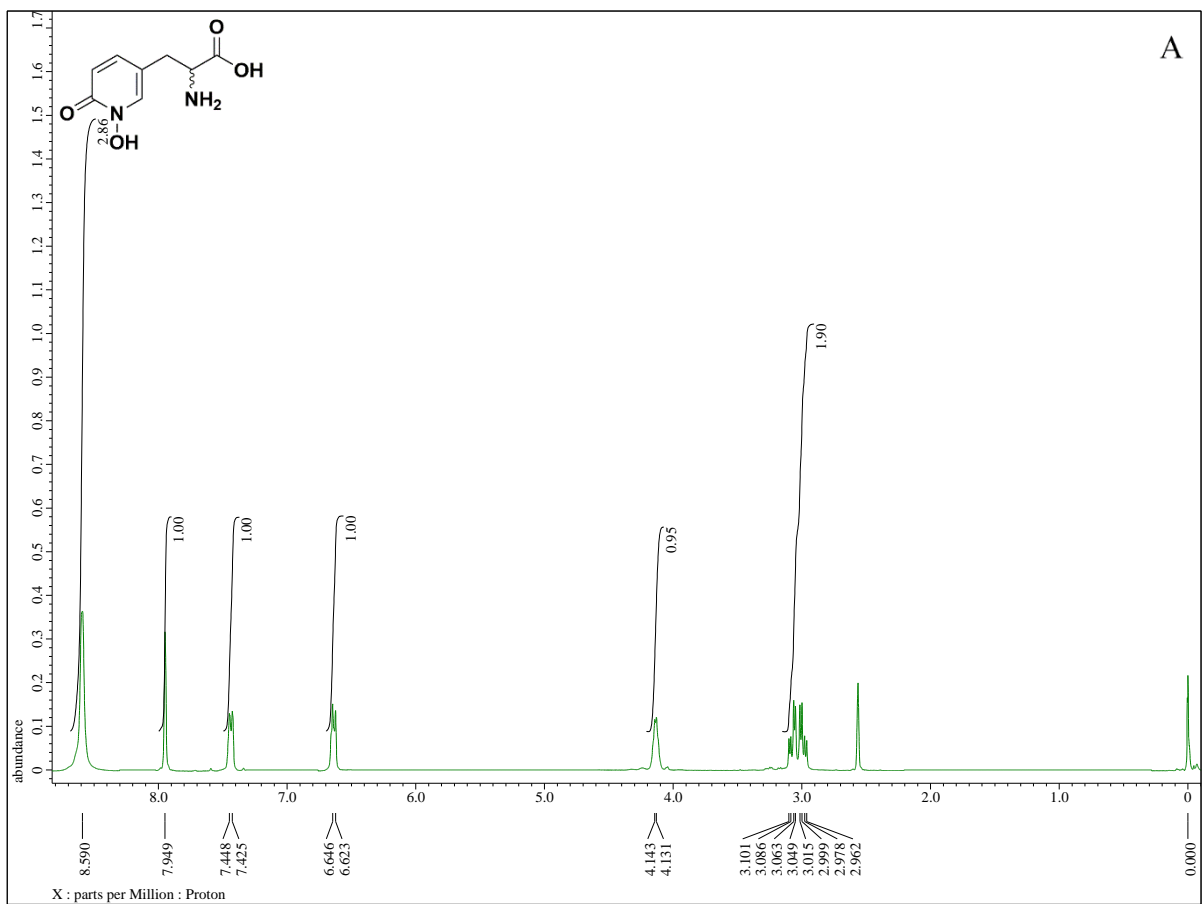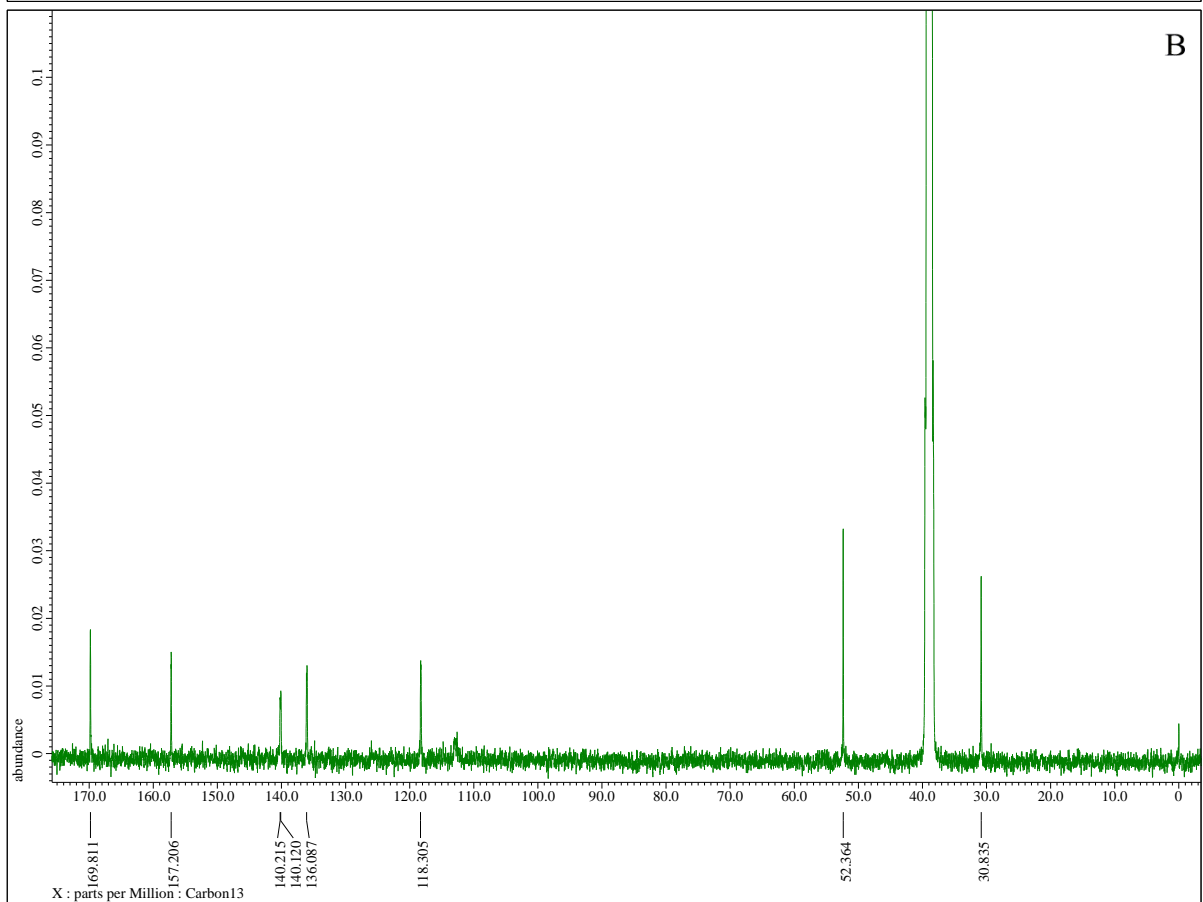

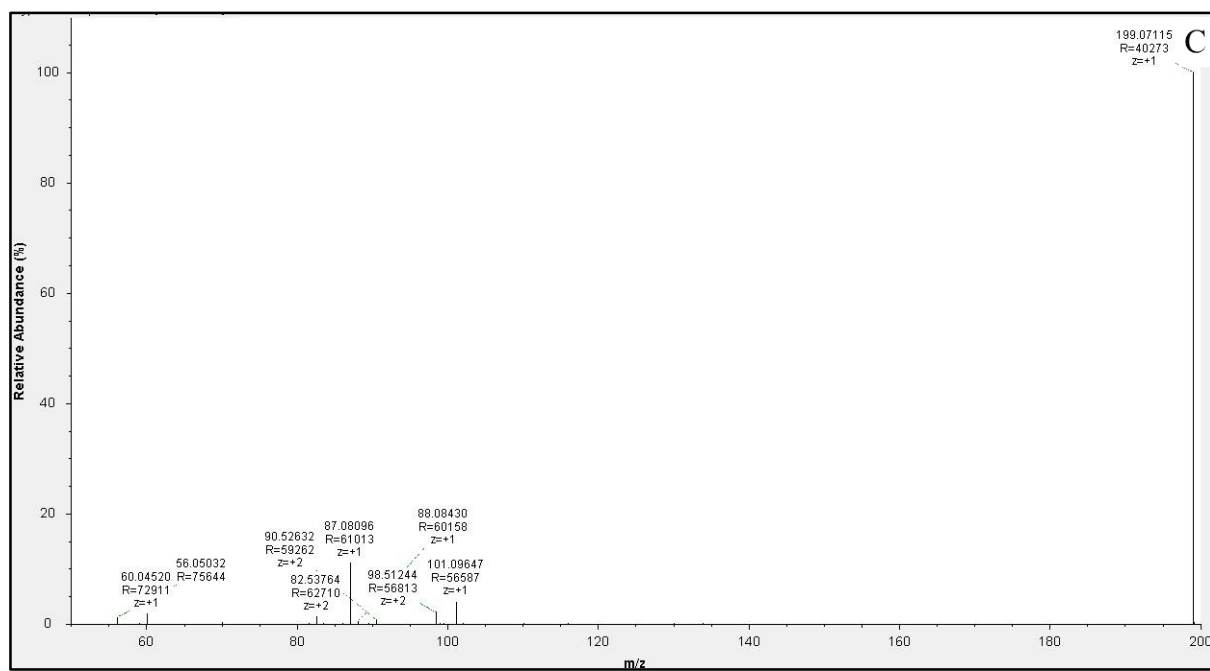

**Figure S17:**  $^1\text{H}$ -NMR spectra of *rac*-2-amino-3-(1-hydroxy-6-oxo-1,6-dihydropyridin-3-yl)propanoic acid (18) at 400 MHz in  $\text{DMSO-}d_6$  and (B)  $^{13}\text{C}$ -NMR spectra of *rac*-2-amino-3-(1-hydroxy-6-oxo-1,6-dihydropyridin-3-yl)propanoic acid (18) at 100 MHz in  $\text{DMSO-}d_6$  and (C) HRMS of *rac*-2-amino-3-(1-hydroxy-6-oxo-1,6-dihydropyridin-3-yl)propanoic acid (18)

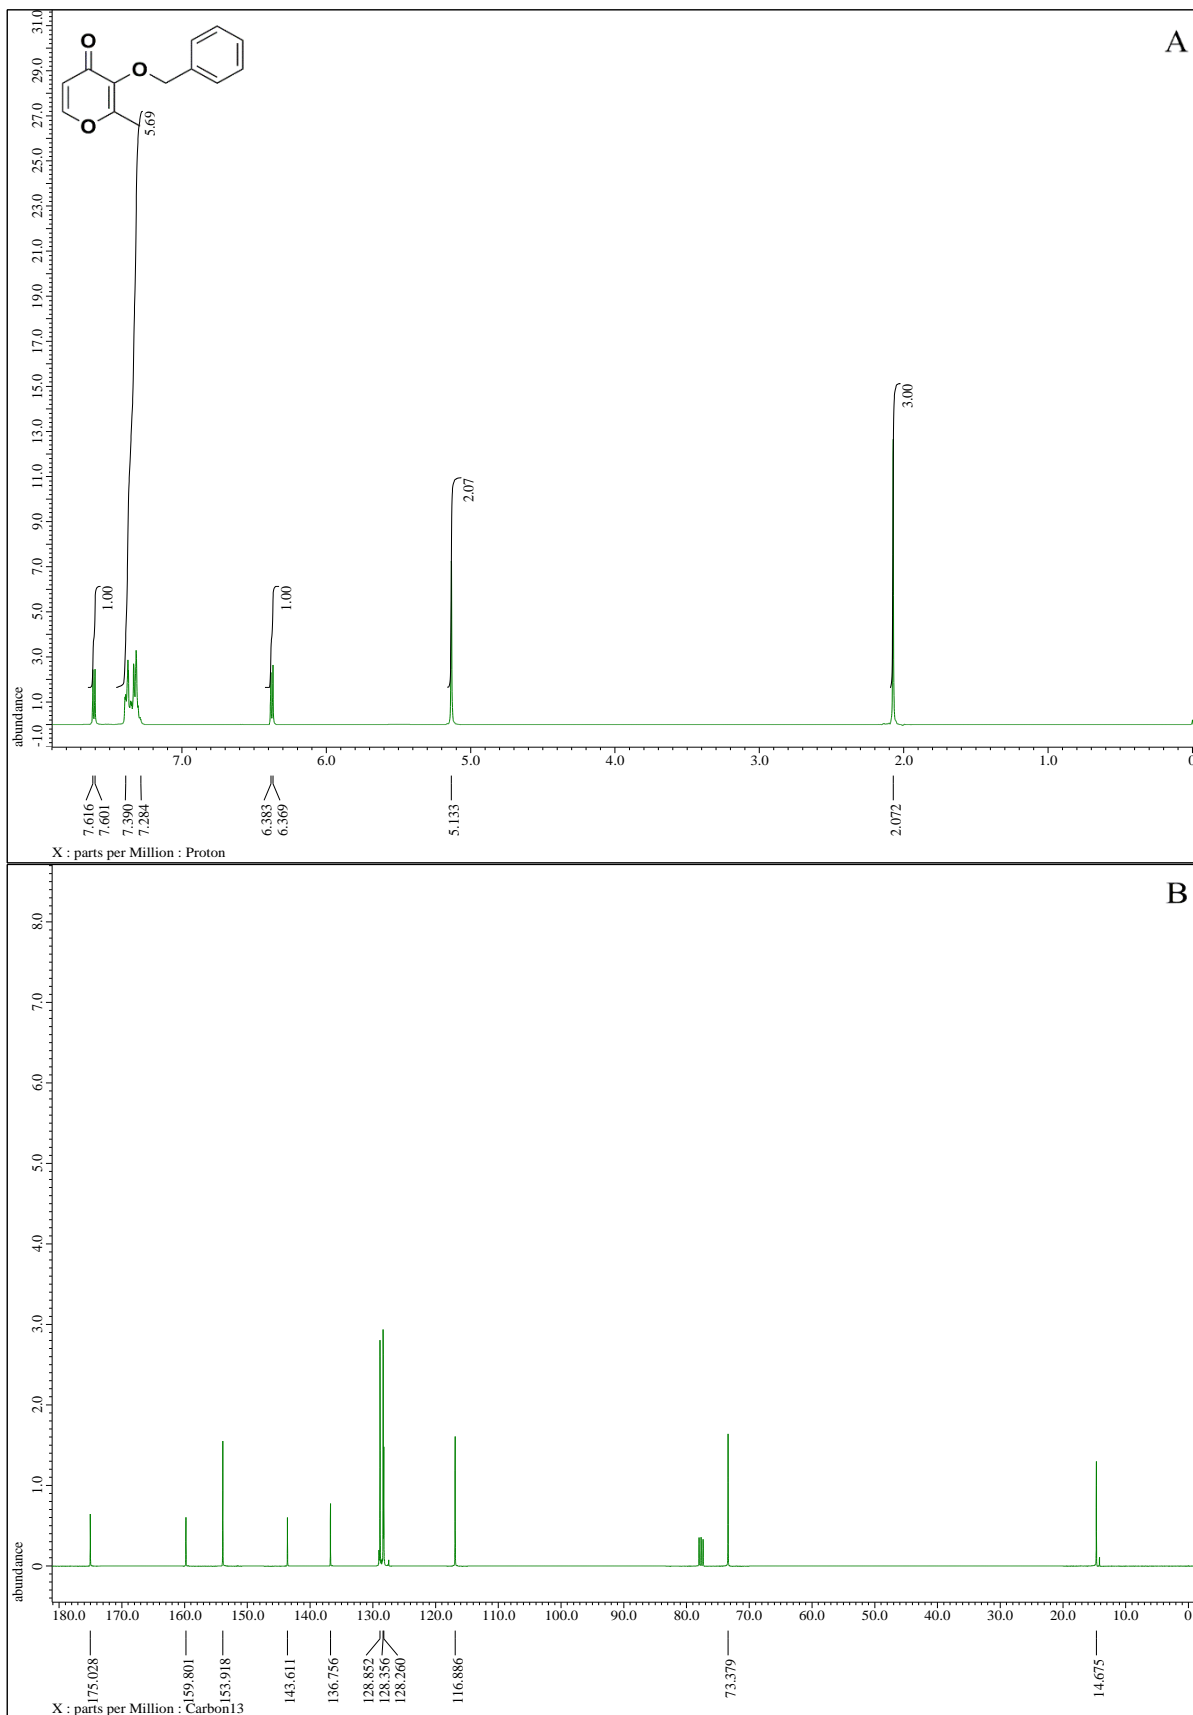

**Figure S18:** (A)  $^1\text{H}$ -NMR spectra of 3-(benzyloxy)-2-methyl-1,4-dihydropyridin-4-one (19) at 400 MHz in  $\text{CDCl}_3$ , (B)  $^{13}\text{C}$ -NMR spectra of 3-(benzyloxy)-2-methyl-1,4-dihydropyridin-4-one (19) at 100 MHz in  $\text{CDCl}_3$

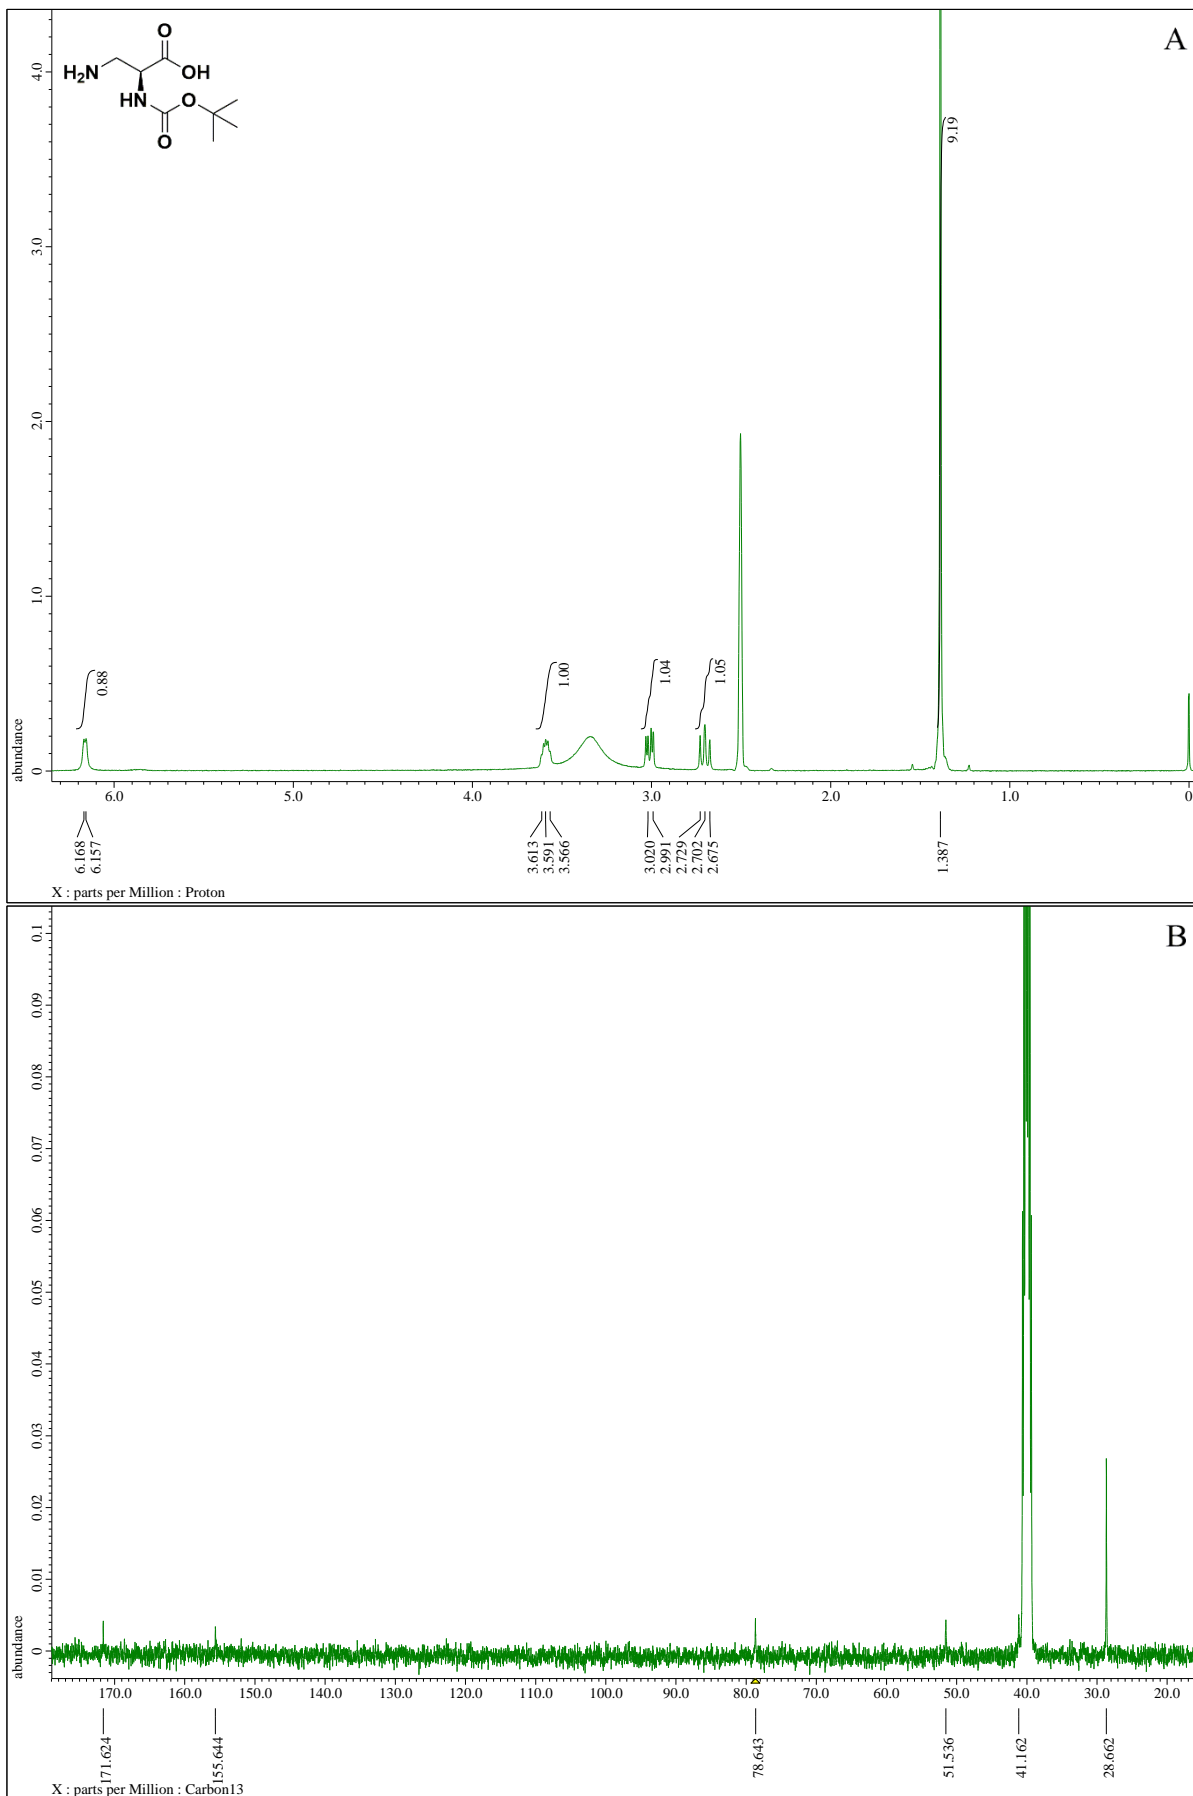

**Figure S19: (A) <sup>1</sup>H-NMR spectra of (2L)-3-amino-2-[(tert-butoxy)carbonyl]amino}propanoic acid (20) at 400 MHz in DMSO-*d*<sub>6</sub> and (B) <sup>13</sup>C-NMR spectra of (2L)-3-amino-2-[(tert-butoxy)carbonyl]amino}propanoic acid (20) at 100 MHz in DMSO-*d*<sub>6</sub>.**

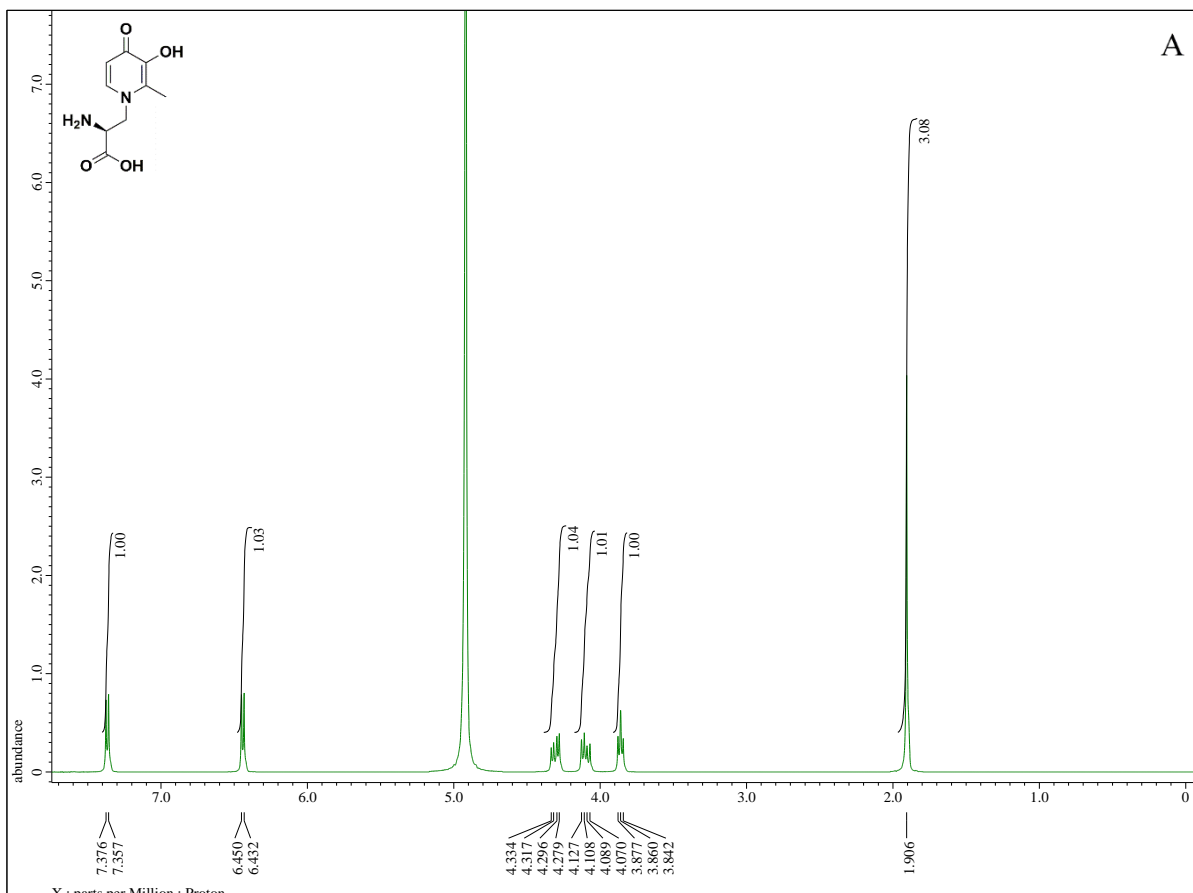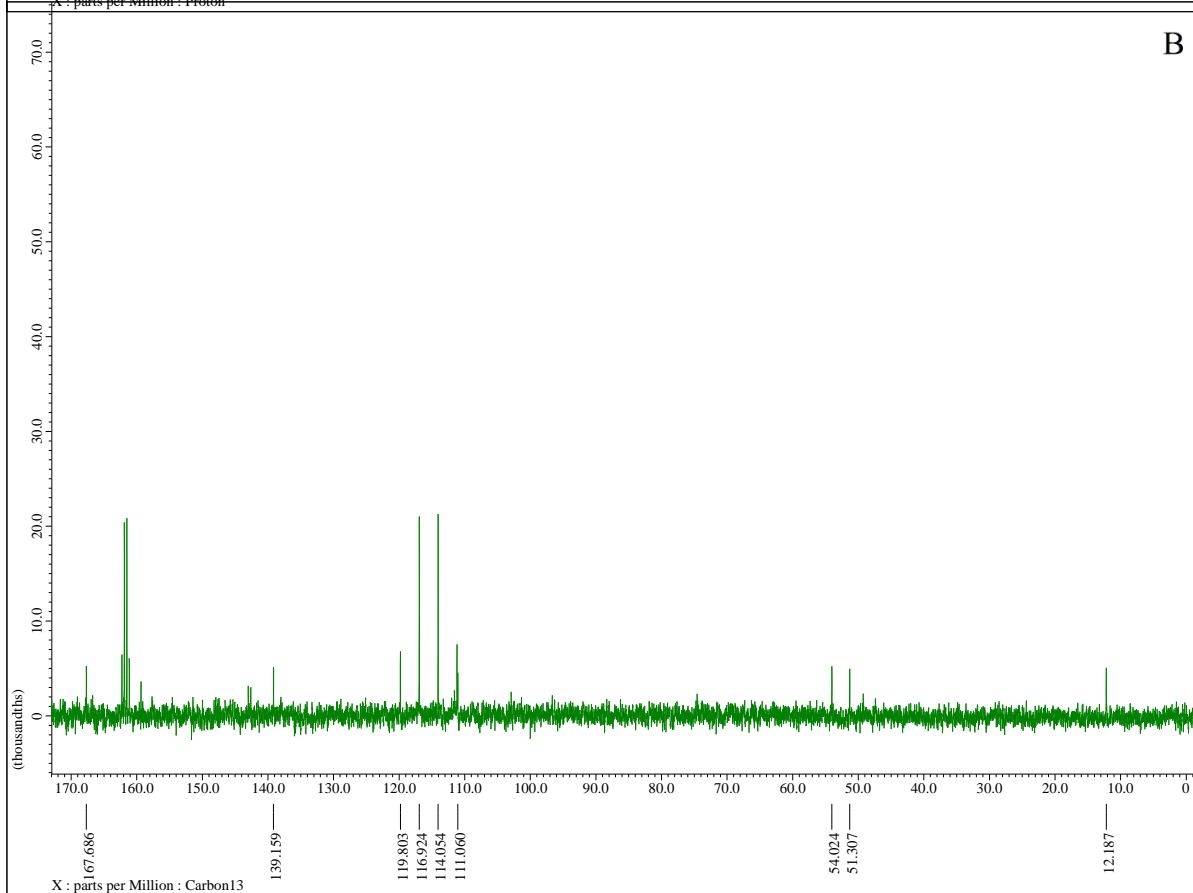



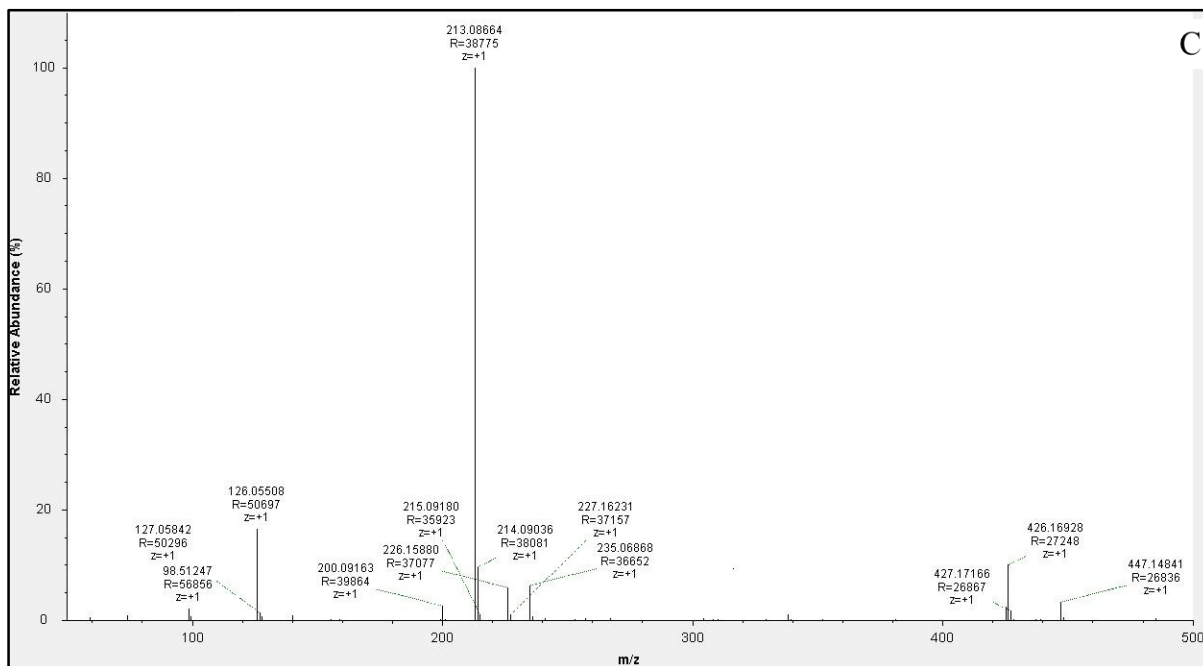

**Figure S10:** (A)  $^1\text{H}$ -NMR spectra (2L)-2-amino-3-(3-hydroxy-2-methyl-4-oxo-1,4-dihydropyridin-1-yl)propanoic acid (22) at 400 MHz in  $\text{D}_2\text{O}/\text{CF}_3\text{CO}_2\text{D}$  and (B)  $^{13}\text{C}$ -NMR spectra of (2L)-2-amino-3-(3-hydroxy-2-methyl-4-oxo-1,4-dihydropyridin-1-yl)propanoic acid (22) at 100 MHz in  $\text{D}_2\text{O}/\text{CF}_3\text{CO}_2\text{D}$  and (C) HRMS of (2L)-2-amino-3-(3-hydroxy-2-methyl-4-oxo-1,4-dihydropyridin-1-yl)propanoic acid (22).

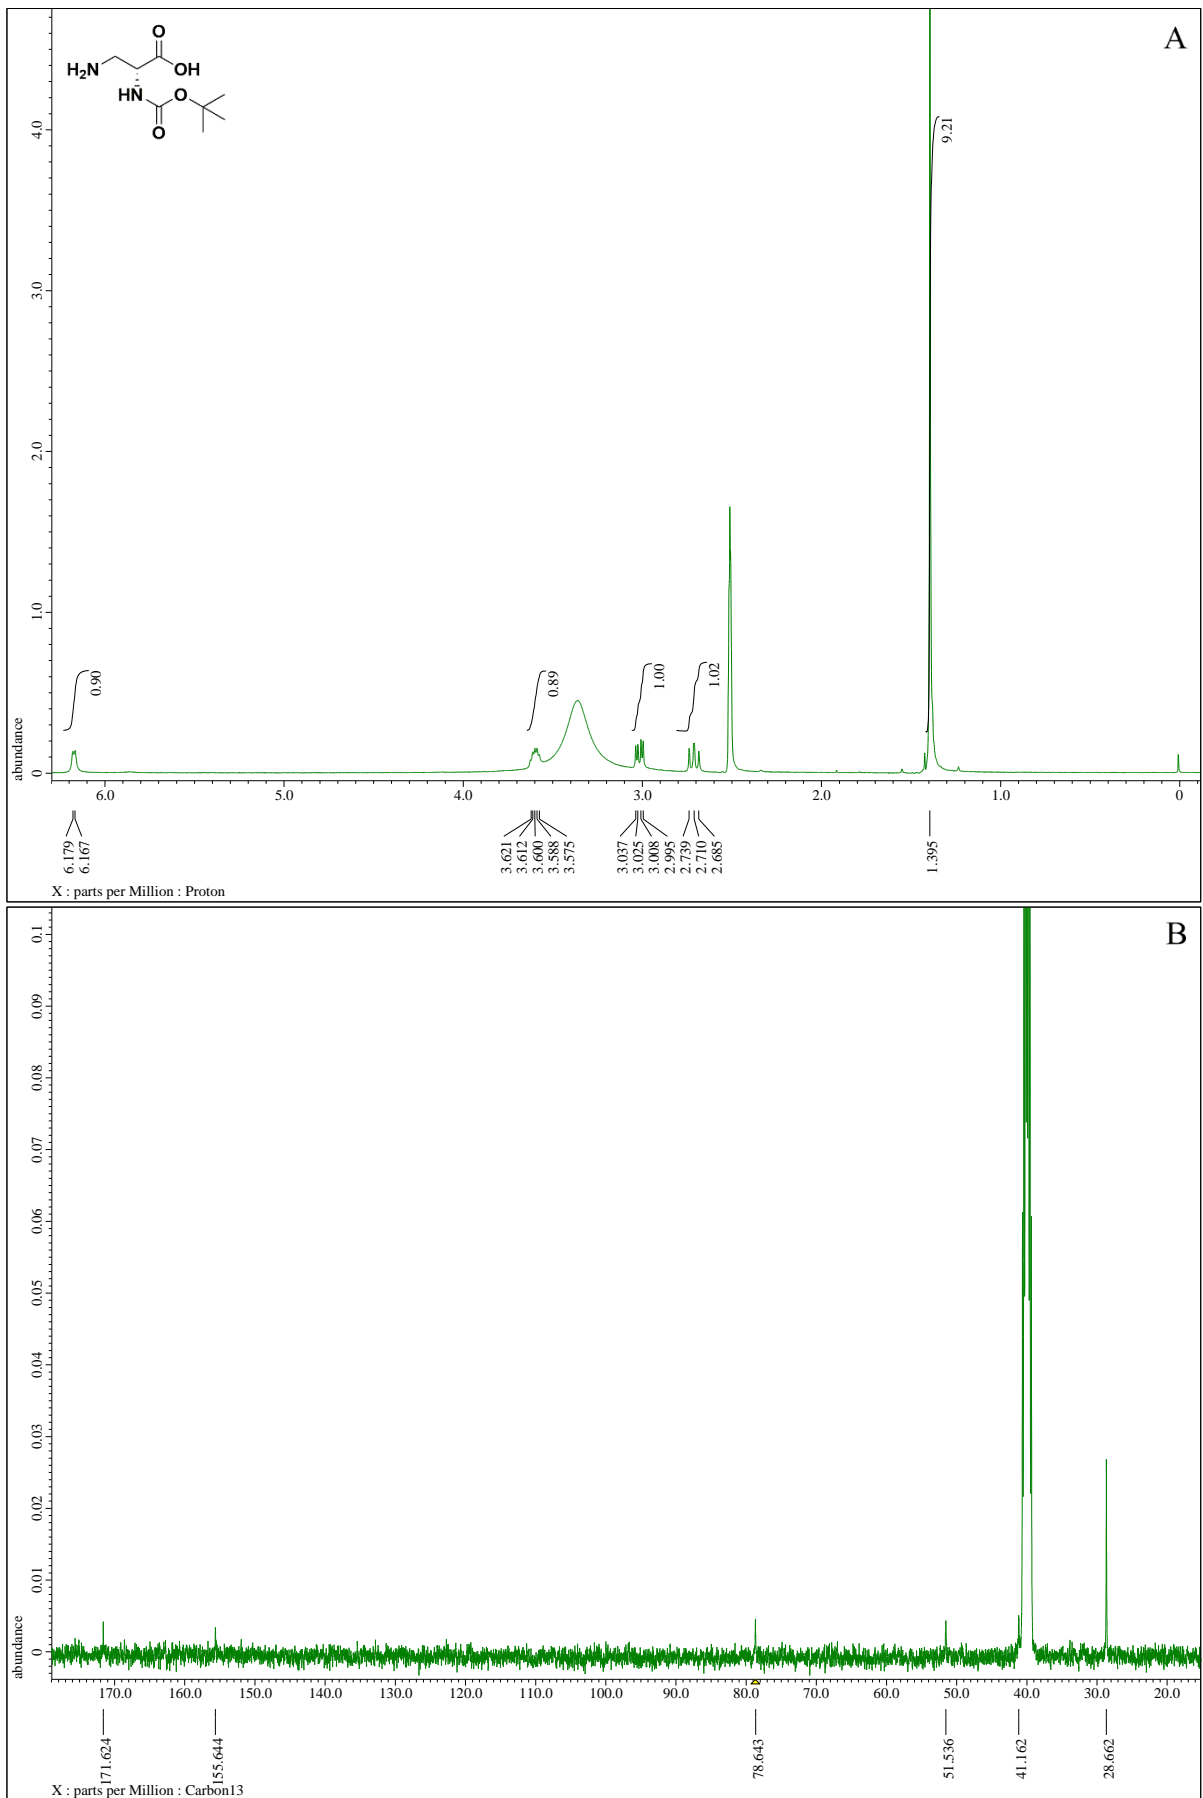

**Figure S21: (A) <sup>1</sup>H-NMR spectra of (2D)-3-amino-2-[(tert-butoxy)carbonyl]amino}propanoic acid (21) at 400 MHz in DMSO-d<sub>6</sub> and (B) <sup>13</sup>C-NMR spectra of (2D)-3-amino-2-[(tert-butoxy)carbonyl]amino}propanoic acid**

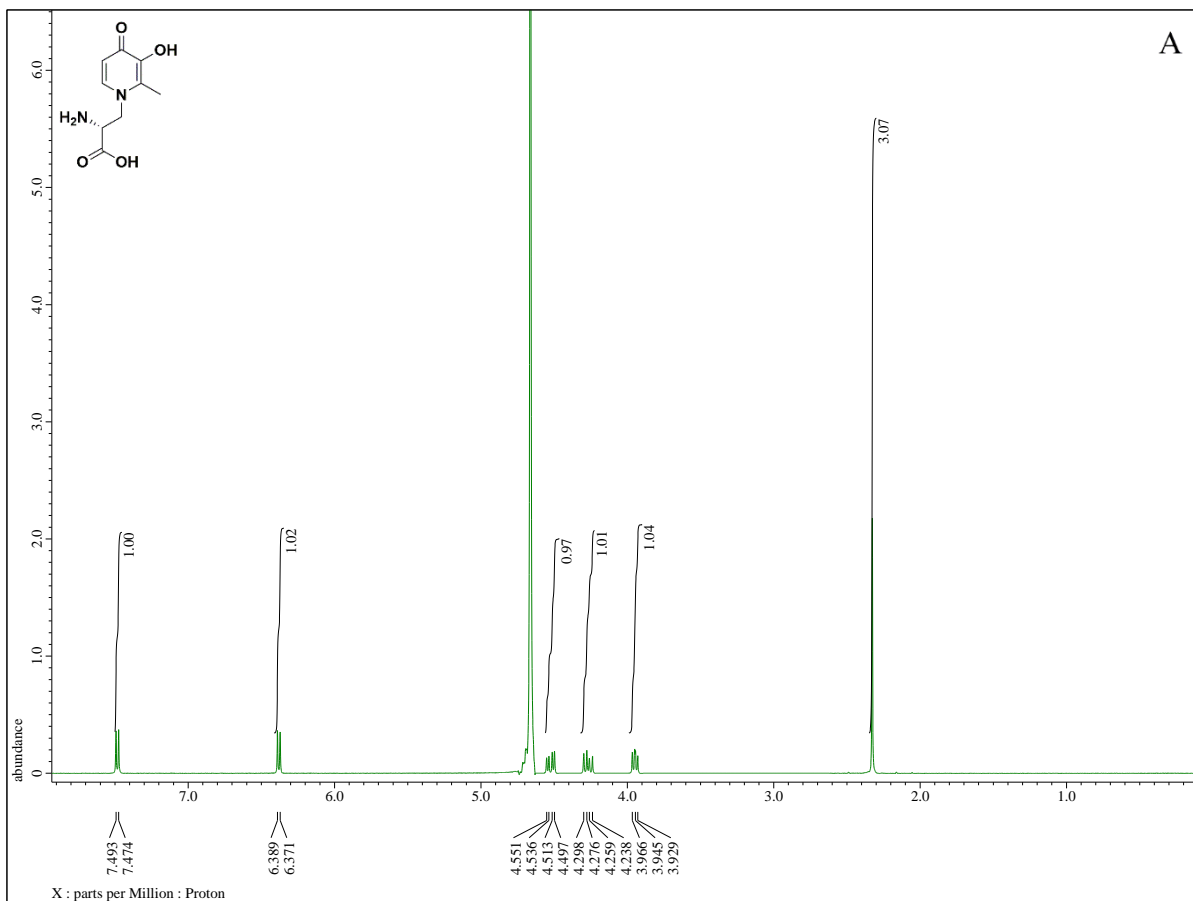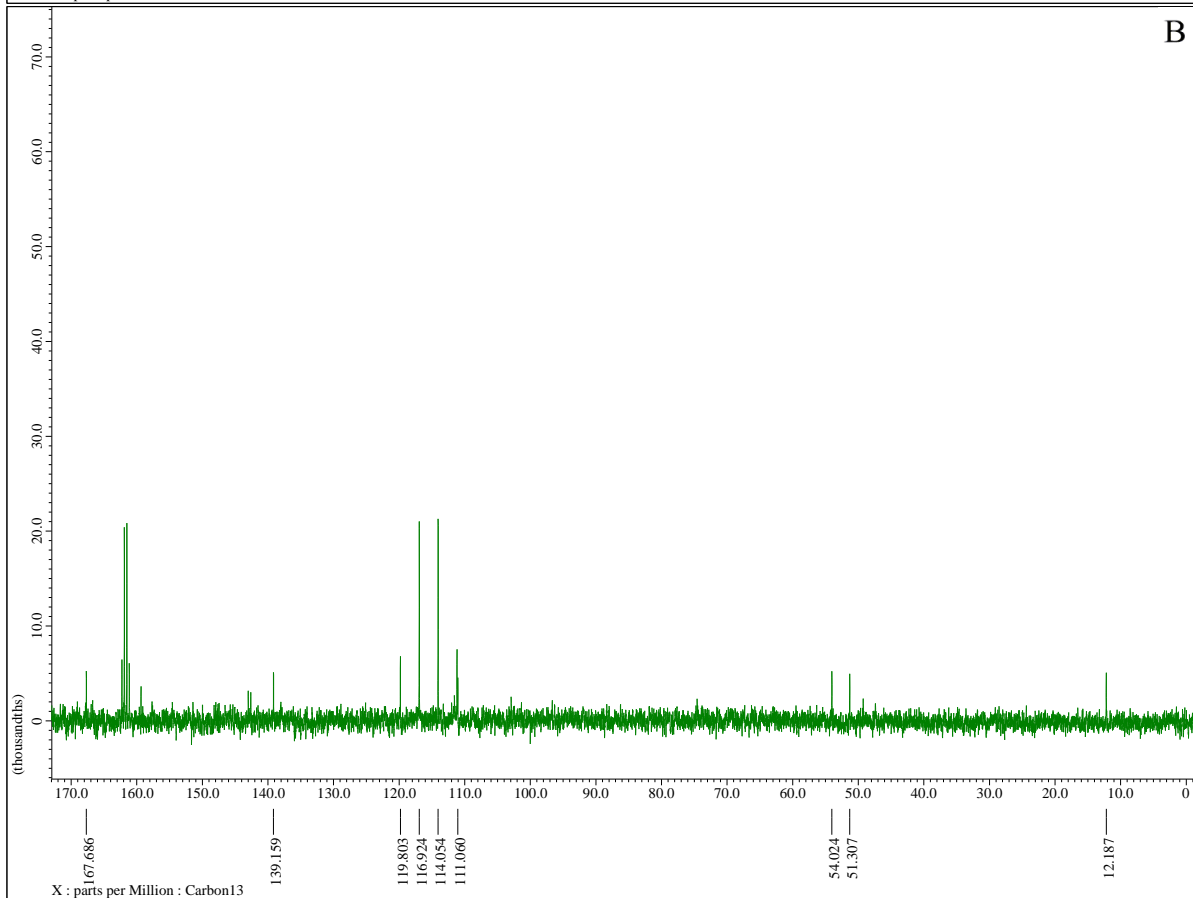

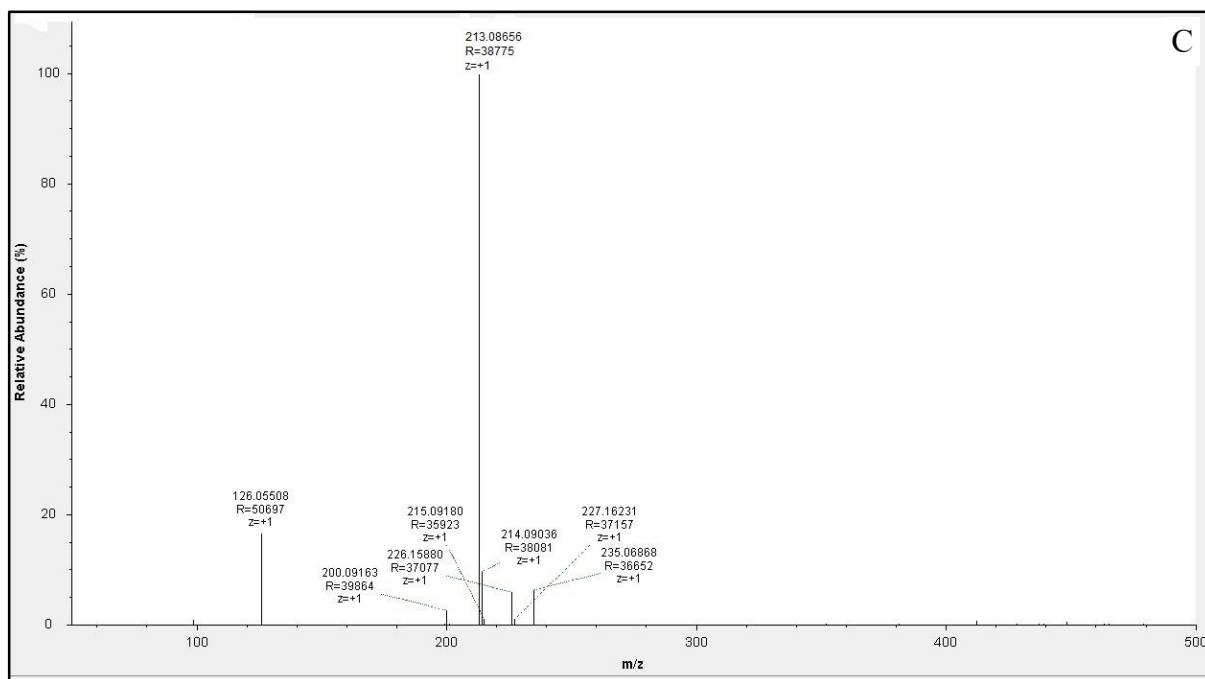

**Figure S22:** (A)  $^1\text{H}$ -NMR spectra (2D)-2-amino-3-(3-hydroxy-2-methyl-4-oxo-1,4-dihydropyridin-1-yl)propanoic acid (23) at 400 MHz in  $\text{D}_2\text{O}/\text{CF}_3\text{CO}_2\text{D}$  and (B)  $^{13}\text{C}$ -NMR spectra of (2D)-2-amino-3-(3-hydroxy-2-methyl-4-oxo-1,4-dihydropyridin-1-yl)propanoic acid (23) at 100 MHz in  $\text{D}_2\text{O}/\text{CF}_3\text{CO}_2\text{D}$  and (C) HRMS of (2R)-2-amino-3-(3-hydroxy-2-methyl-4-oxo-1,4-dihydropyridin-1-yl)propanoic acid (23).

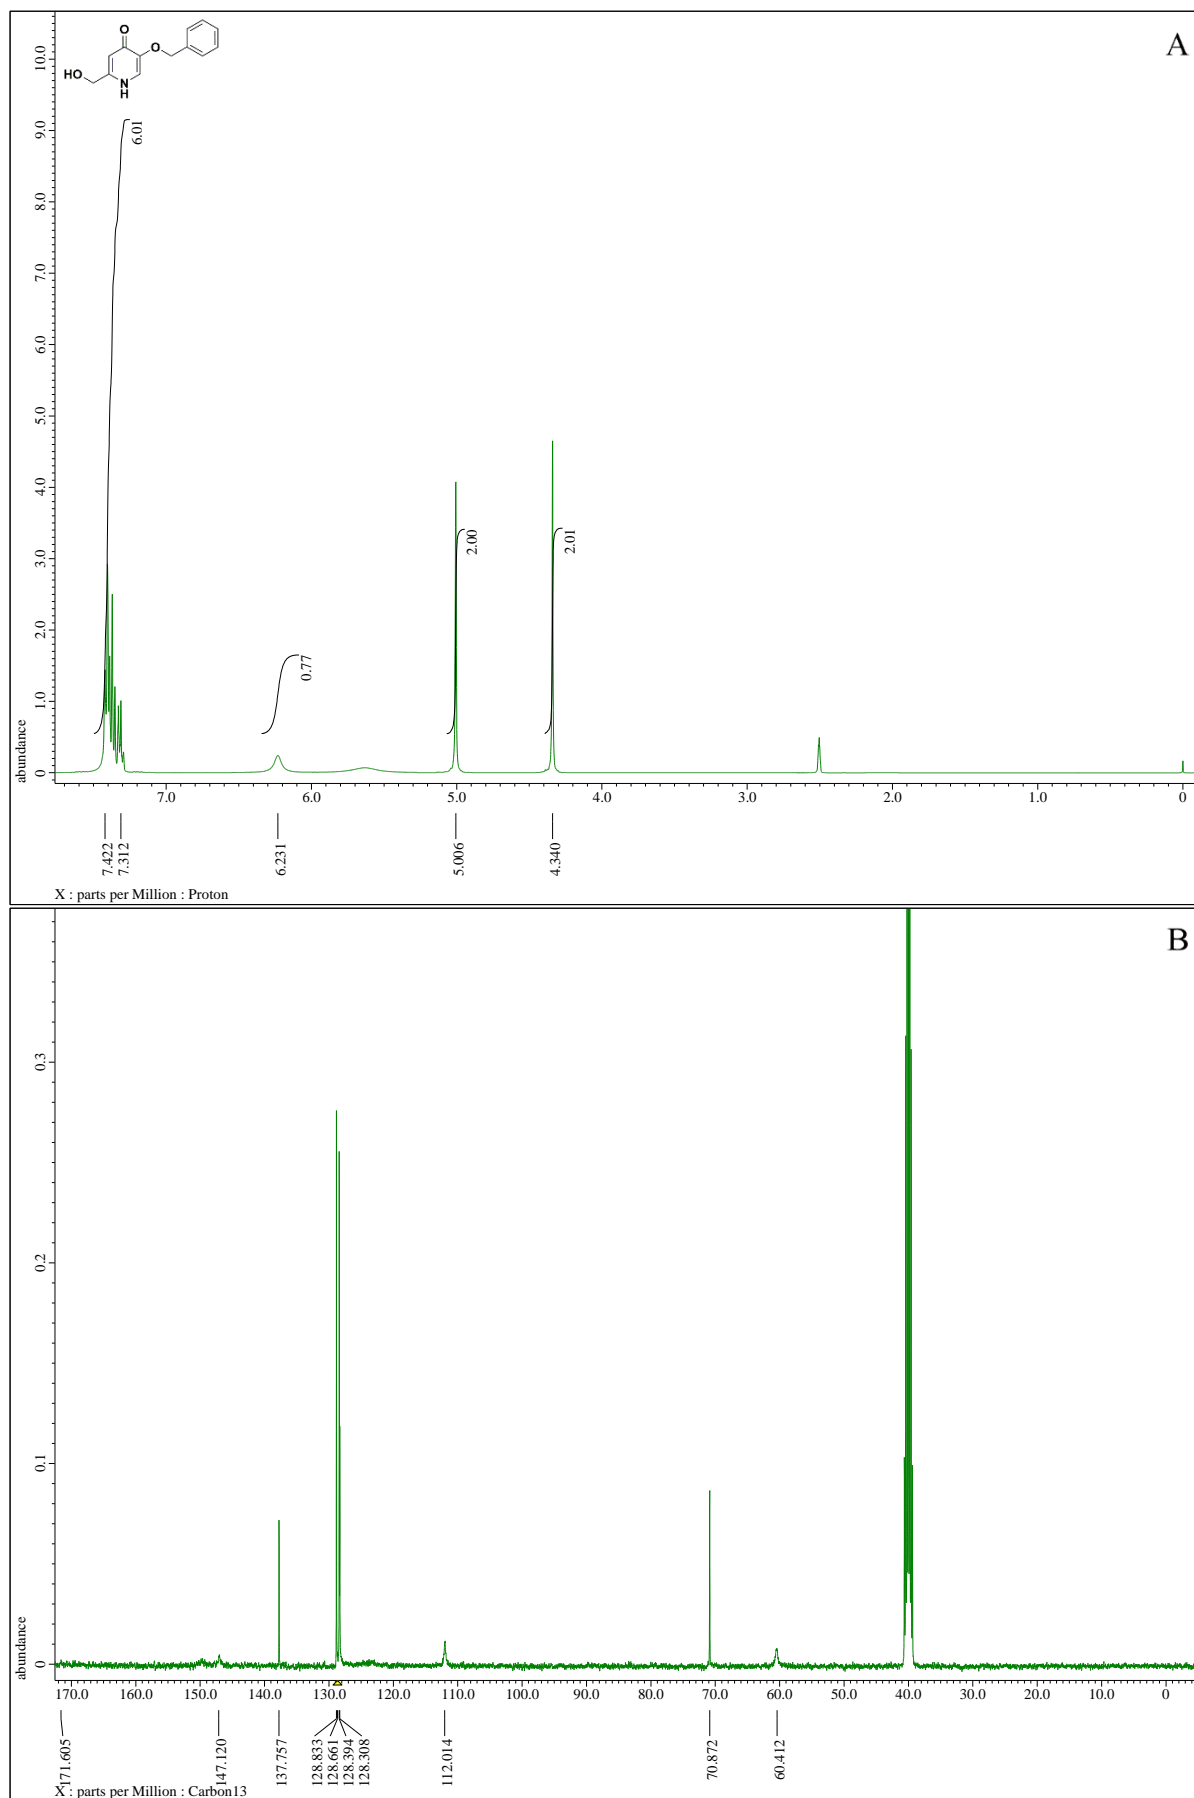

**Figure S23:** (A) <sup>1</sup>H-NMR spectra of 5-(benzyloxy)-2-(hydroxymethyl)-1,4-dihydropyridin-4-one (24) at 400 MHz in DMSO-*d*<sub>6</sub> and (B) <sup>13</sup>C-NMR spectra of 5-(benzyloxy)-2-(hydroxymethyl)-1,4-dihydropyridin-4-one (24) at 100 MHz in DMSO-*d*<sub>6</sub>.

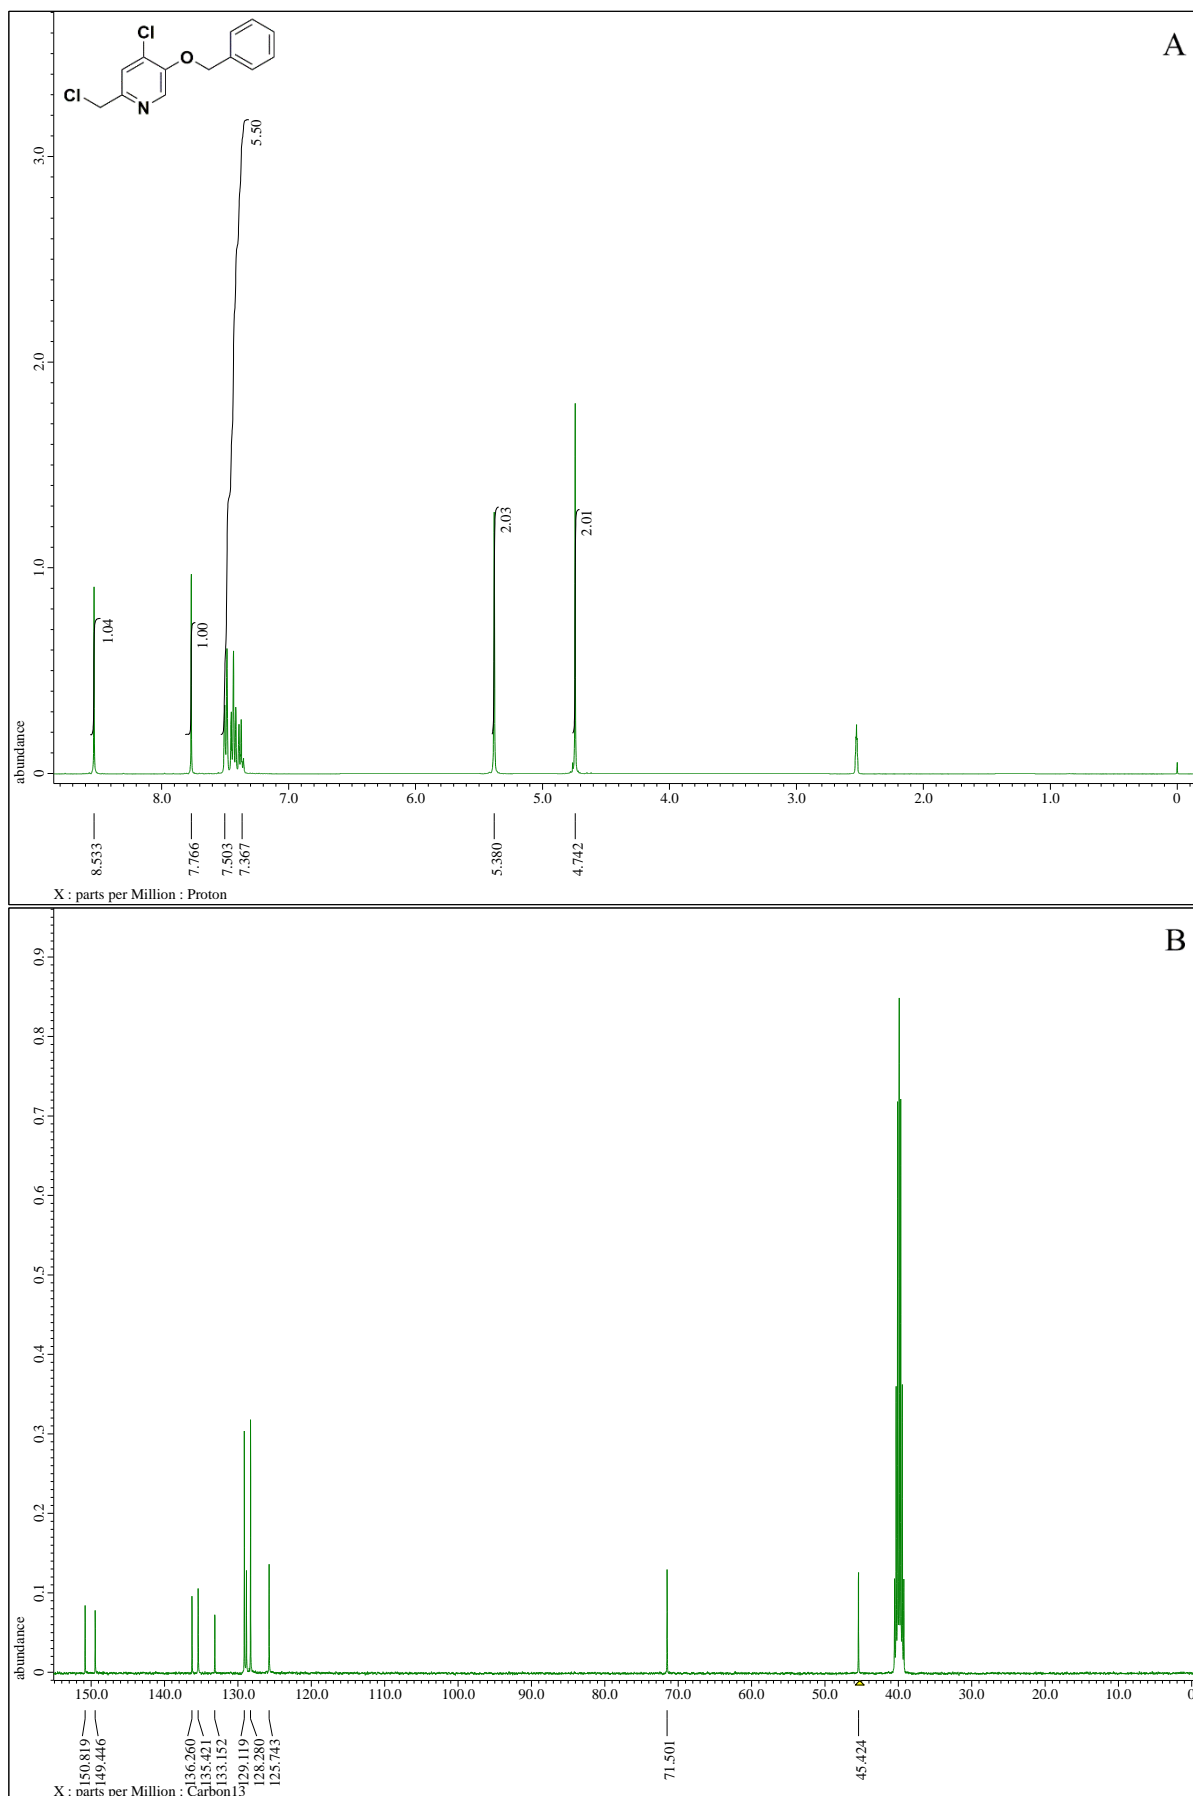

**Figure S24:** (A)  $^1\text{H}$ -NMR spectra of 5-(benzyloxy)-4-chloro-2-(chloromethyl)pyridine (25) at 400 MHz in  $\text{DMSO-d}_6$  and (B)  $^{13}\text{C}$ -NMR spectra of 5-(benzyloxy)-4-chloro-2-(chloromethyl)pyridine (25) at 100 MHz in  $\text{DMSO-d}_6$ .

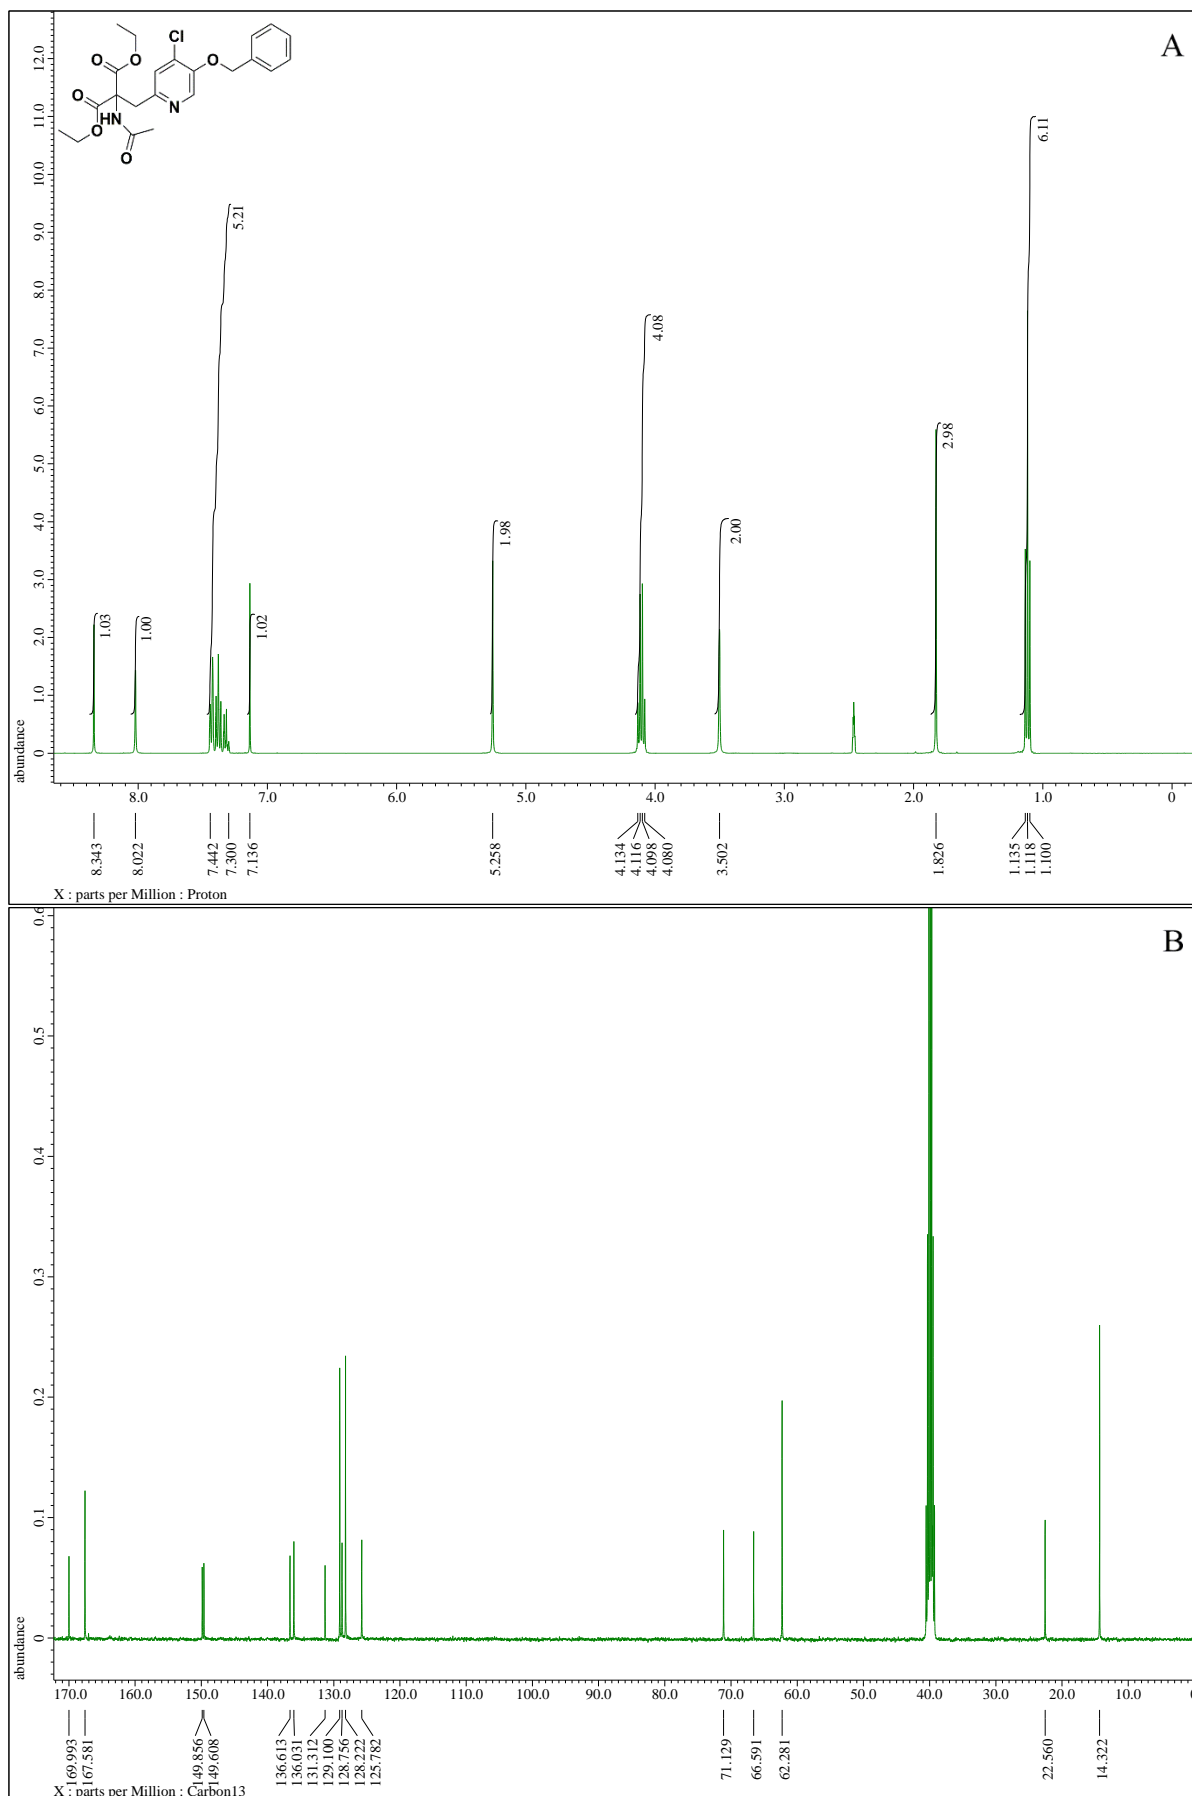

**Figure S25: (A) <sup>1</sup>H-NMR spectra of 1,3-diethyl 2-[[5-(benzyloxy)-4-chloropyridin-2-yl]methyl]-2-acetamidopropanedioate (26) at 400 MHz in DMSO-d<sub>6</sub> and (B) <sup>13</sup>C-NMR spectra of 1,3-diethyl 2-[[5-(benzyloxy)-4-chloropyridin-2-yl]methyl]-2-acetamidopropanedioate (26) at 100 MHz in DMSO-d<sub>6</sub>.**

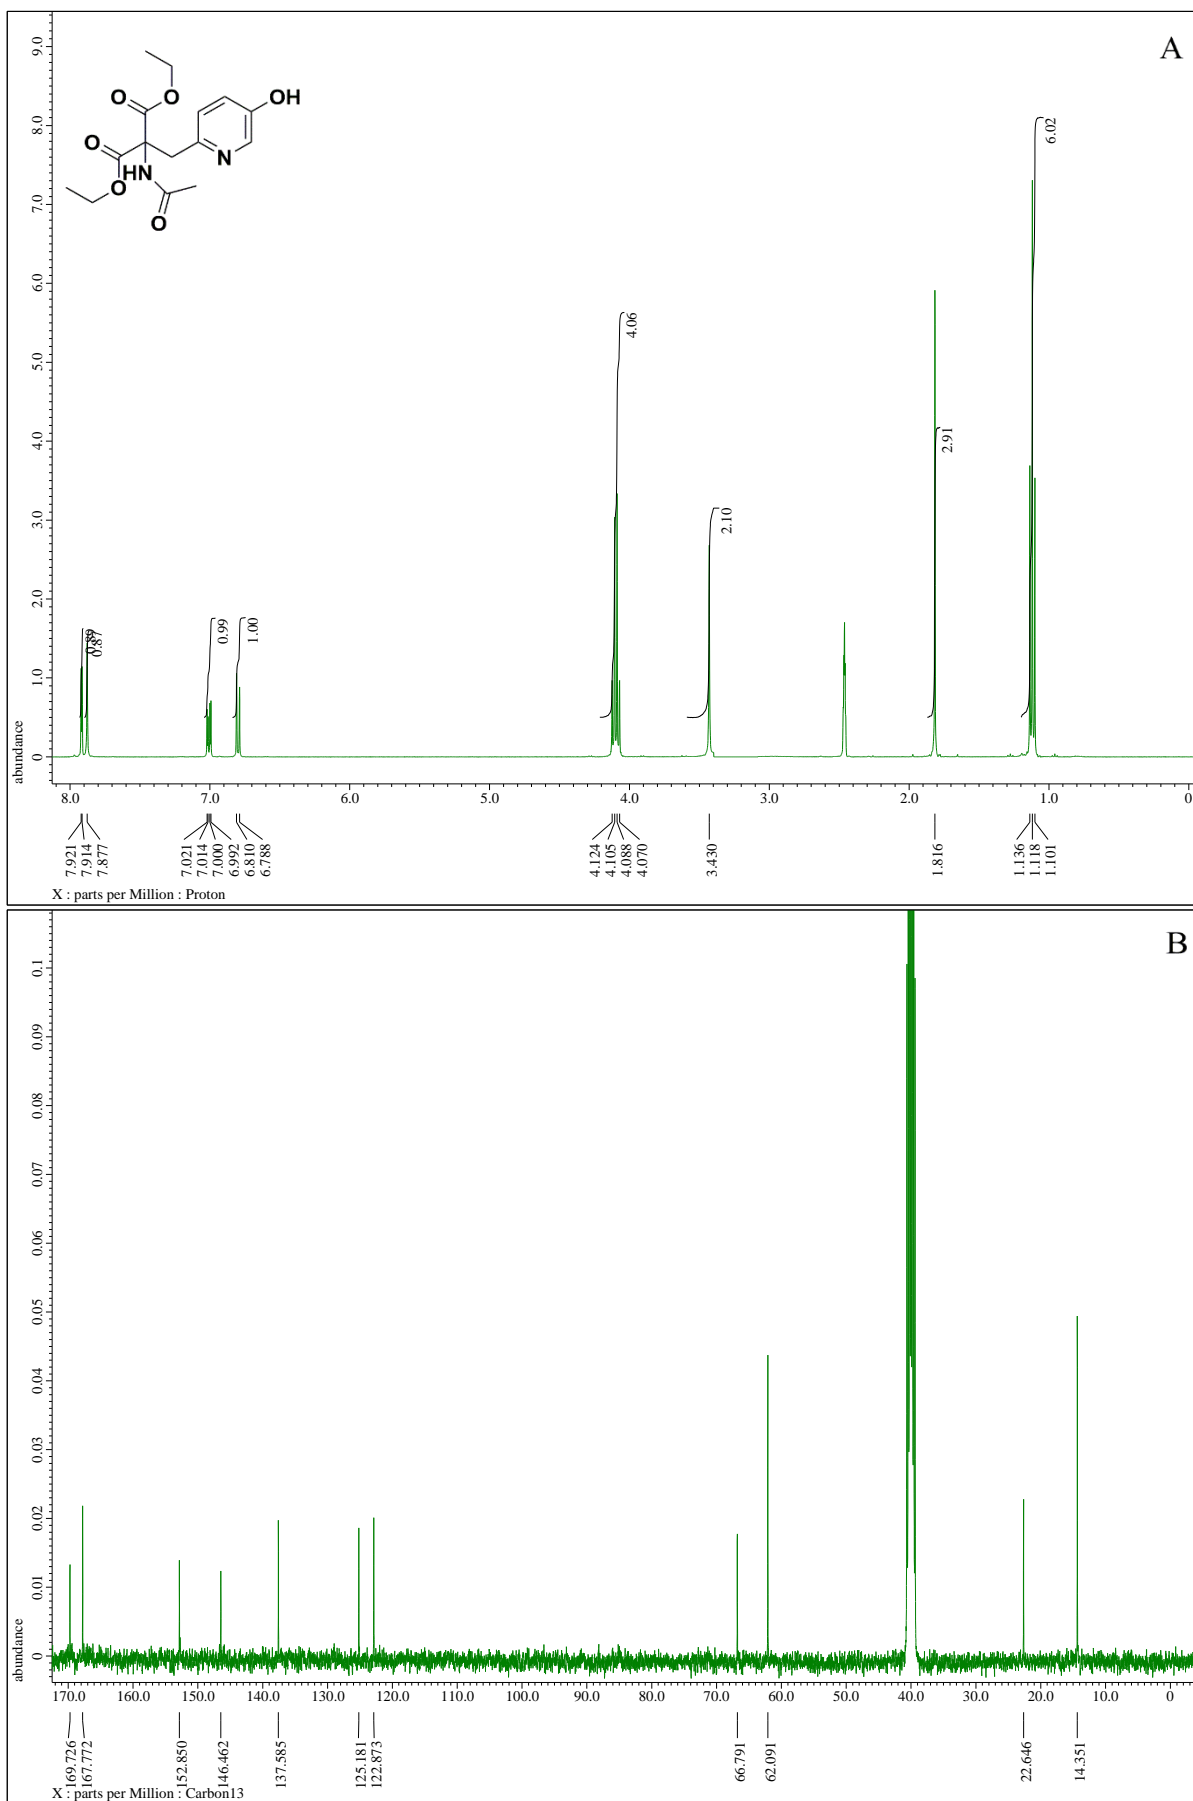



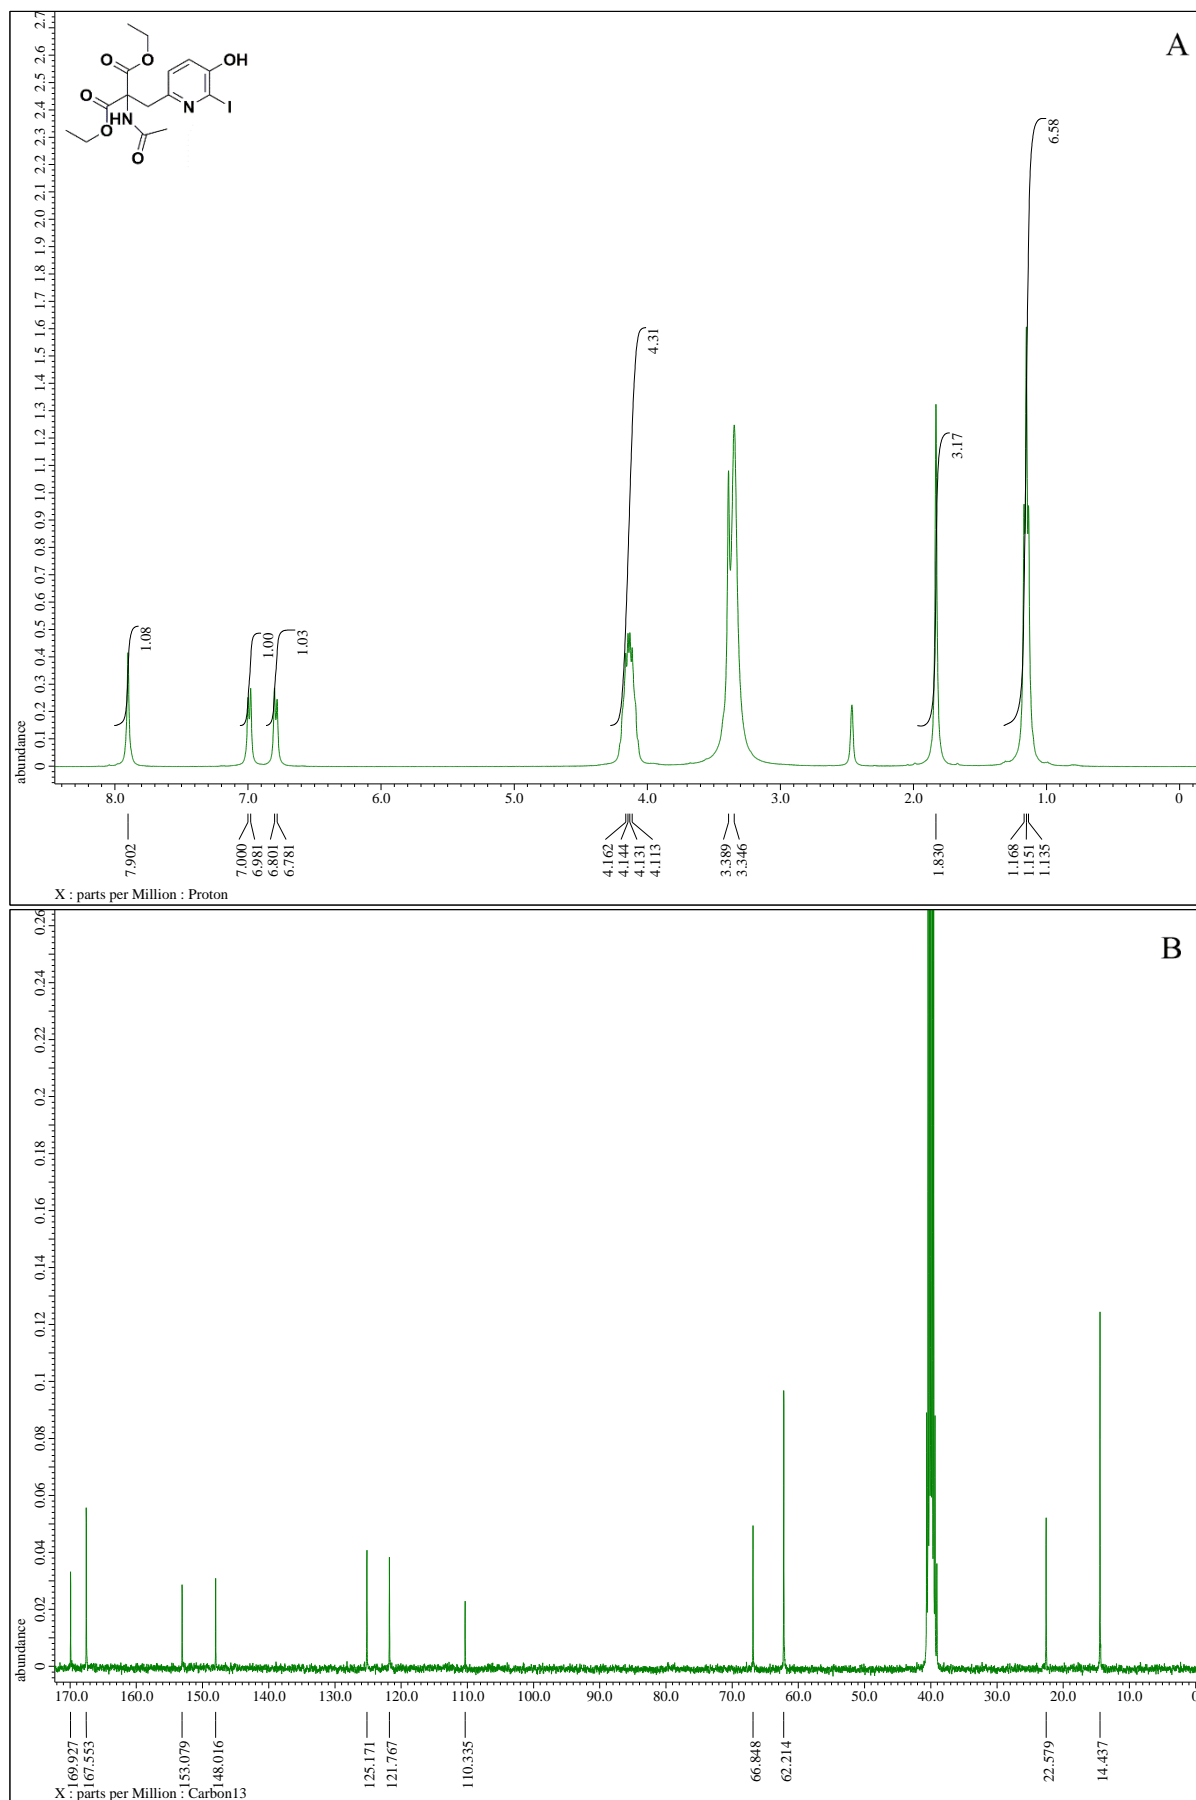

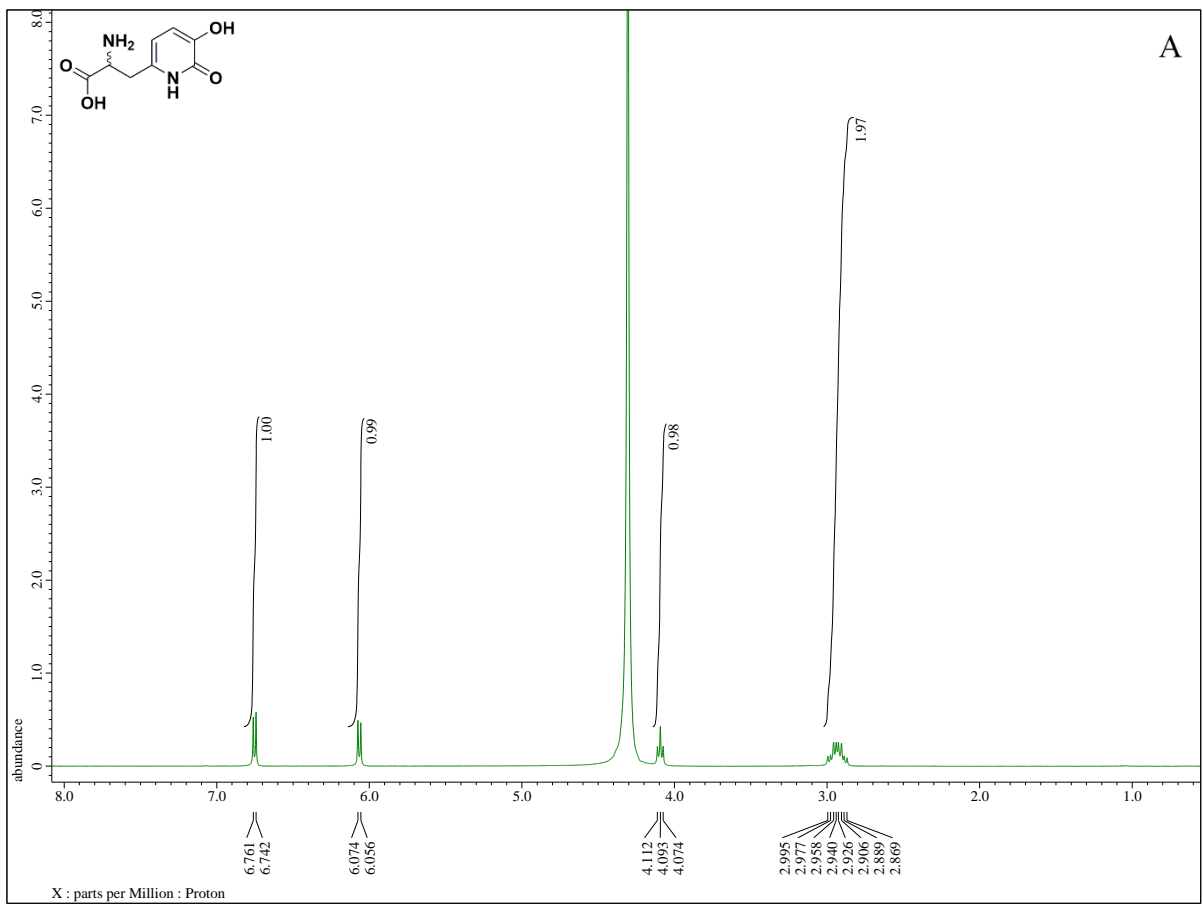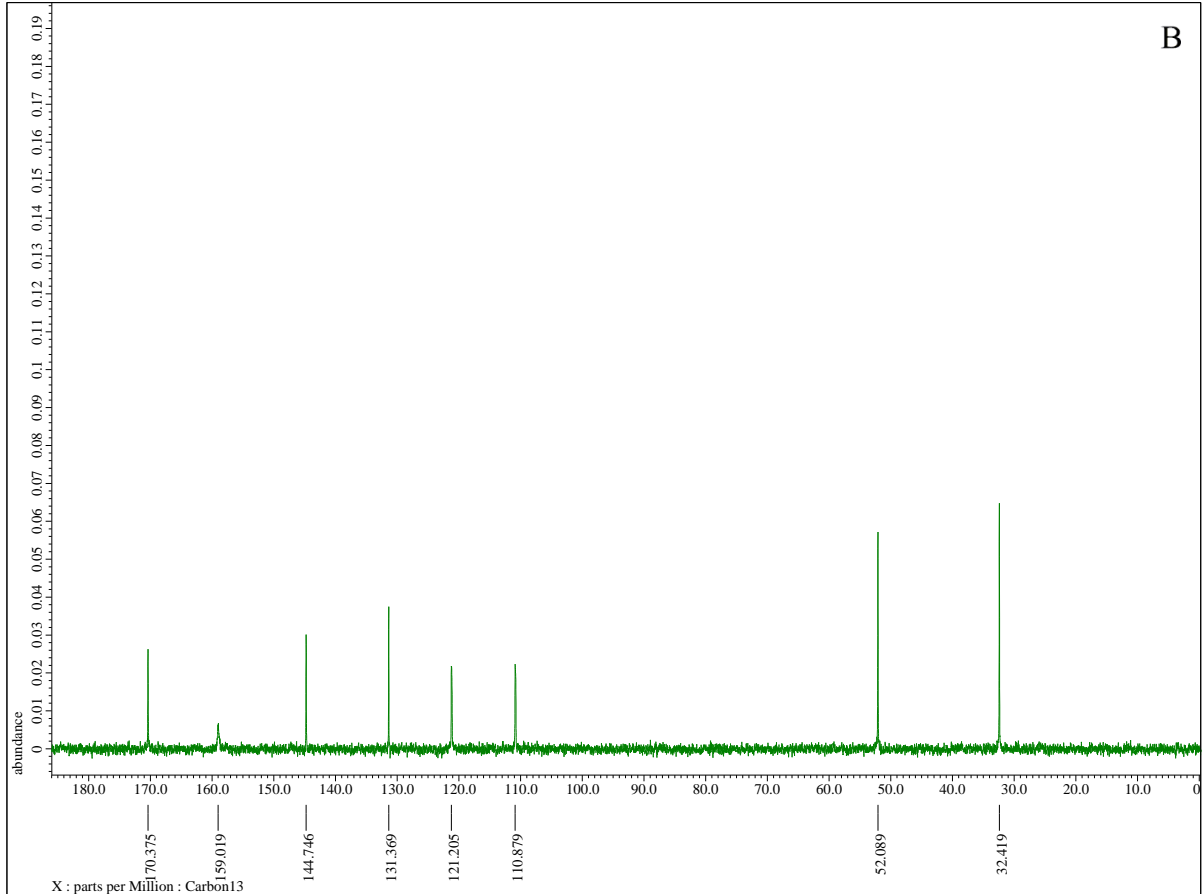

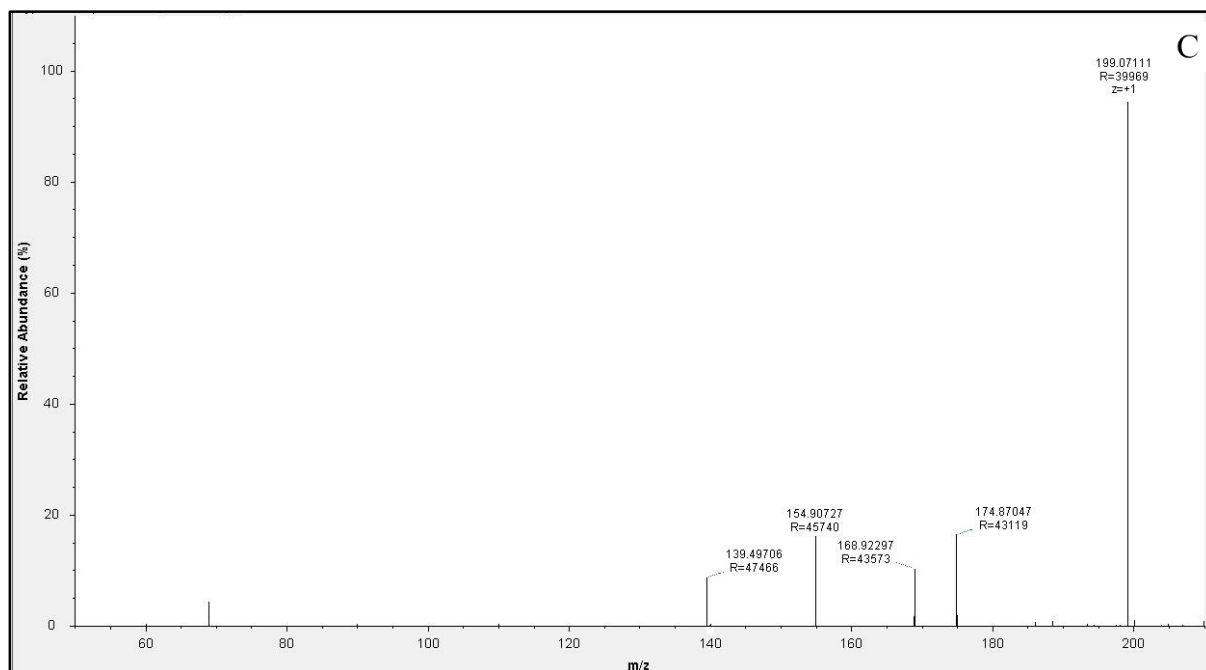

**Figure S28:** (A)  $^1\text{H}$ -NMR spectra of *rac*-2-amino-3-(5-hydroxy-6-oxo-1,6-dihydropyridin-2-yl)propanoic acid (29) at 400 MHz in  $\text{D}_2\text{O}/\text{CF}_3\text{CO}_2\text{D}$ , (B)  $^{13}\text{C}$ -NMR spectra of *rac*-2-amino-3-(5-hydroxy-6-oxo-1,6-dihydropyridin-2-yl)propanoic acid (29) at 100 MHz in  $\text{D}_2\text{O}/\text{CF}_3\text{CO}_2\text{D}$  and (C) HRMS of *rac*-2-amino-3-(5-hydroxy-6-oxo-1,6-dihydropyridin-2-yl)propanoic acid (29).

## REFERENCES

1. Harris RLN (1976) Potential Wool Growth Inhibitors Improved Syntheses of Mimosine and Related 4(1H)-Pyridones. *Aust J Chem* 29(6): 1329-1334.
2. Thomas FA (1962) The Oxidation of the Side Chain in Kojic Acid Benzyl Ether. *J Chem Soc*: 439-441.
3. Struk Ł, Sośnicki JG (2012) Noncryogenic Synthesis of Functionalized 2-Methoxypyridines by Halogen-Magnesium Exchange Using Lithium dibutyl(isopropyl)magnesate(1-) and Lithium Chloride. *Synthesis (Stuttg)* 44 (5): 735-746.
4. Liu S, Shang R, Shi L, Wan DCC, Lin H (2014) Synthesis and Biological Evaluation of 7H-thiazolo[3,2-B]-1,2,4-Triazin-7-One Derivatives as Dual Binding Site Acetylcholinesterase Inhibitors. *Eur J Med Chem* 81: 237-244.
5. Stojkovic MA, Piotrowski P, Schmuck C, Piantanida I (2015) A Short, Rigid Linker between Pyrene and Guanidiniocarbonyl-Pyrrole Induced a New Set of Spectroscopic Responses to the ds-DNA Secondary Structure. *Org Biomol Chem* 13(6): 1629-1633.
6. Harris RLN, Teitei T (1977) Potential Wool Growth Inhibitors. 2(1H)-Pyridone Analogues of Mimosine. *Aust J Chem* 30 (3): 649-655.
7. Liu ZD, Hider CR (2002) Design of Iron Chelators with Therapeutic Application. *Coord Chem Rev* 232: 151-171.
